# Supplementary material for: Investigation of RNA metabolism through large-scale genetic interaction profiling in yeast
Source: bioRxiv or medRxiv preprint supplement (doi:10.1101/2020.10.04.325191), 2020-10-04

Supplementary figure set (exclusion peak correction)

**Exclusion peak correction for GIM screens.** For each microarray hybridation file, the horizontal axis represents the relative genomic position of the affected gene, while the vertical axis represents, in  $\log_2$  transformed values, the measured growth defect. The title indicates the identifier of the screen replicate. For example « YDR283C GCN2 DEL 2 » corresponds to the screen done with the deletion (« DEL ») of the GCN2 gene, systematic name « YDR283C », for replicate number 2.

In red, original values, in black, values after correction using an estimation of recombination frequencies.

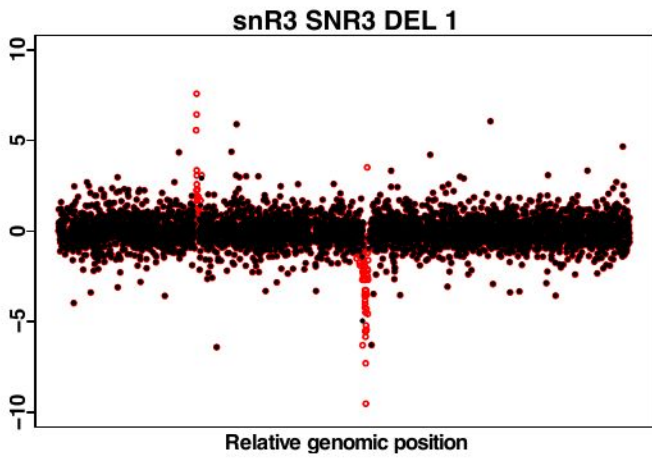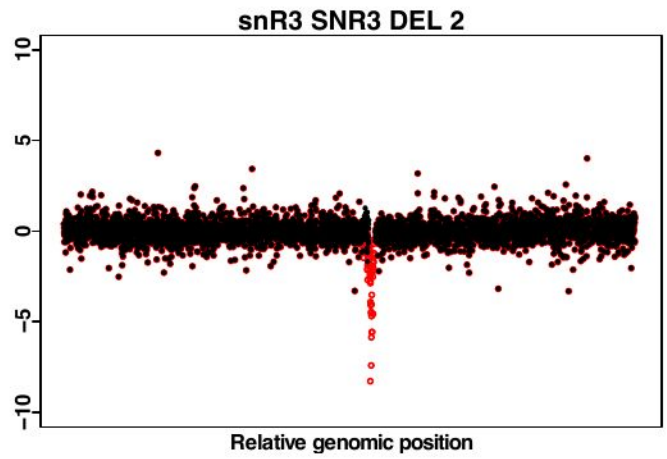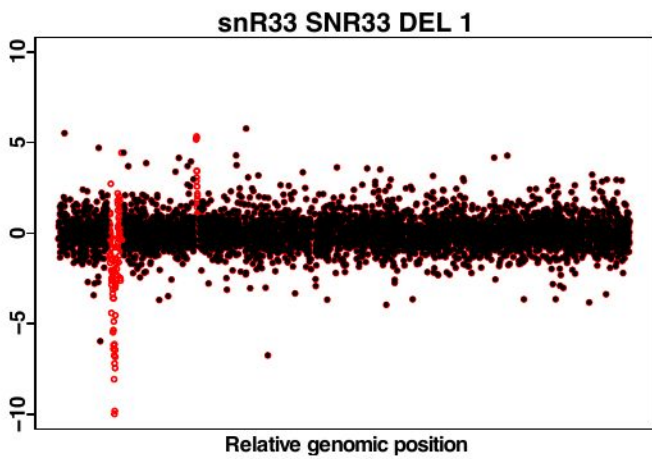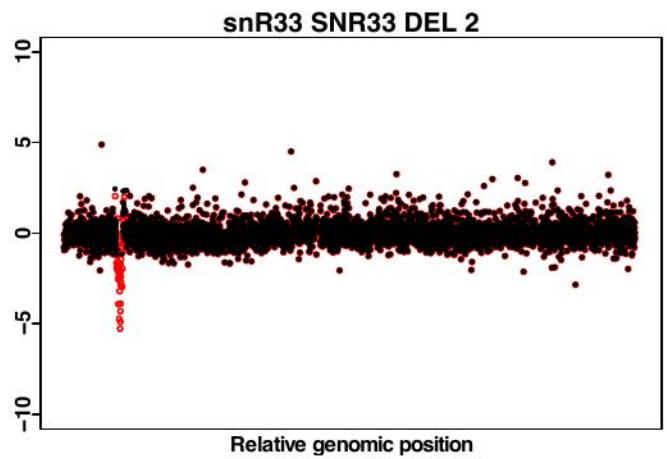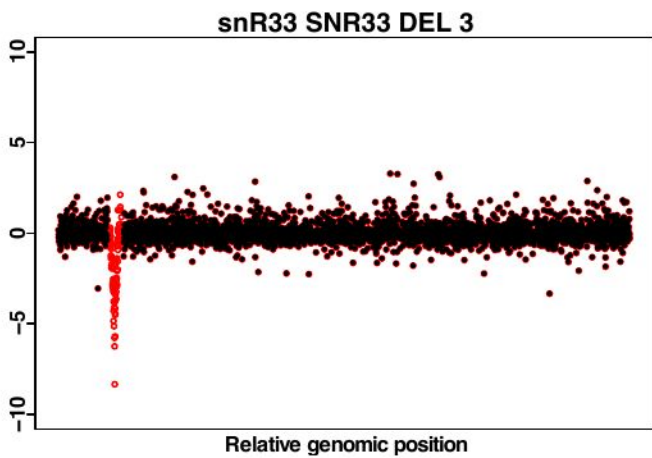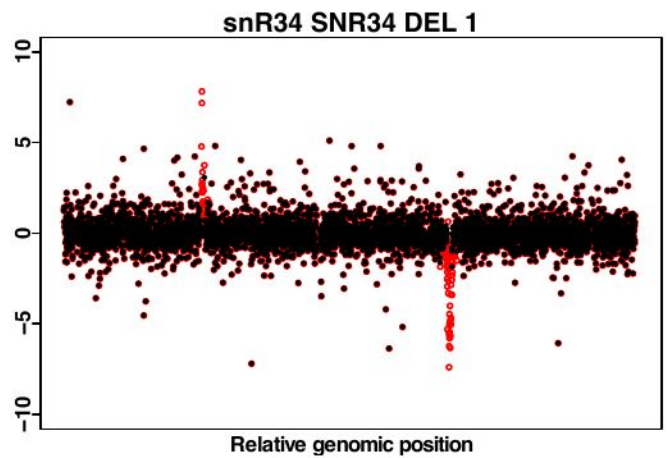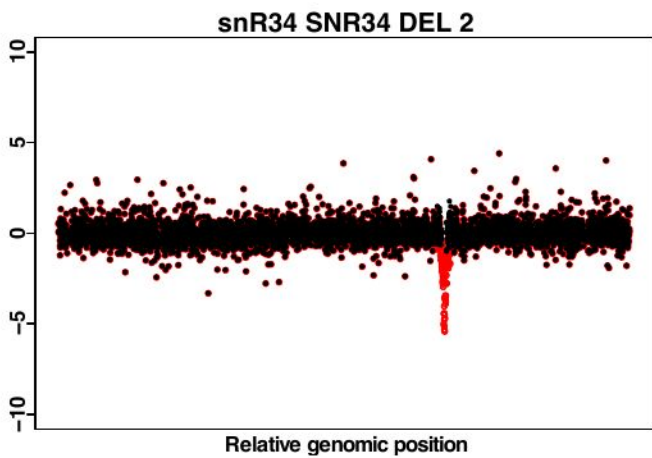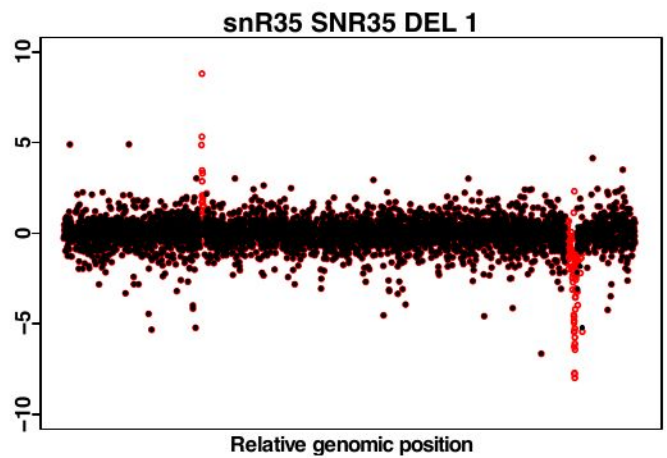

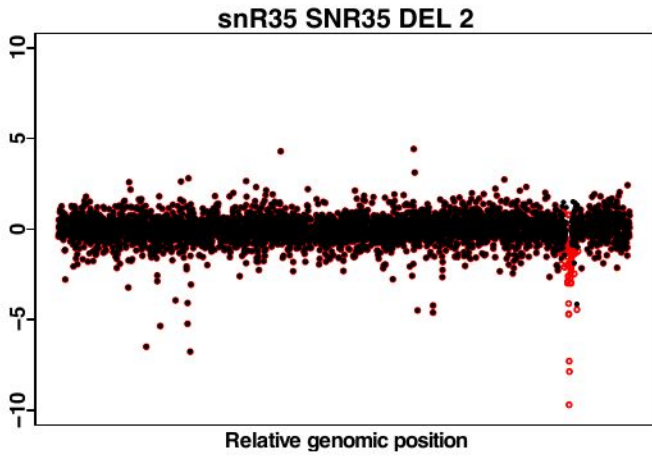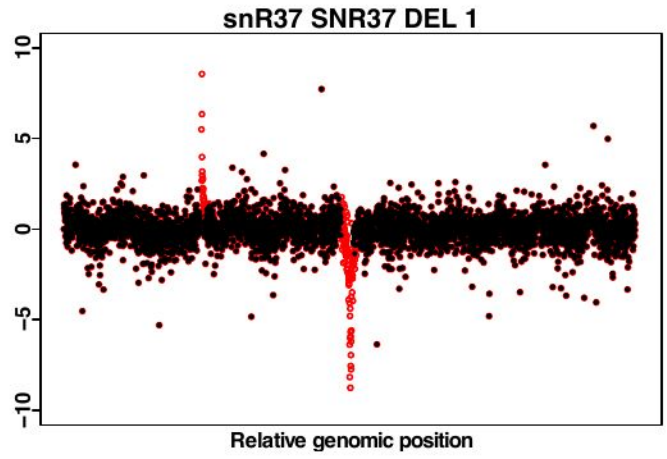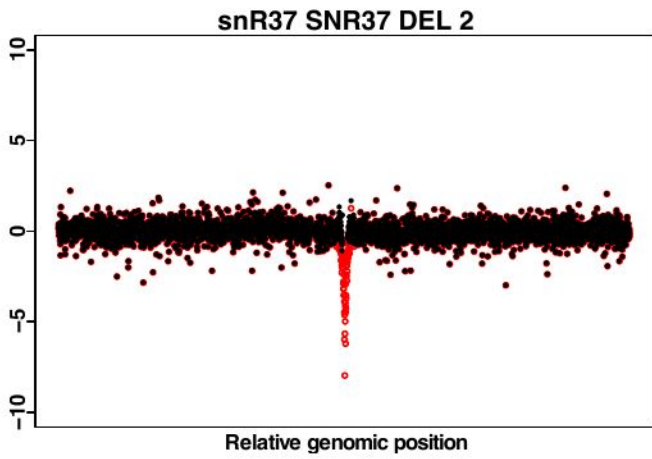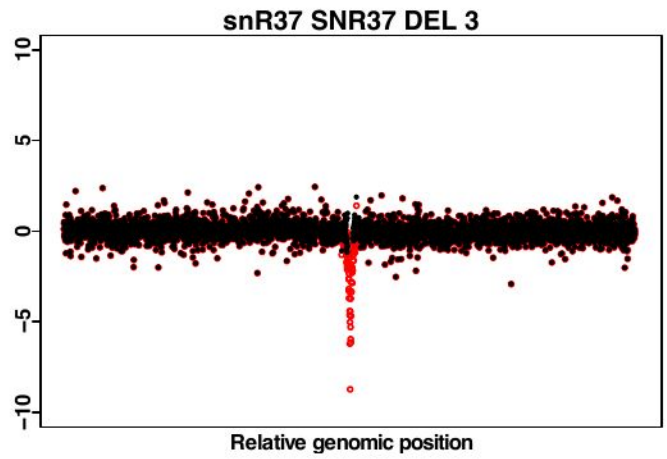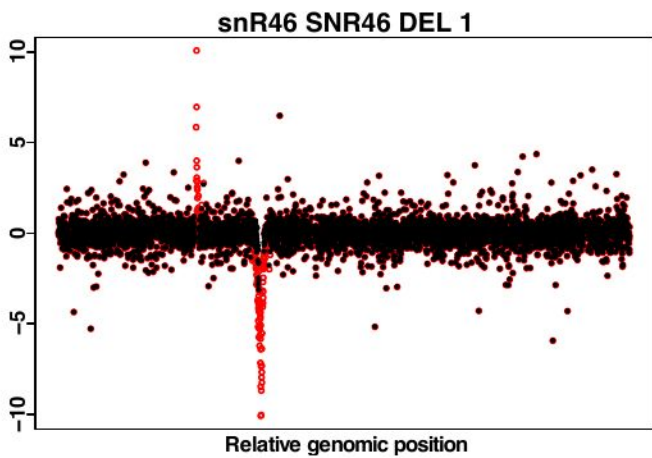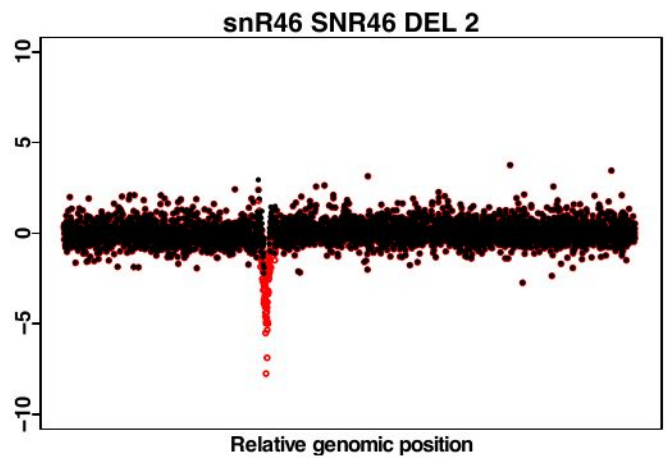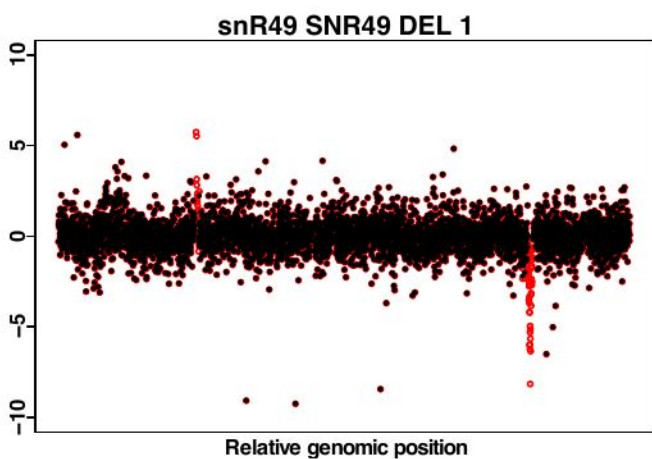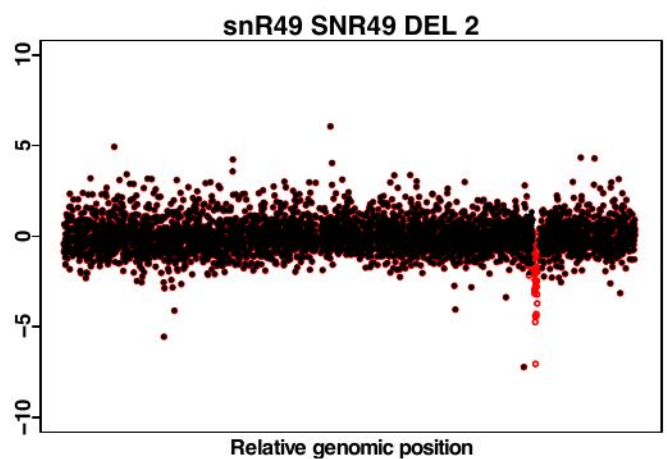

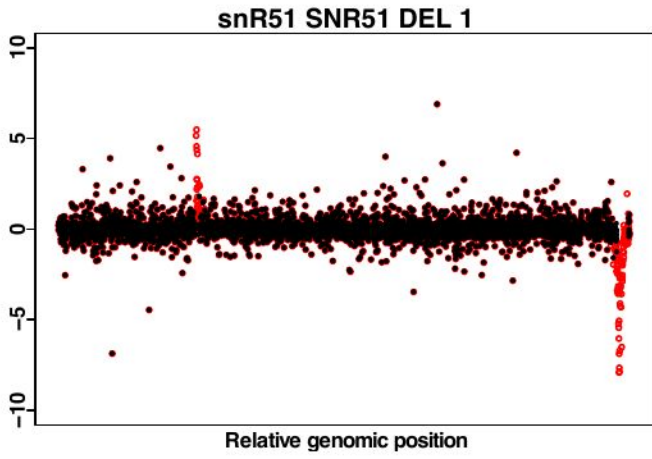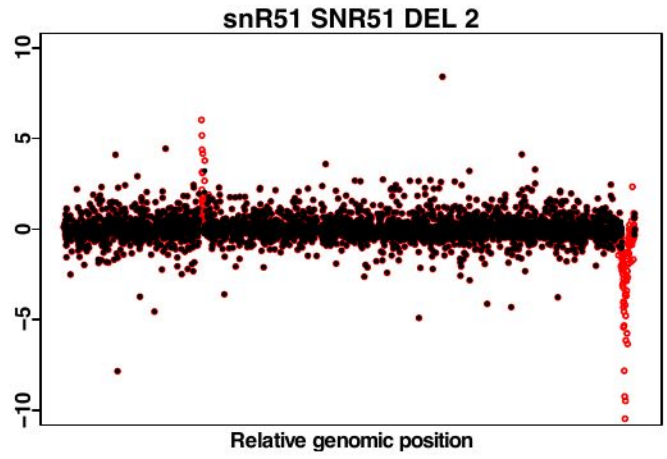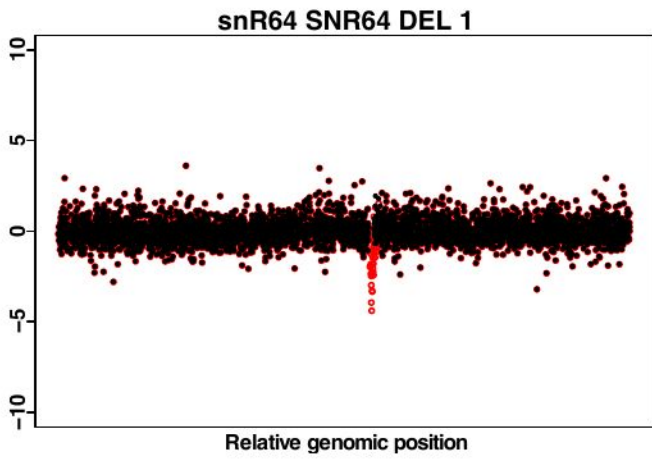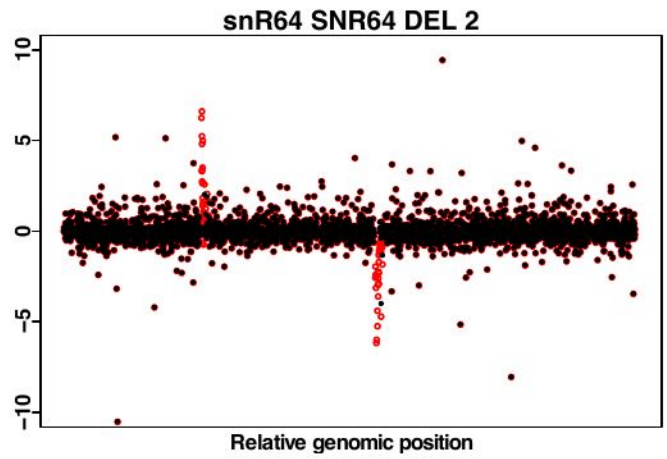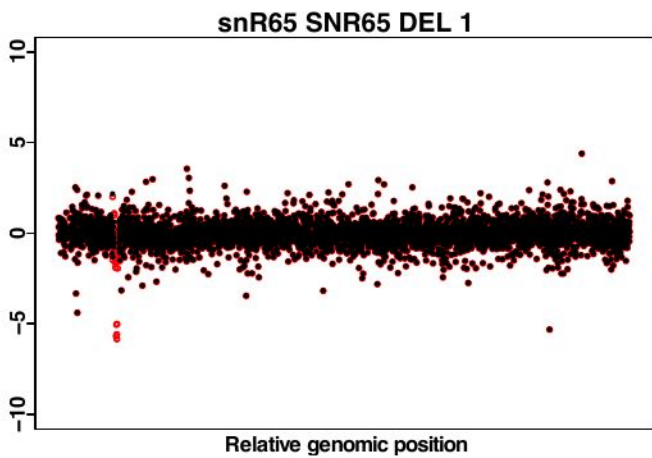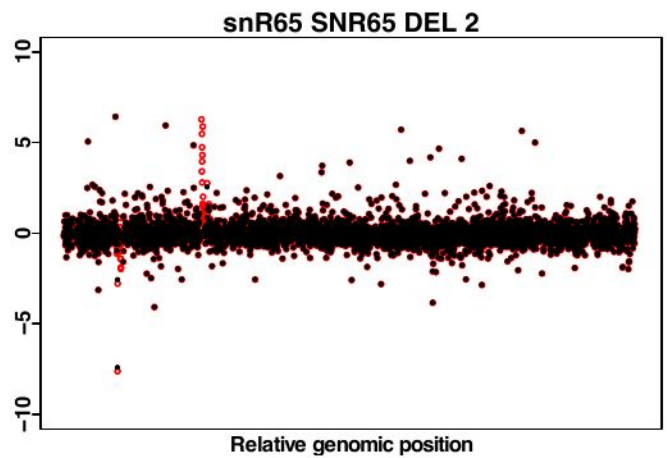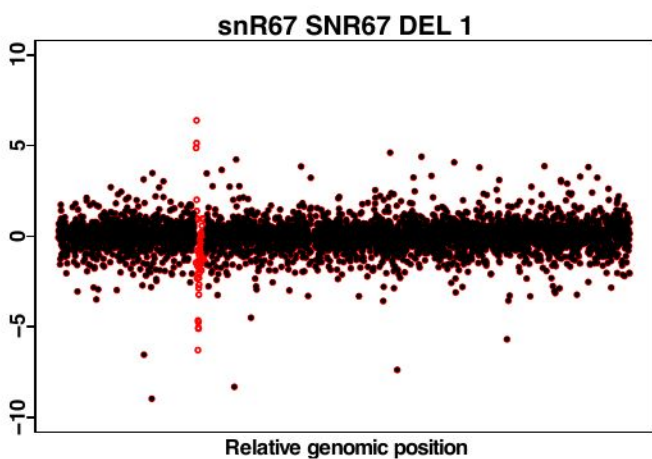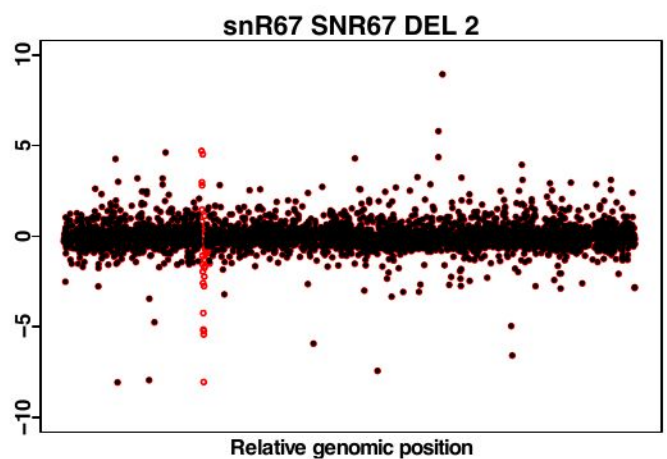



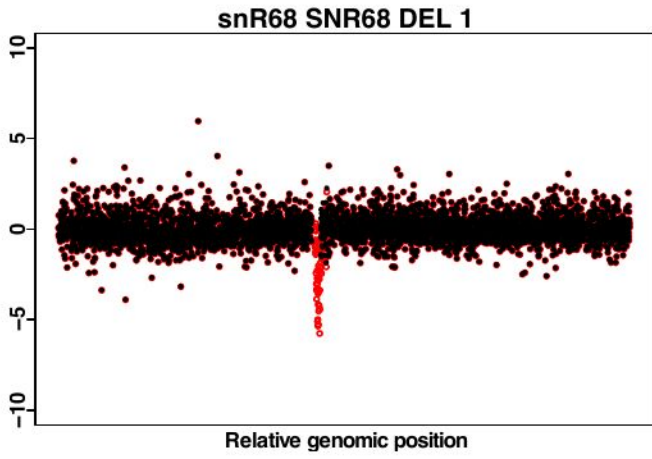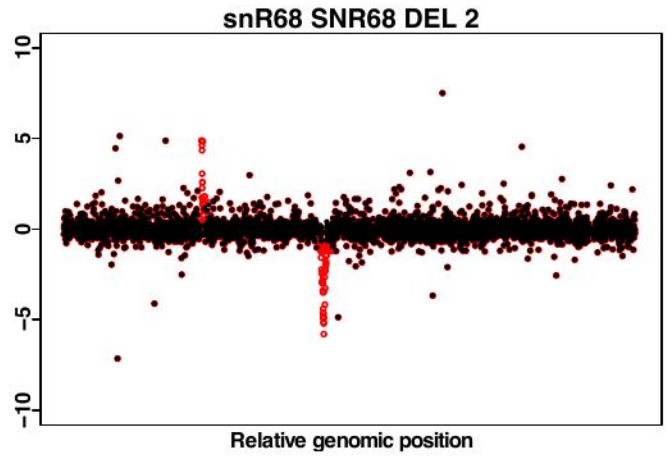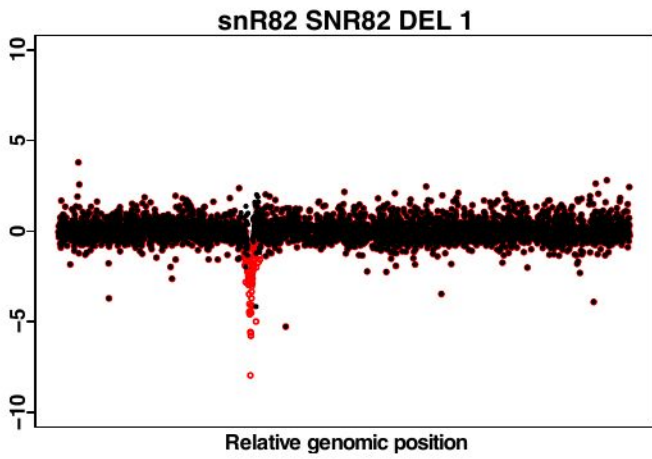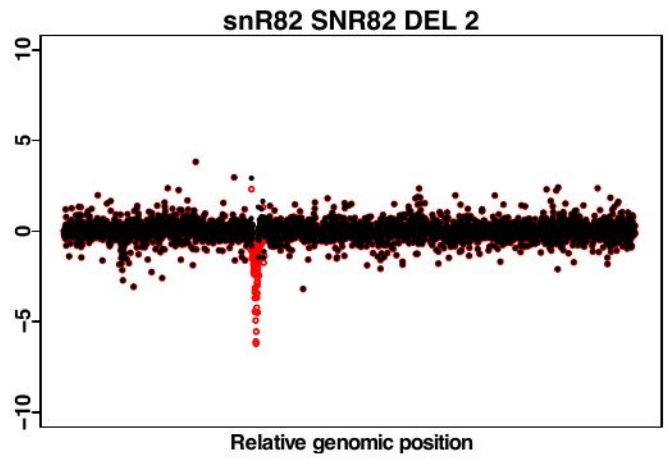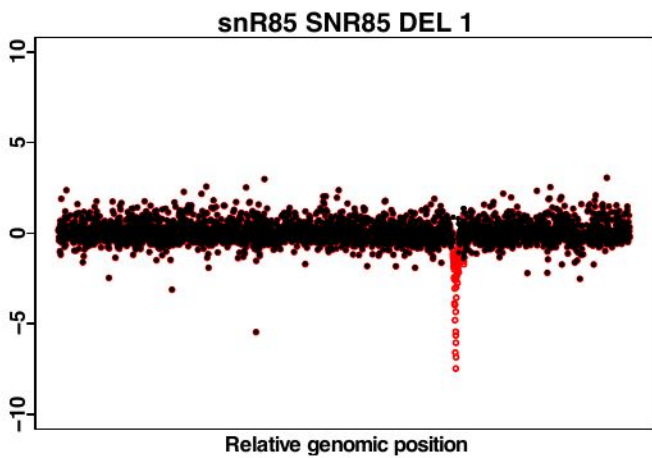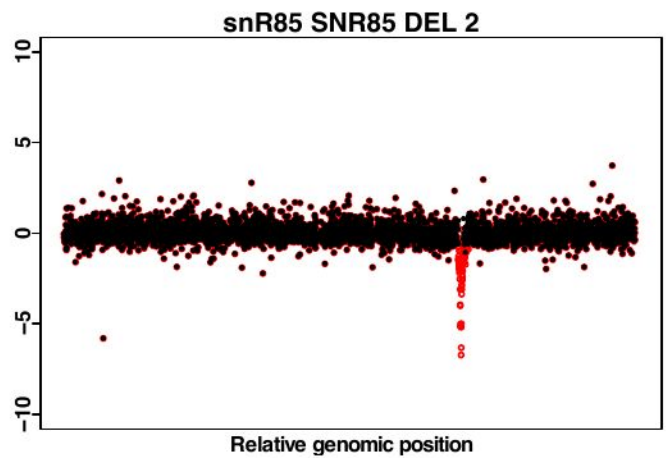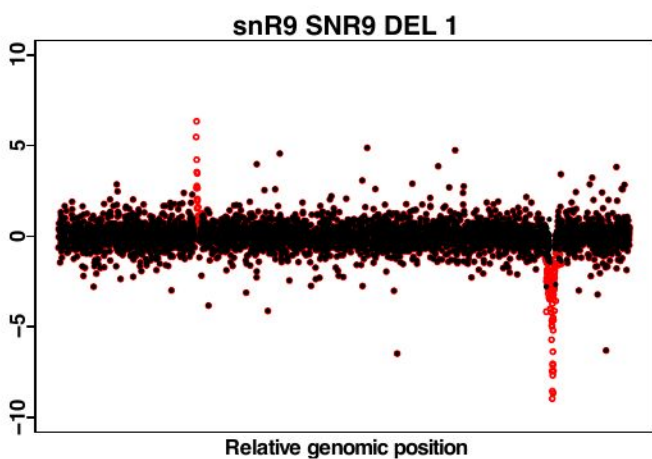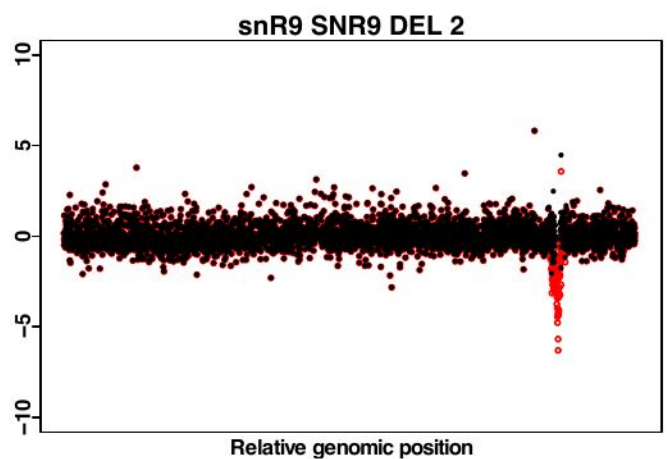

**YBL002W HTB2 DEL 1**

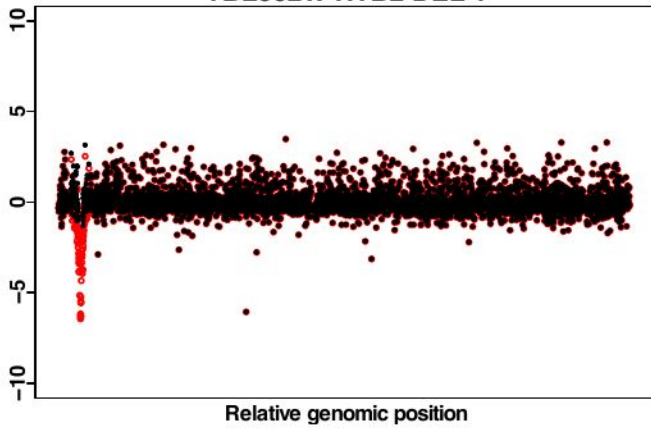

**YBL002W HTB2 DEL 2**

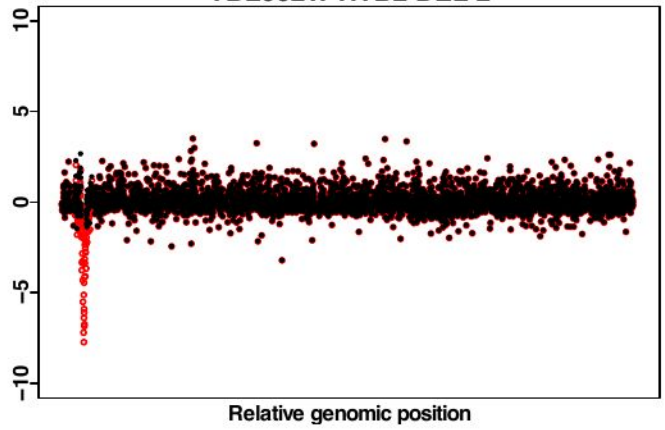

**YBL028C YBL028C DEL 1**

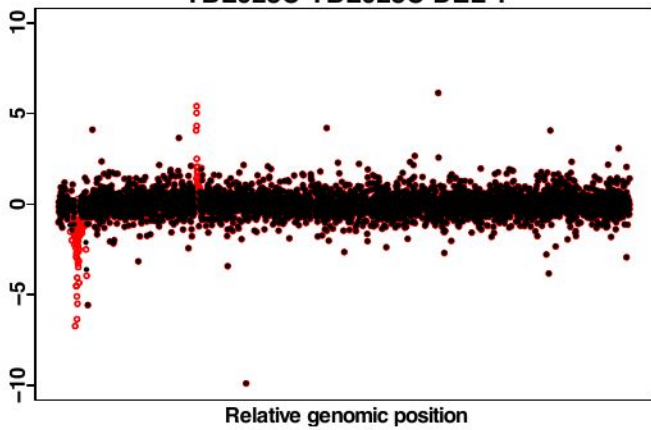

**YBL028C YBL028C DEL 2**

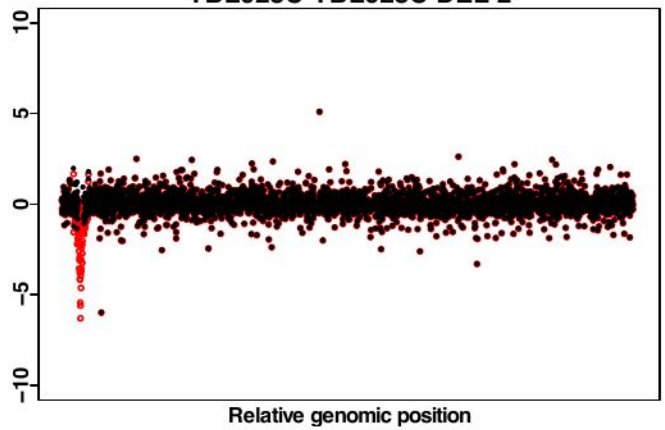

**YBL051C PIN4 DEL 1**

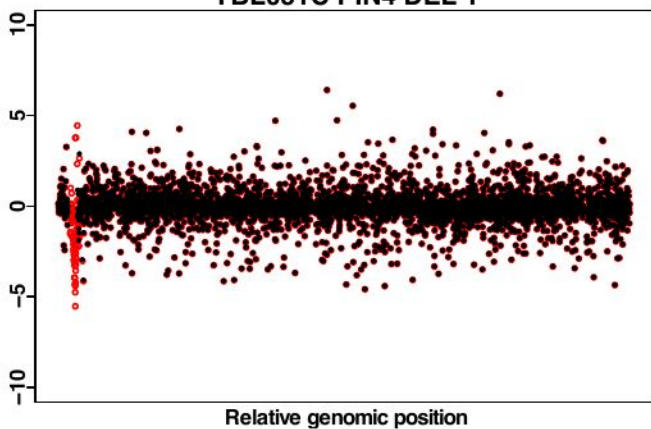

**YBL051C PIN4 DEL 2**

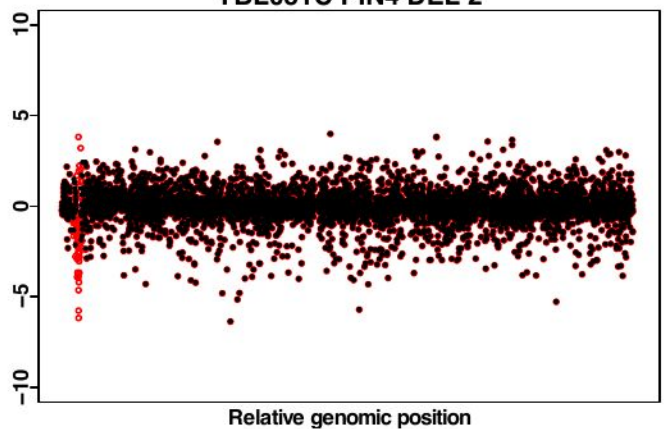

**YBR069C TAT1 DEL 1**

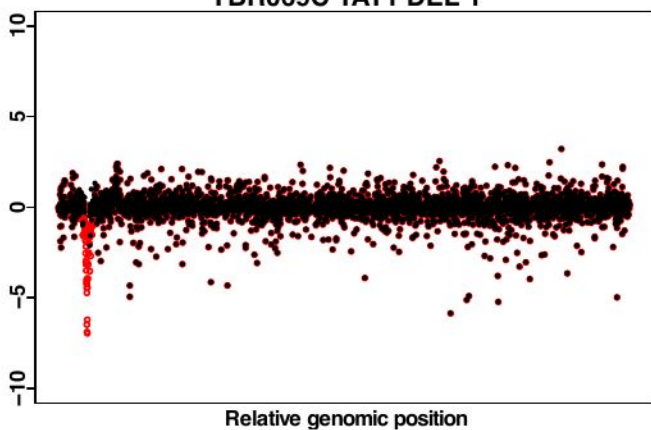

**YBR069C TAT1 DEL 2**

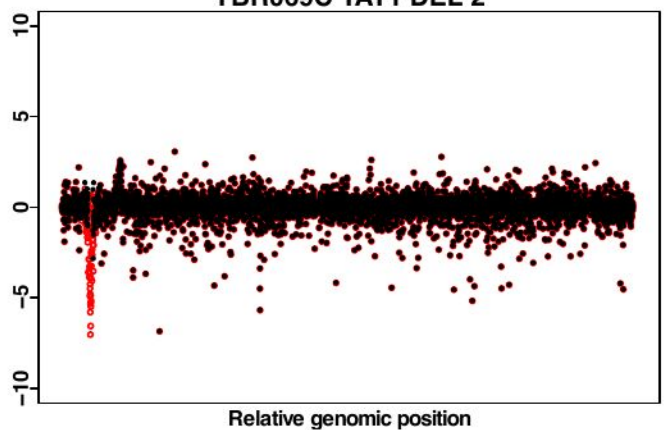

**YBR094W PBY1 DEL 1**

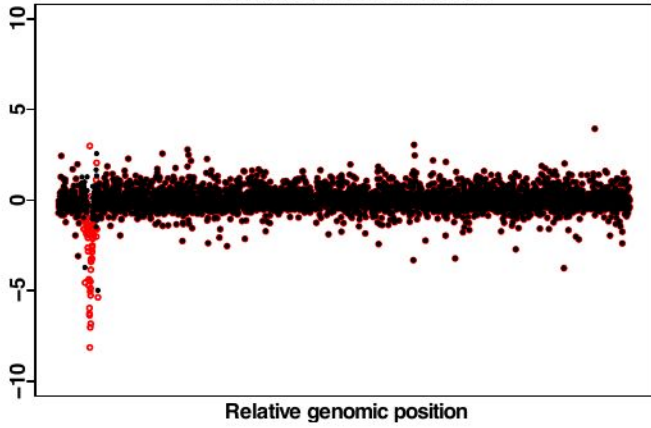

**YBR094W PBY1 DEL 2**

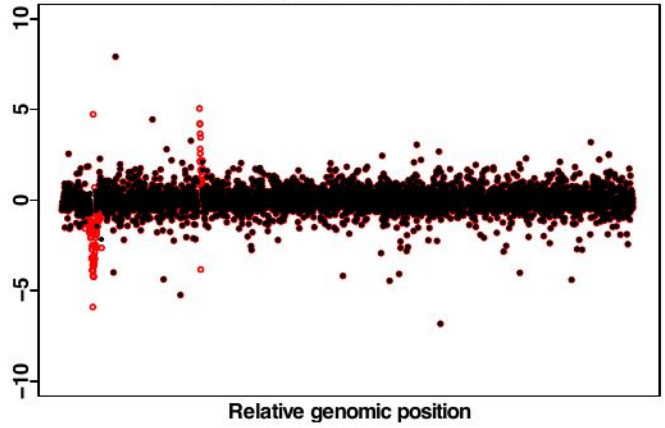

**YBR255W MTC4 DEL 1**

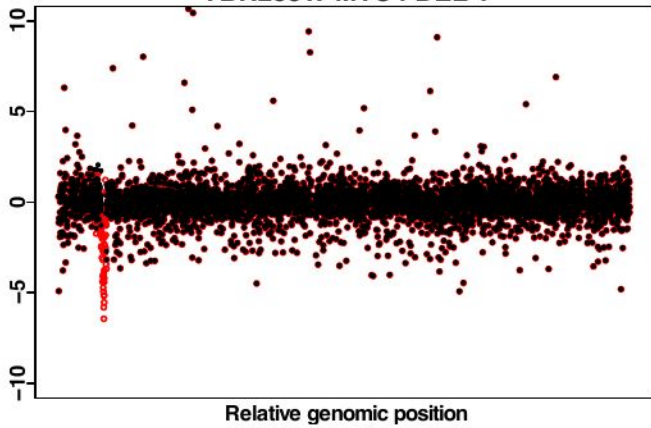

**YBR255W MTC4 DEL 2**

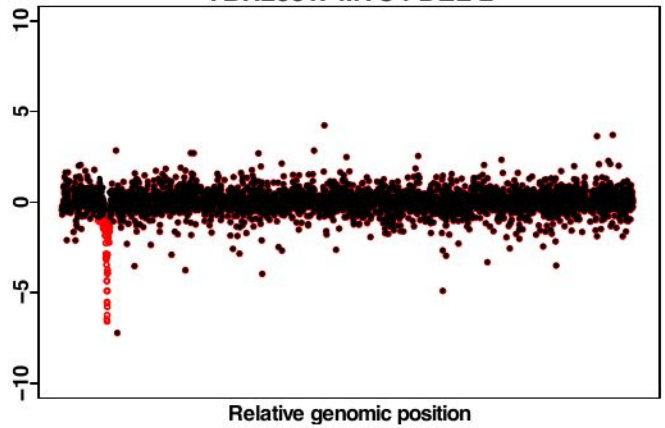

**YBR255W MTC4 DEL 3**

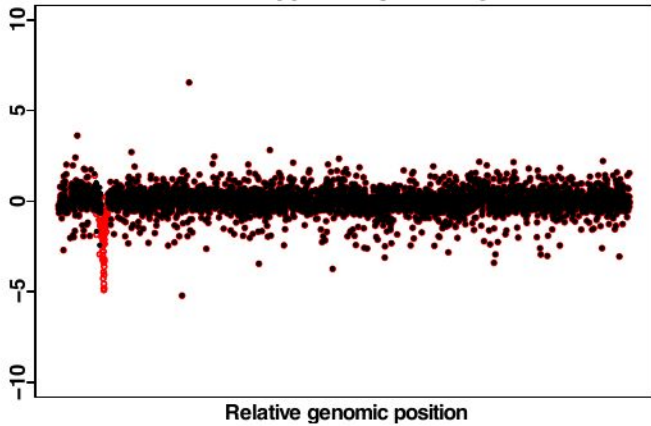

**YBR281C DUG2 DEL 1**

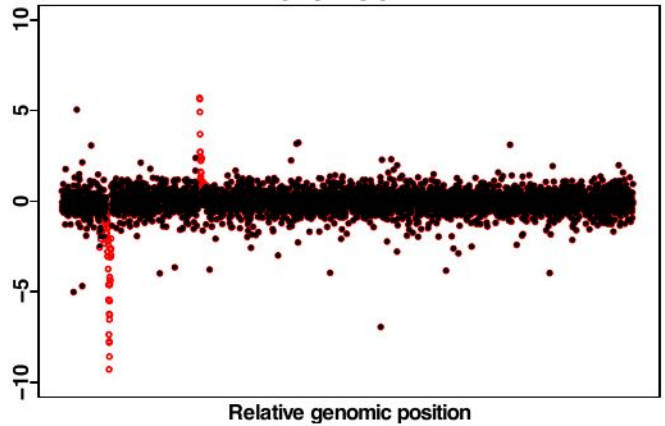

**YBR281C DUG2 DEL 2**

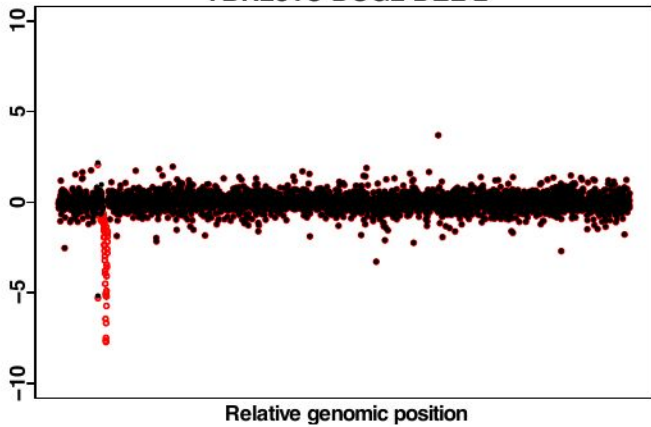

**YCL001W.A YCL001W.A DEL 1**

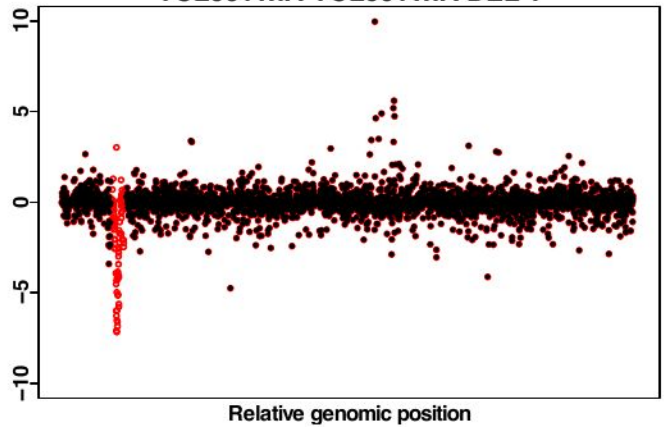



YCL001W.A YCL001W.A DEL 2

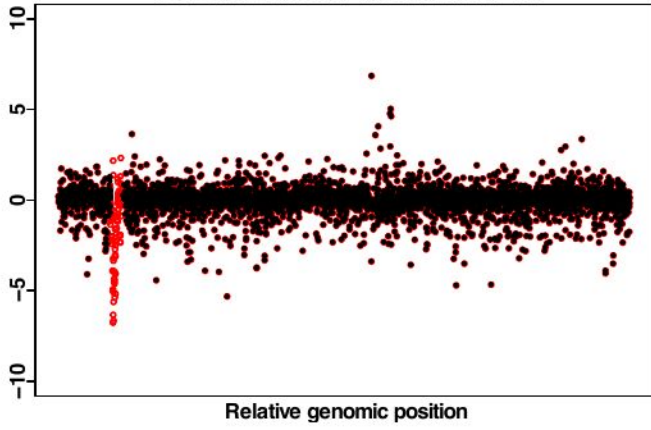

YCL028W RNQ1 DEL 1

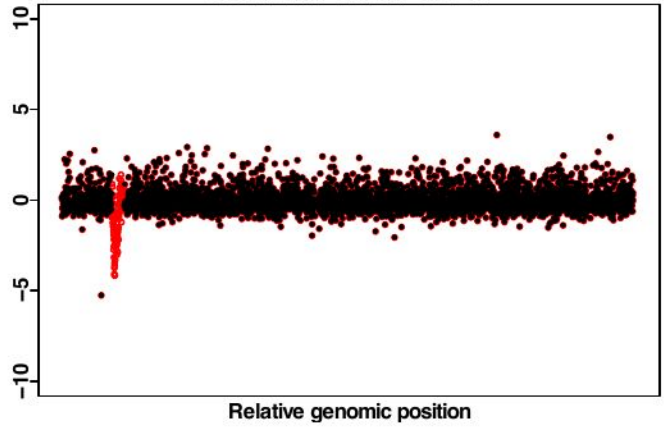

YCL028W RNQ1 DEL 2

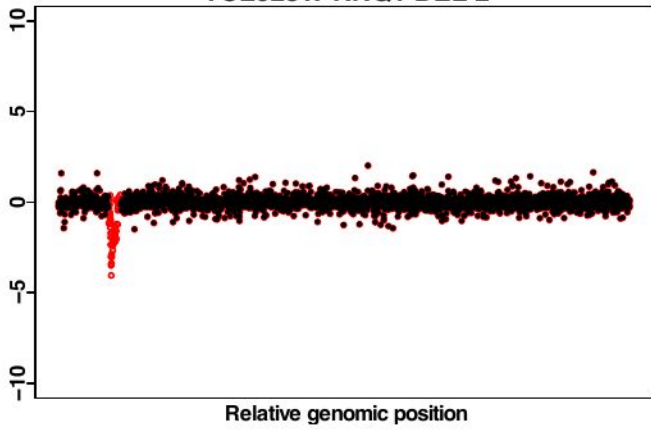

YCL037C SRO9 DEL 1

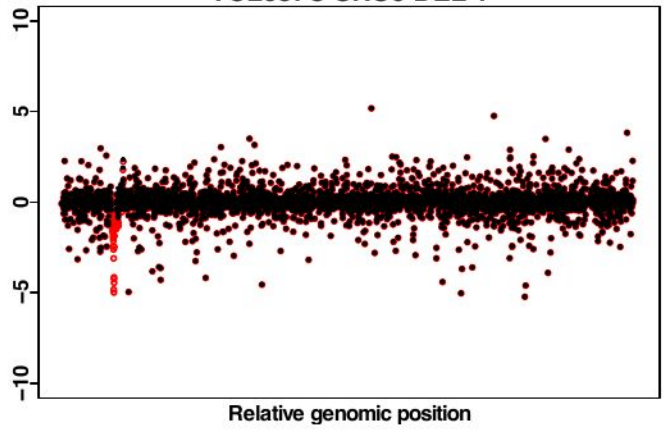

YCL037C SRO9 DEL 2

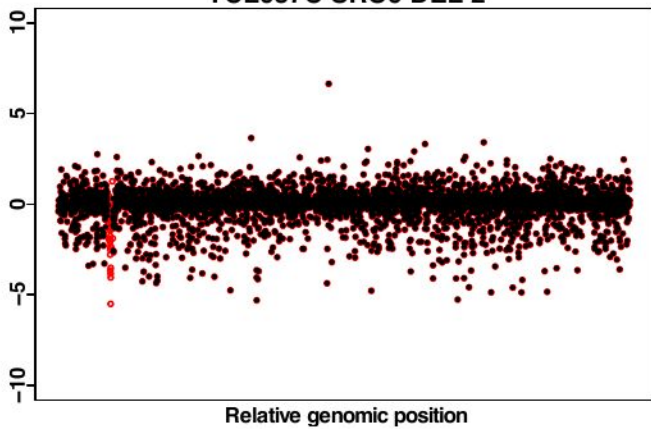

YCR016W YCR016W DEL 1

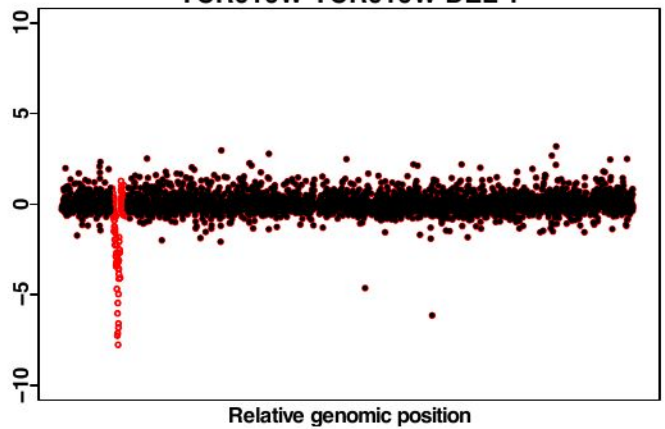

YCR016W YCR016W DEL 2

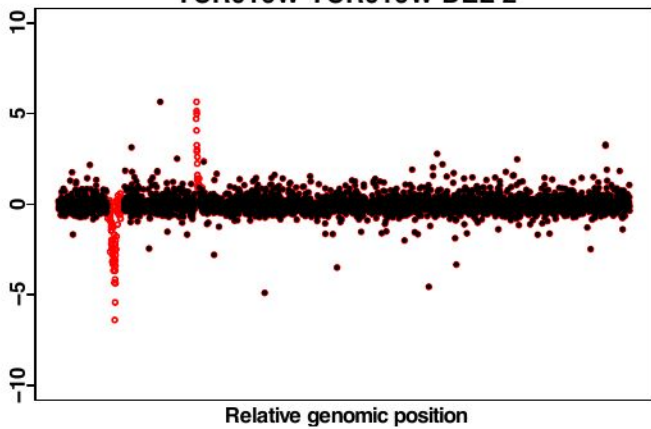

YCR031C RPS14A DEL 1

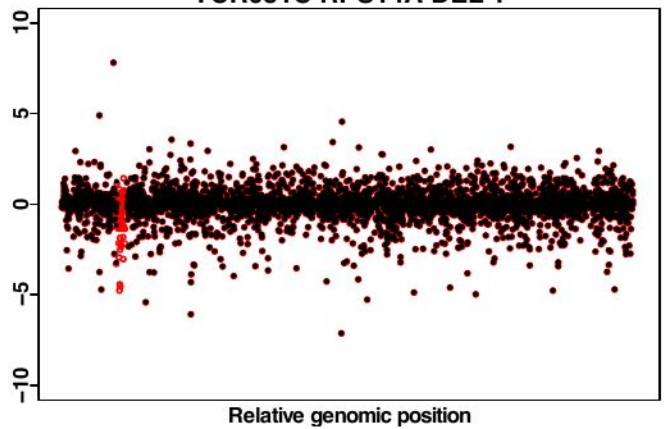



YCR031C RPS14A DEL 2

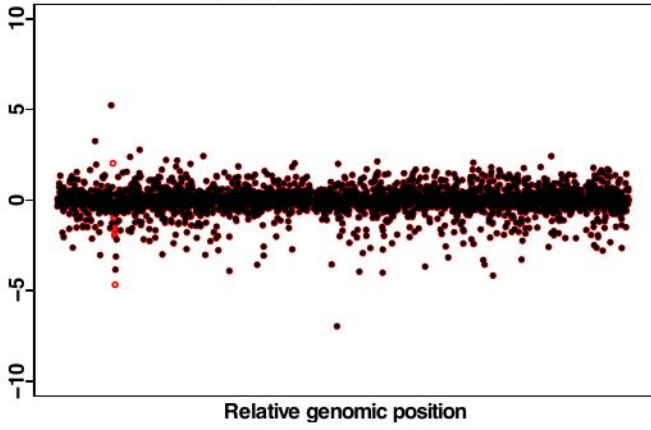

YCR053W THR4 DEL 1

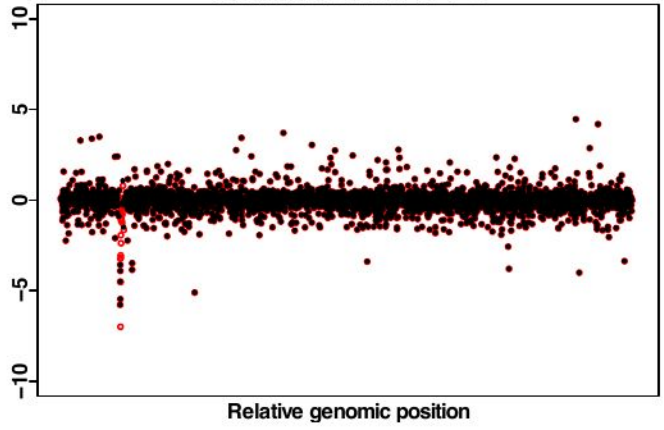

YCR053W THR4 DEL 2

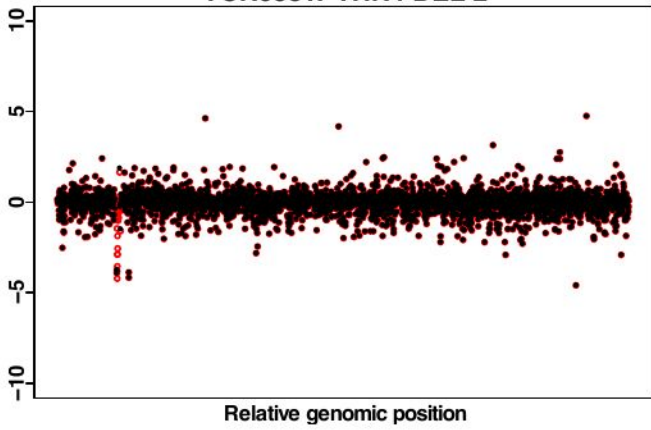

YCR076C FUB1 DEL 1

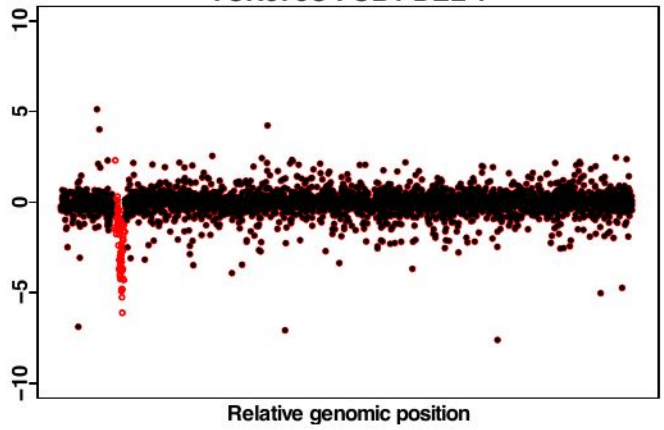

YCR076C FUB1 DEL 2

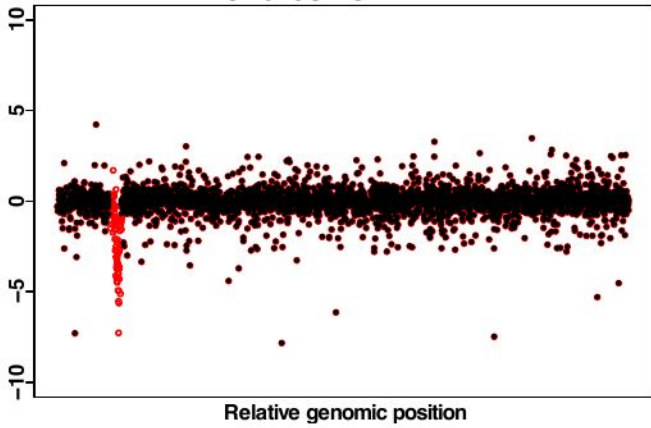

YCR076C FUB1 DEL 3

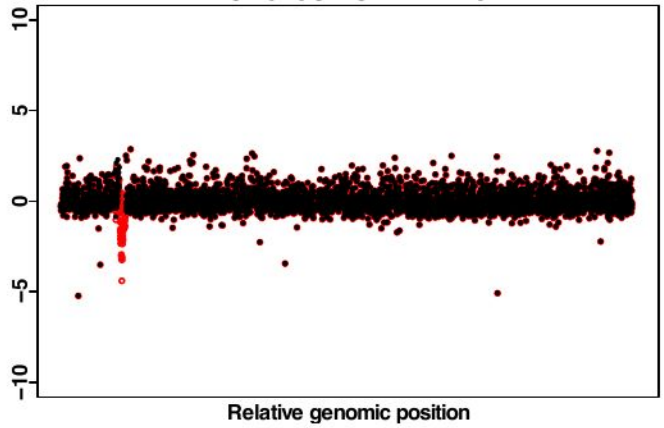

YDL006W PTC1 DEL 1

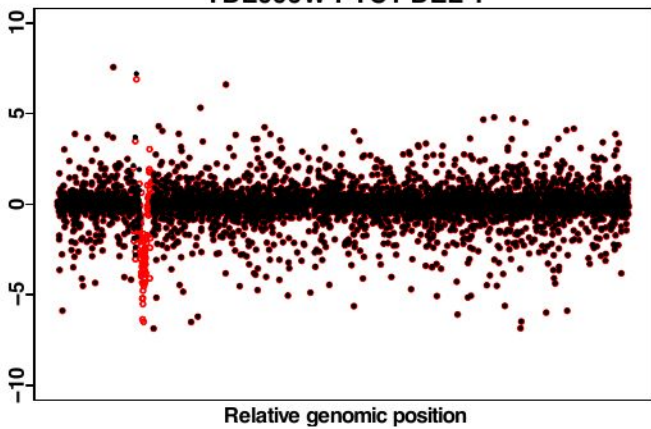

YDL006W PTC1 DEL 2

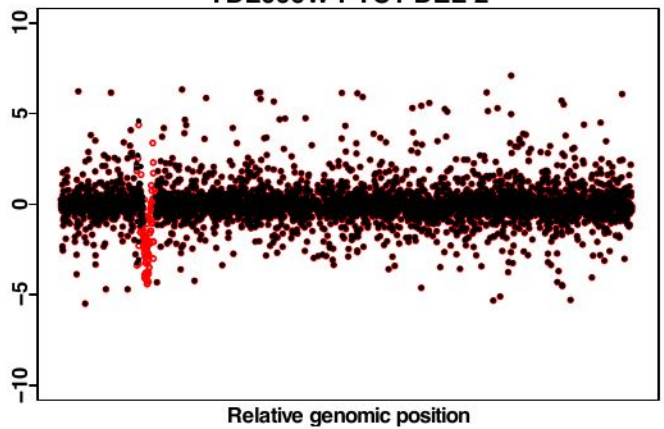

**YDL014W NOP1 DAMP 1**

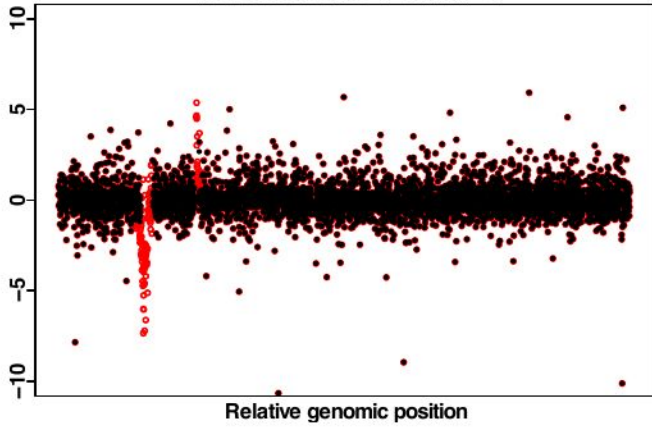

**YDL014W NOP1 DAMP 2**

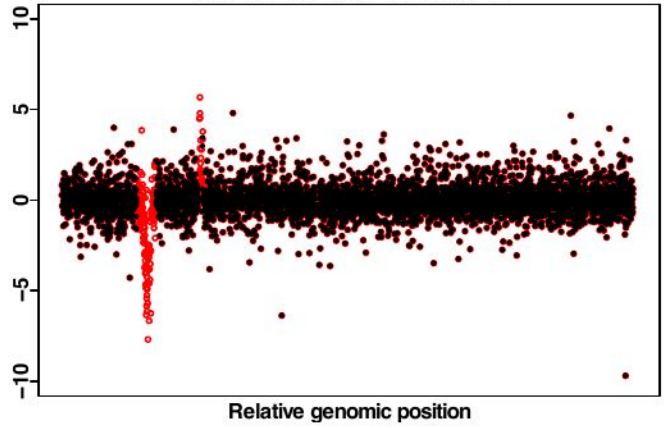

**YDL014W NOP1 DAMP 3**

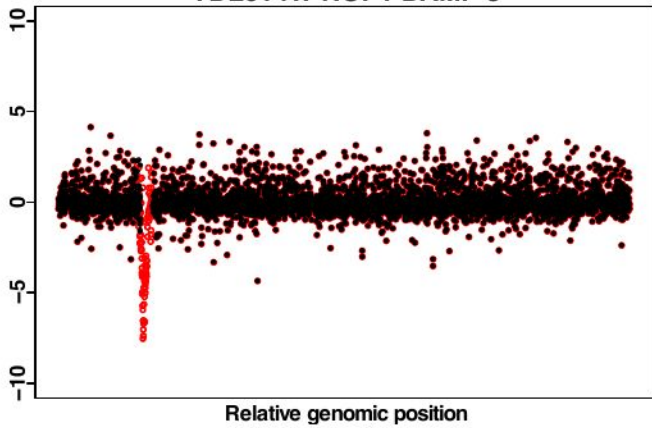

**YDL020C RPN4 DEL 1**

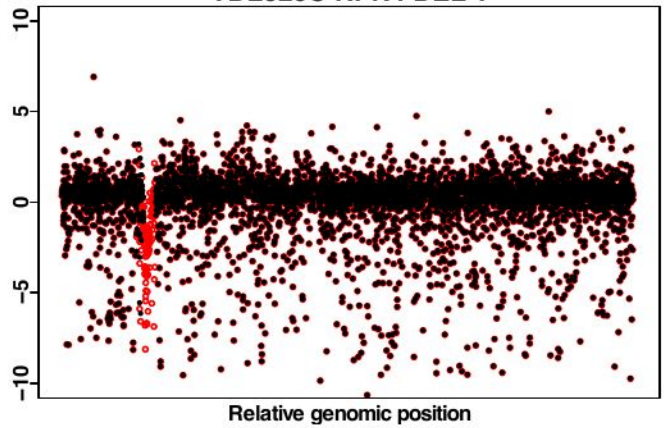

**YDL020C RPN4 DEL 2**

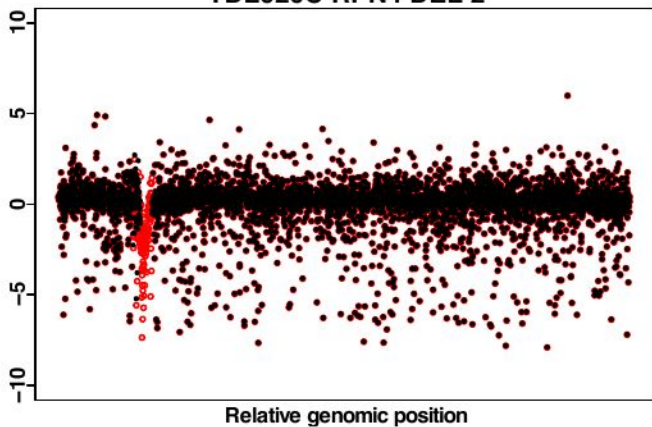

**YDL100C GET3 DEL 1**

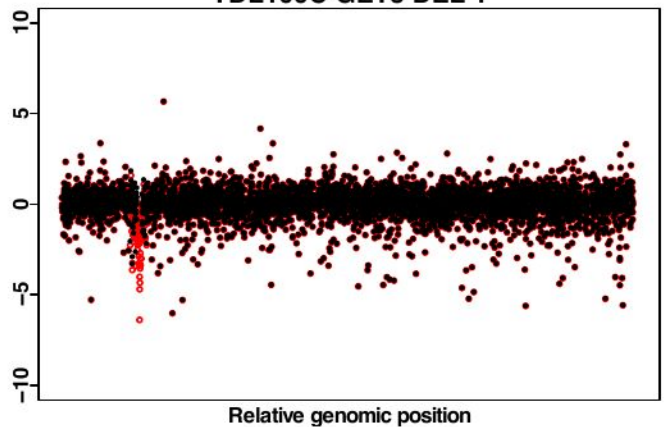

**YDL100C GET3 DEL 2**

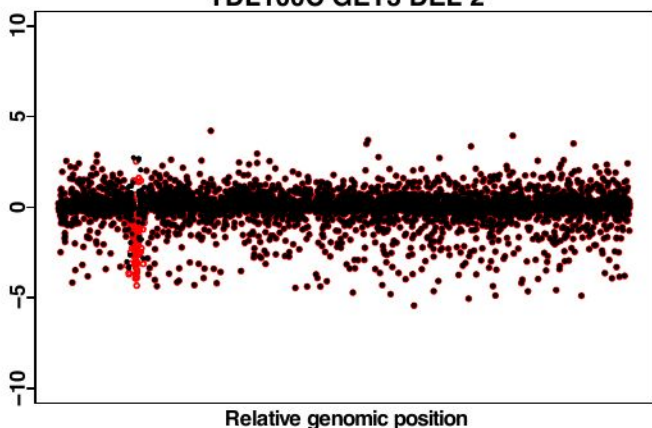

**YDL175C AIR2 DEL 1**

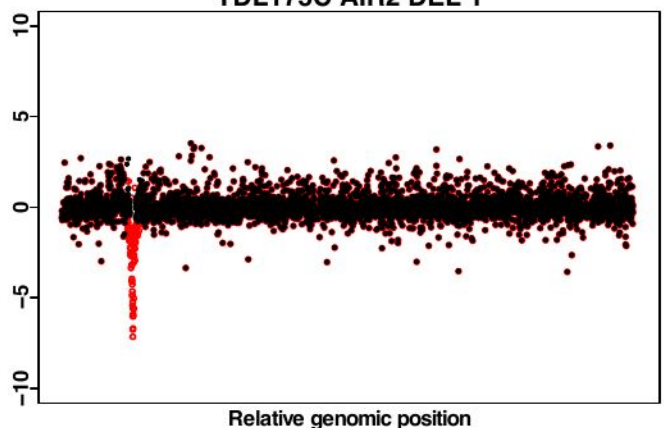



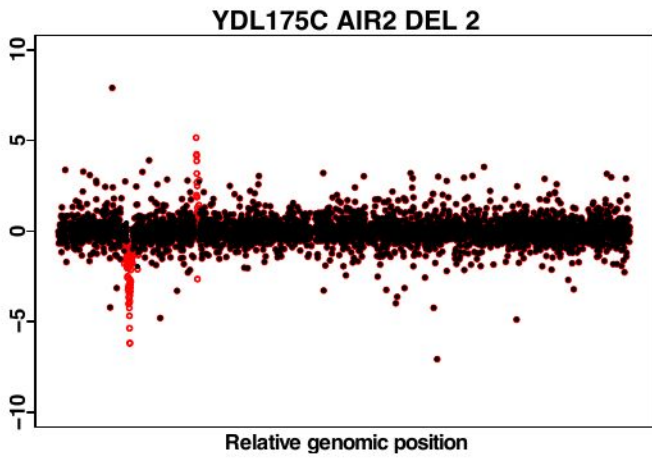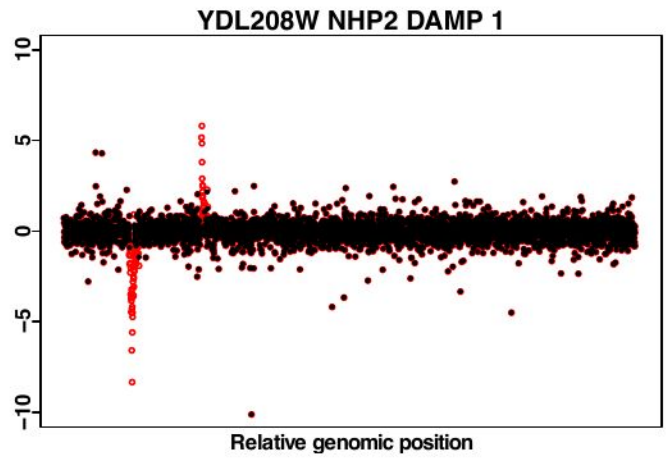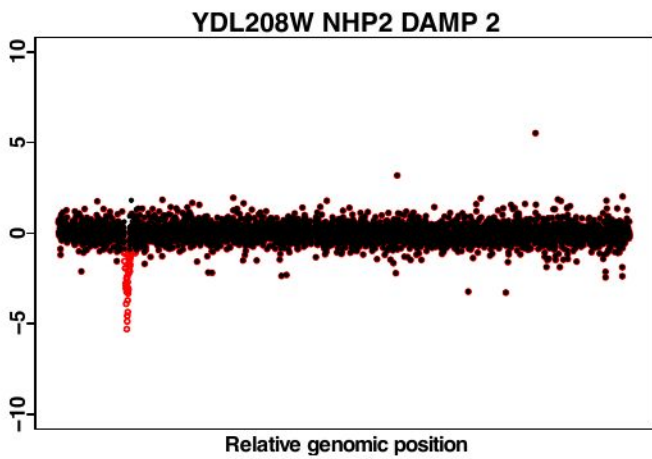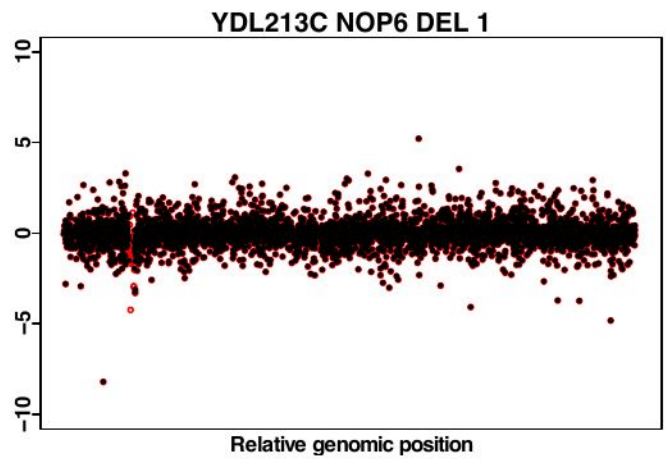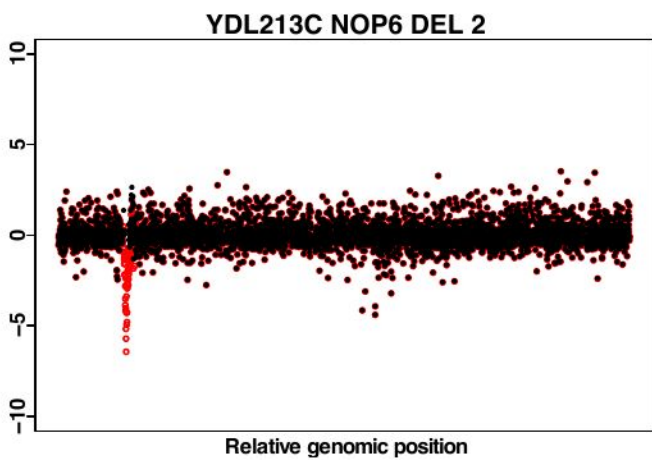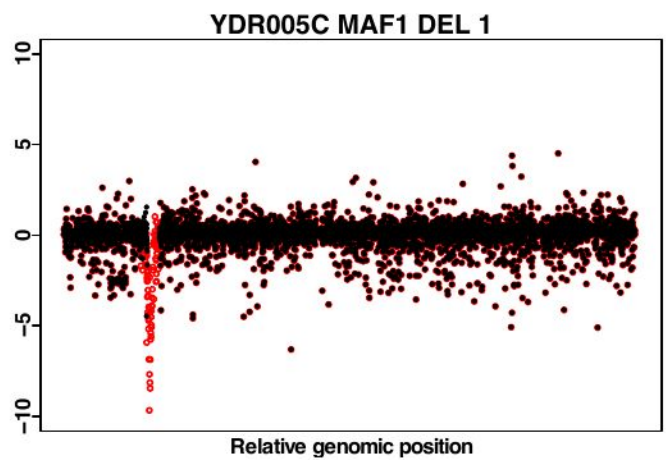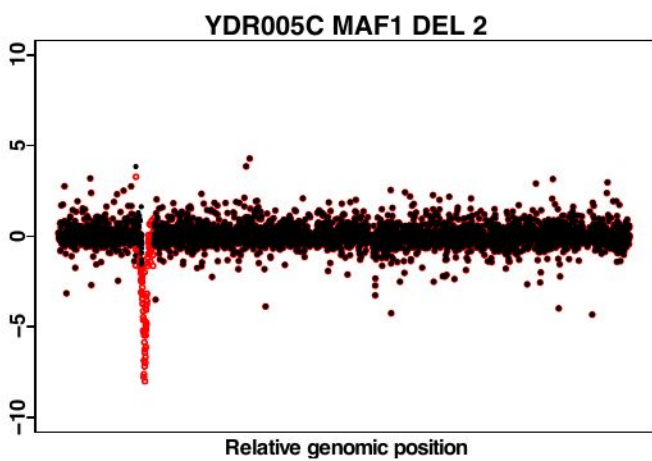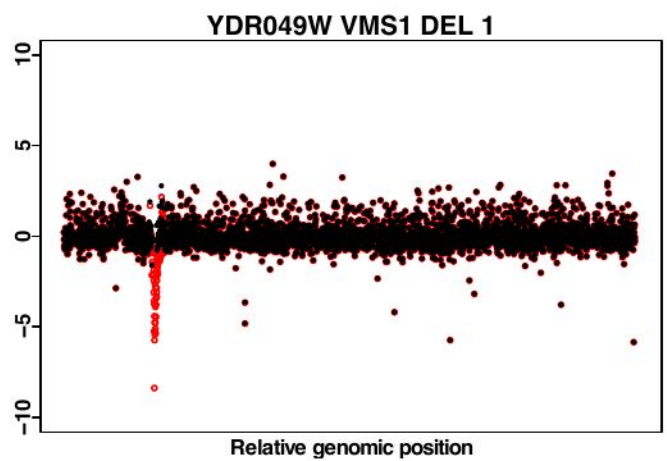

YDR049W VMS1 DEL 2

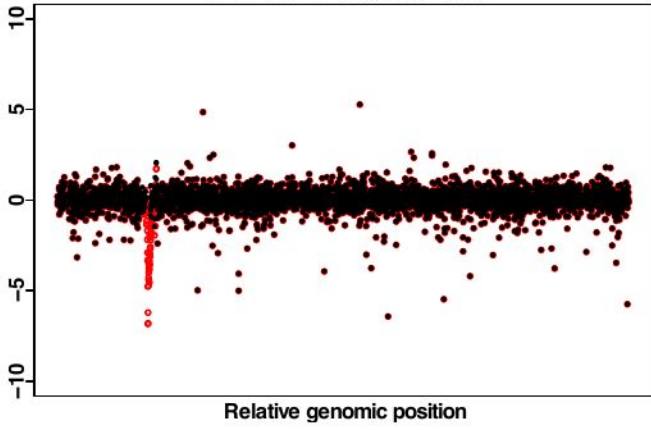

YDR049W VMS1 DEL 3

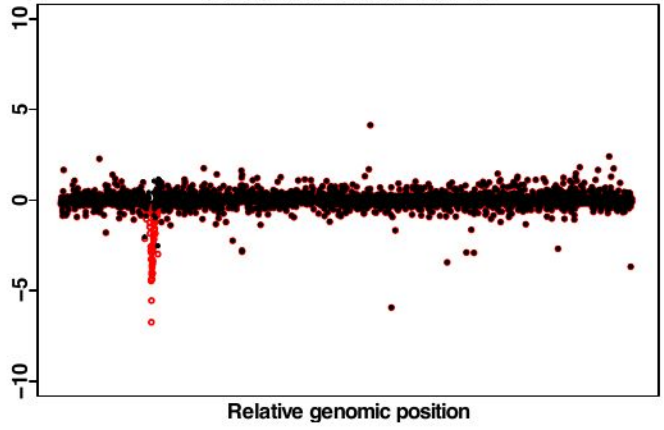

YDR049W VMS1 DEL 4

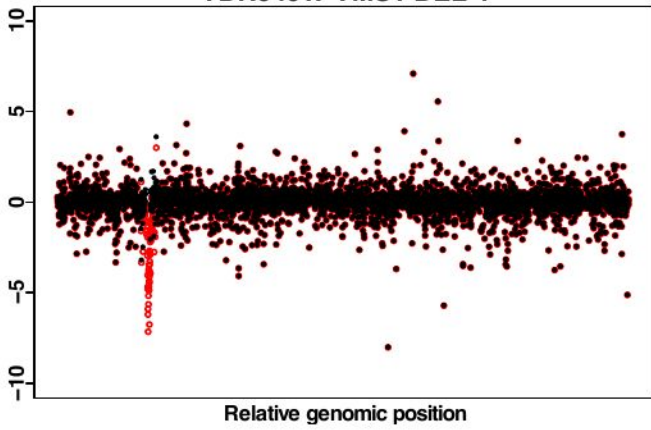

YDR059C UBC5 DEL 1

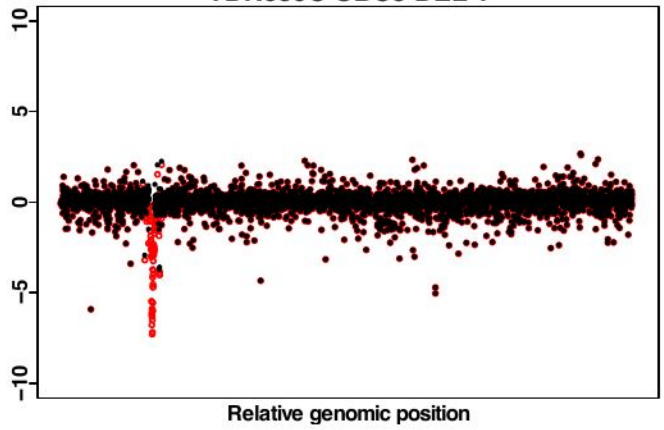

YDR059C UBC5 DEL 2

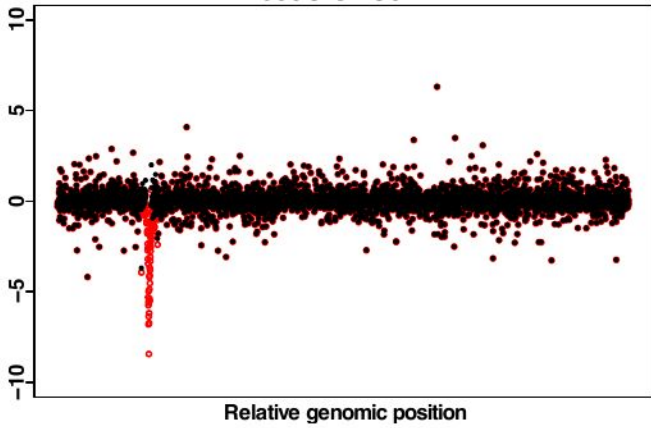

YDR067C OCA6 DEL 1

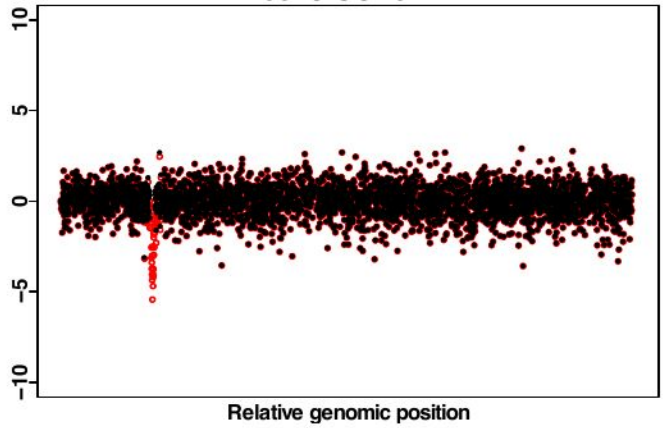

YDR067C OCA6 DEL 2

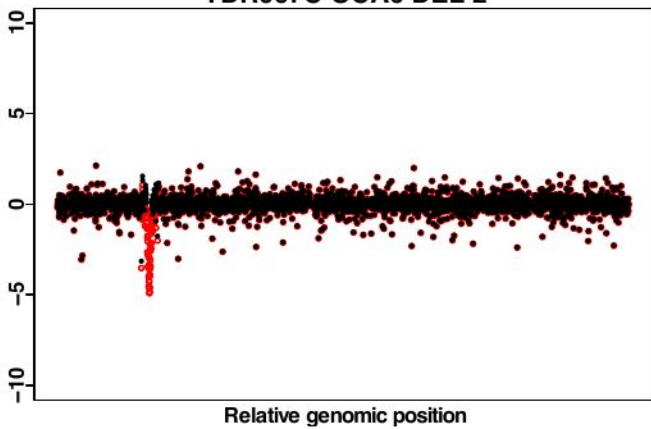

YDR120C TRM1 DEL 1

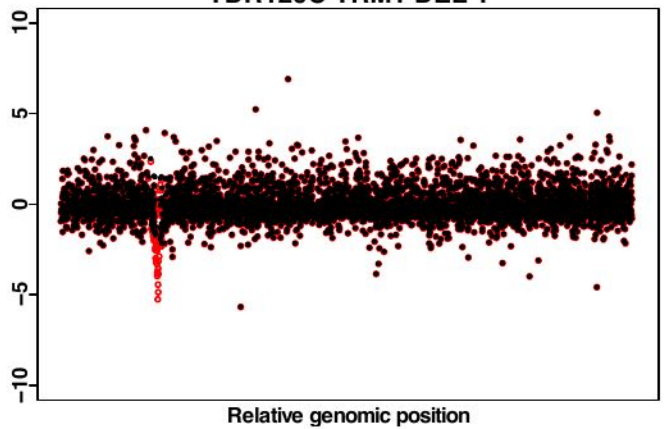



**YDR120C TRM1 DEL 2**

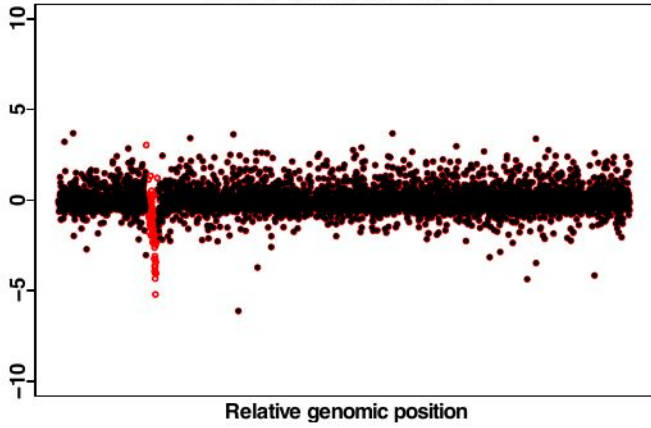

**YDR140W MTQ2 DAMP 1**

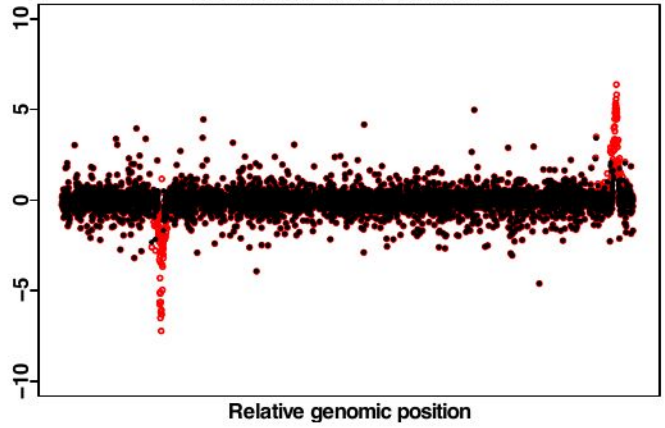

**YDR140W MTQ2 DAMP 2**

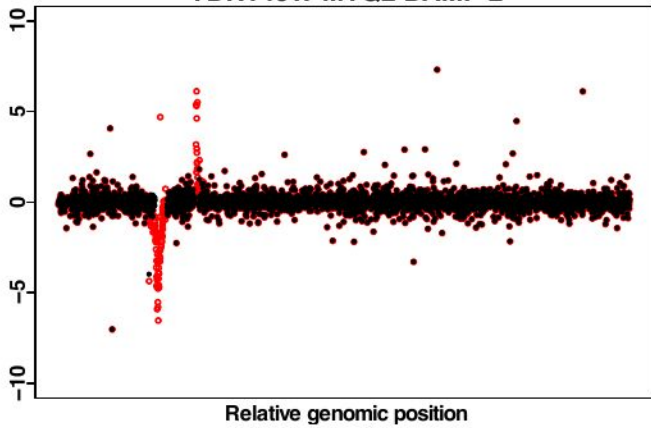

**YDR143C SAN1 DEL 1**

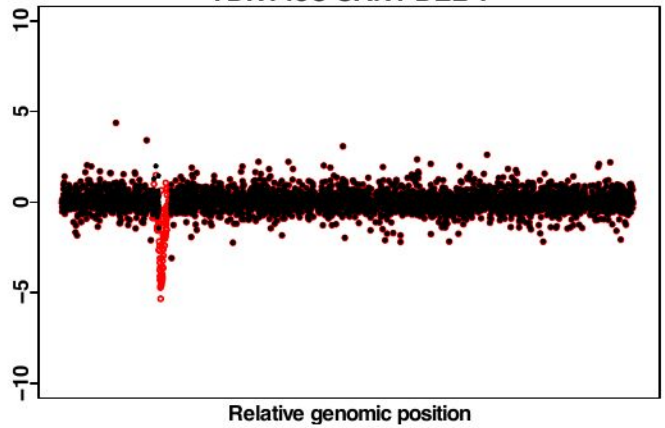

**YDR143C SAN1 DEL 2**

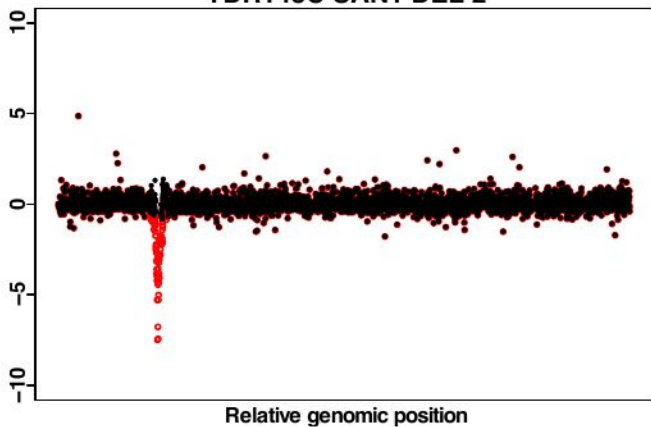

**YDR228C PCF11 DAMP 1**

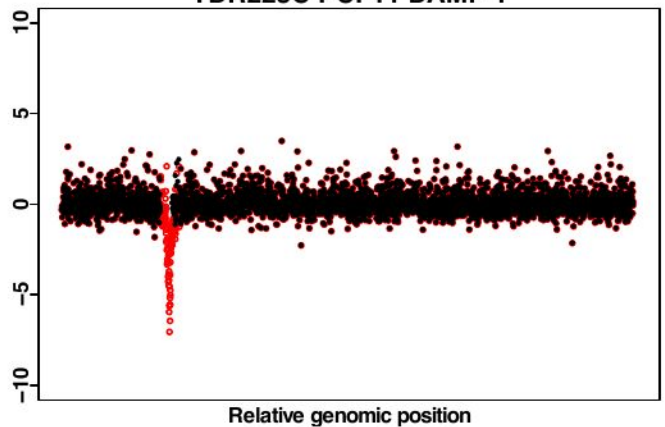

**YDR228C PCF11 DAMP 2**

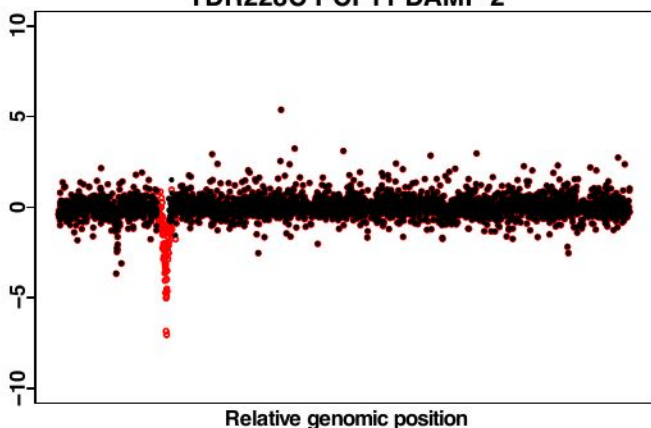

**YDR283C GCN2 DEL 1**

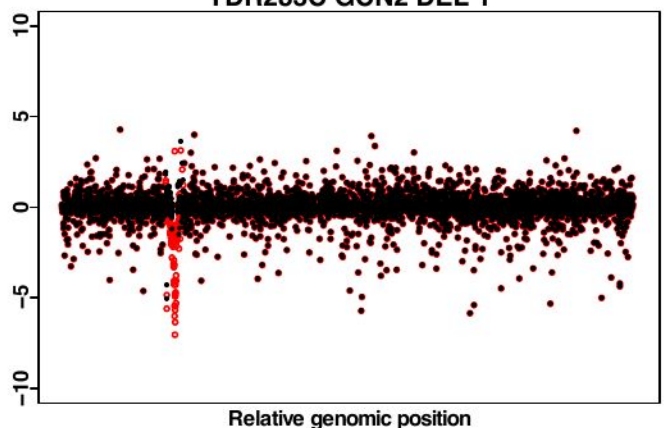

YDR283C GCN2 DEL 2

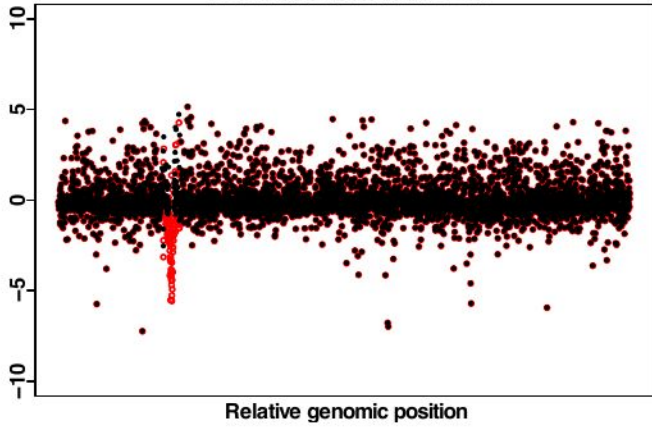

YDR363W.A SEM1 DEL 1

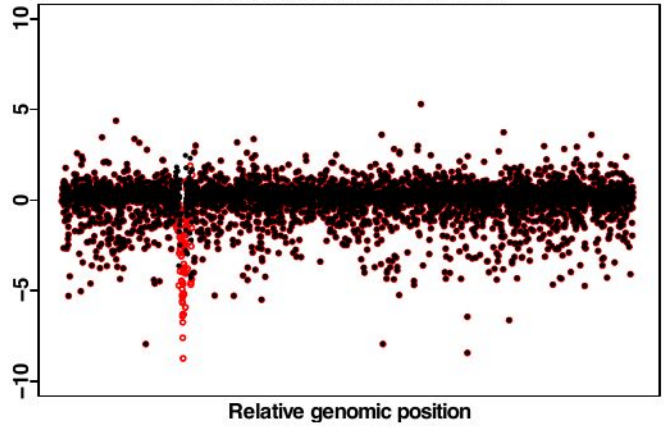

YDR363W.A SEM1 DEL 2

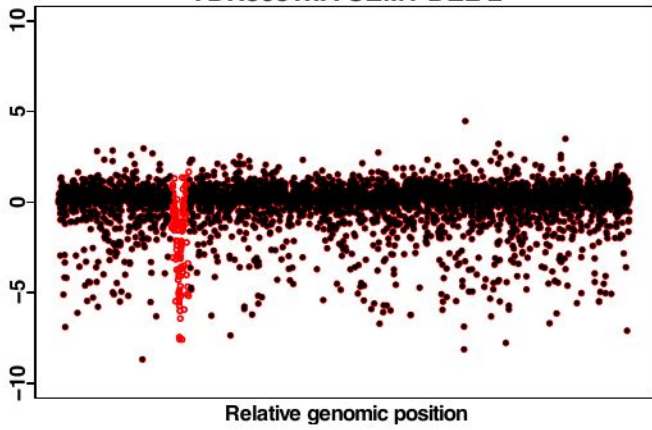

YDR385W EFT2 DEL 1

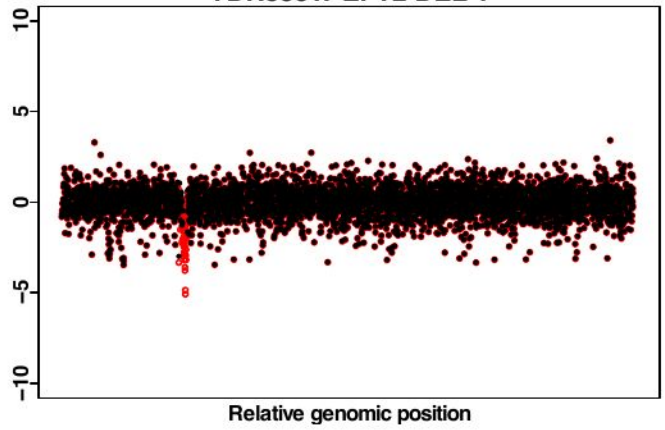

YDR385W EFT2 DEL 2

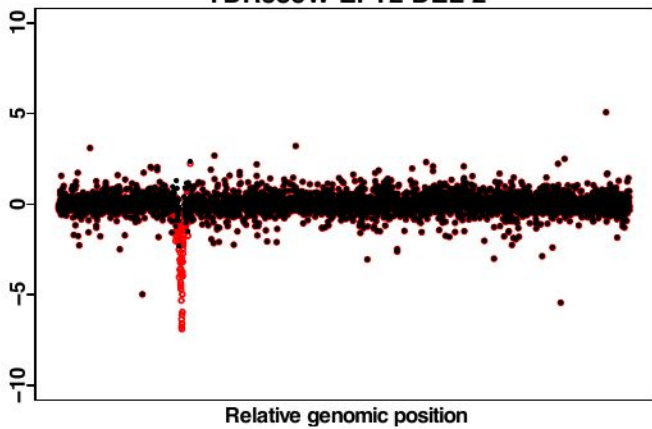

YDR395W SXM1 DEL 1

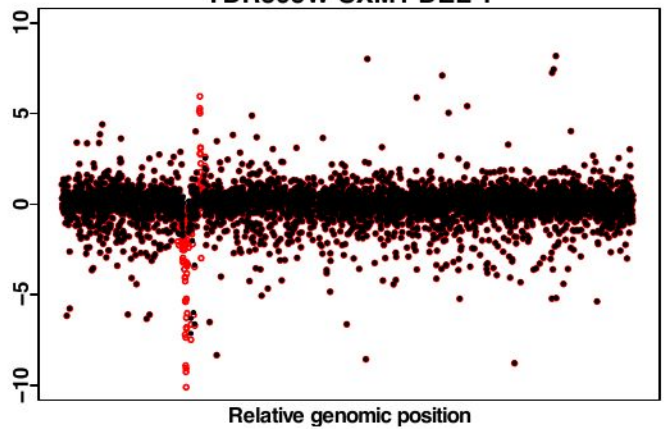

YDR395W SXM1 DEL 2

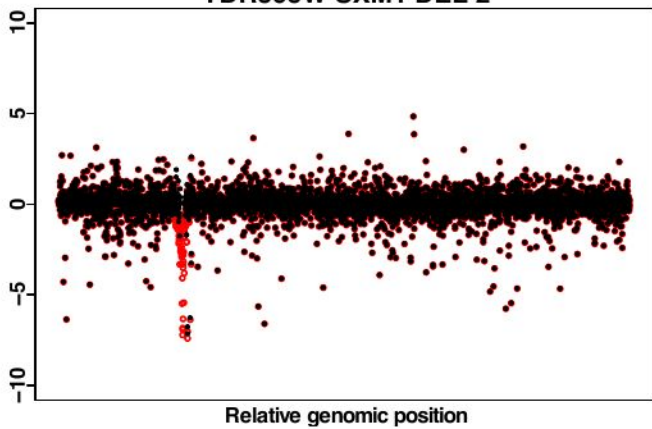

YDR395W SXM1 DEL 3

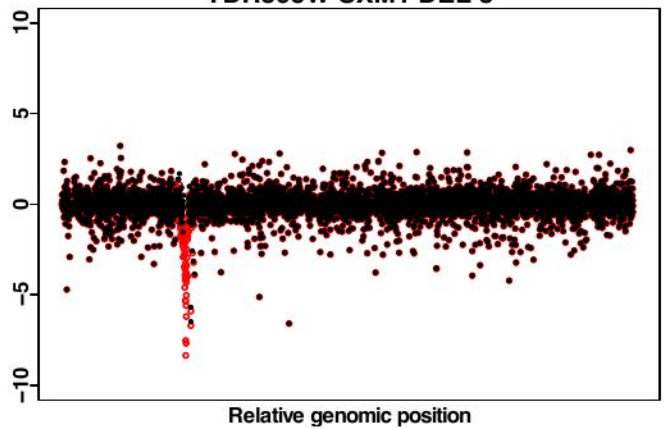



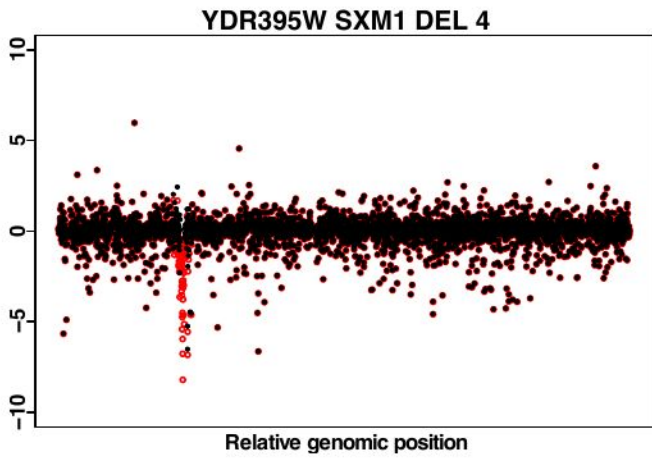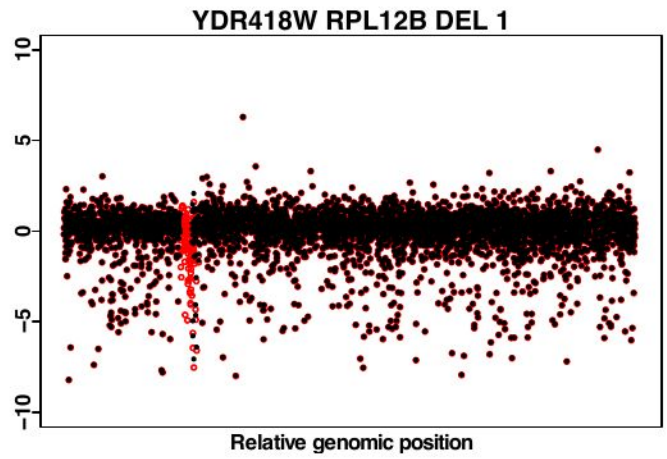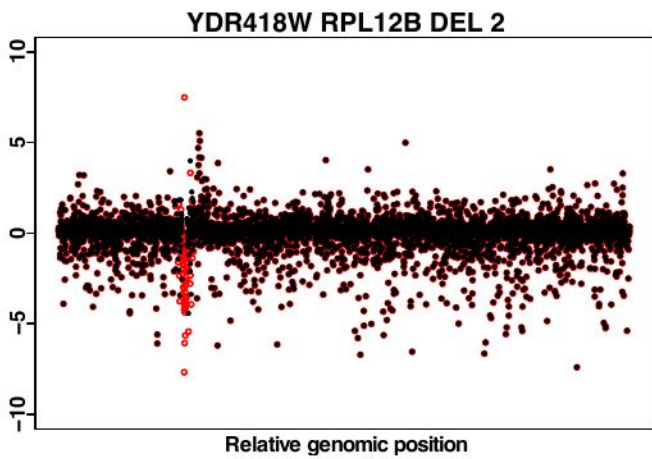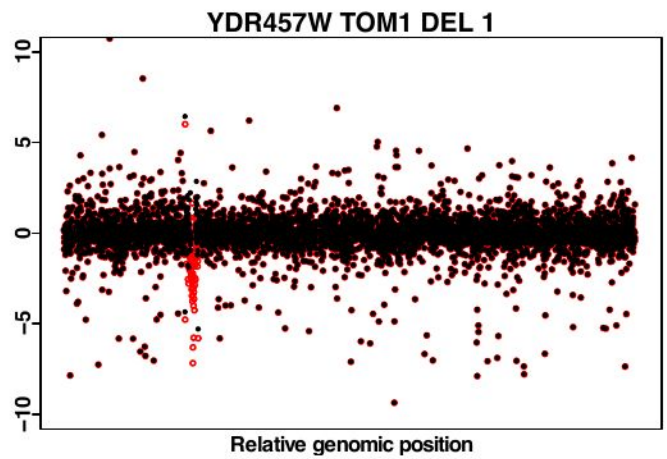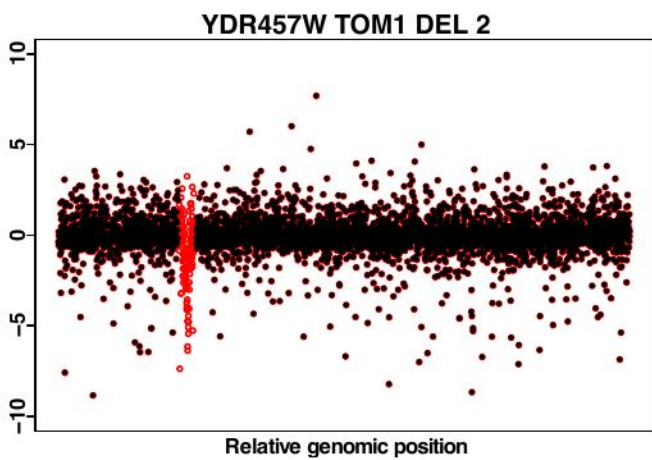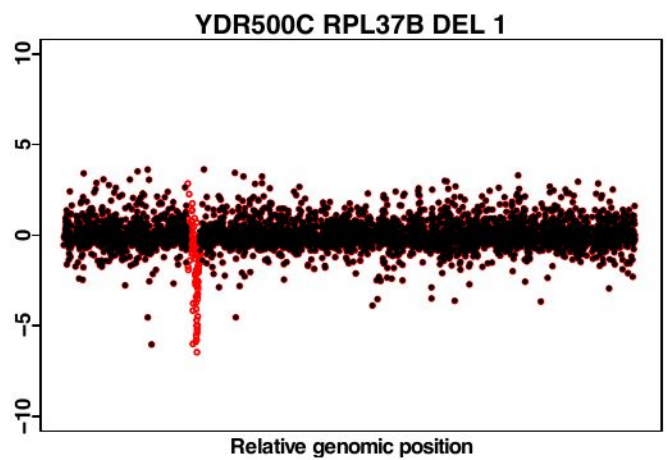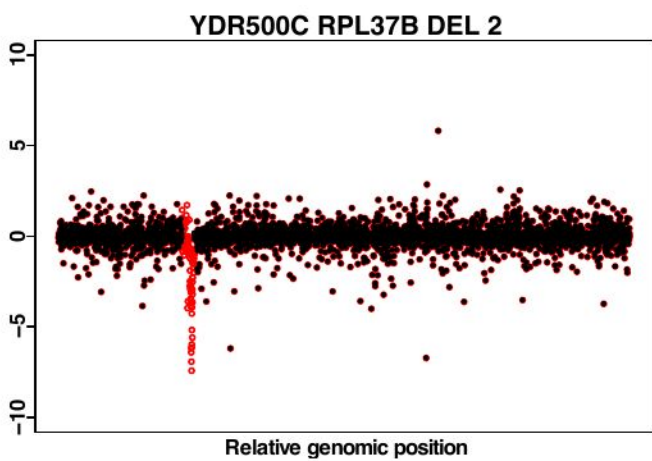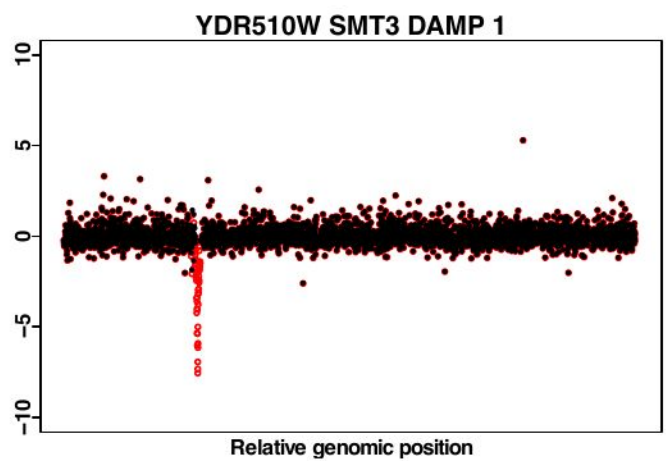

YDR510W SMT3 DAMP 2

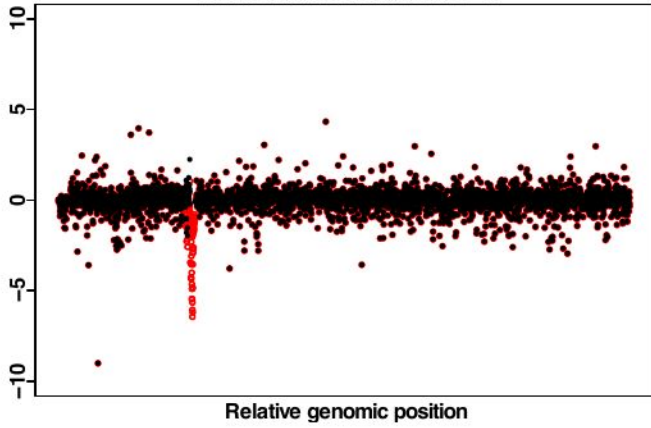

YEL003W GIM4 DEL 1

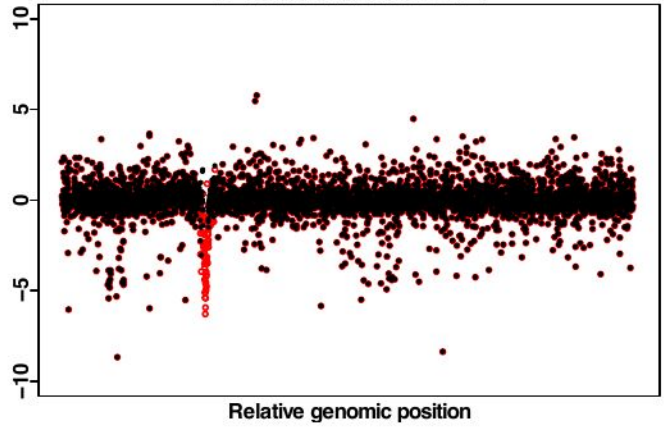

YEL003W GIM4 DEL 2

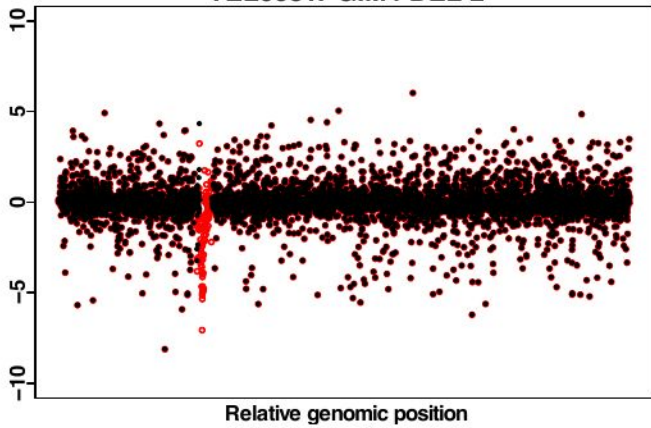

YEL009C GCN4 DEL 1

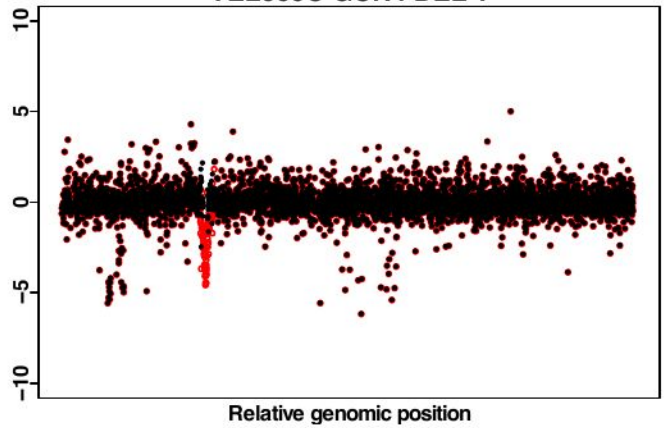

YEL009C GCN4 DEL 2

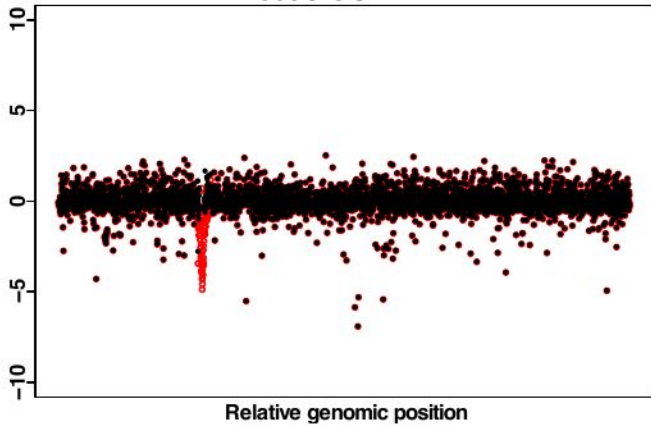

YER010C YER010C DEL 1

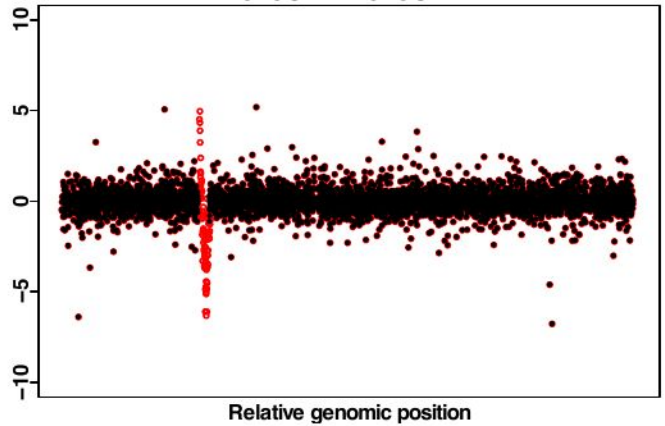

YER010C YER010C DEL 2

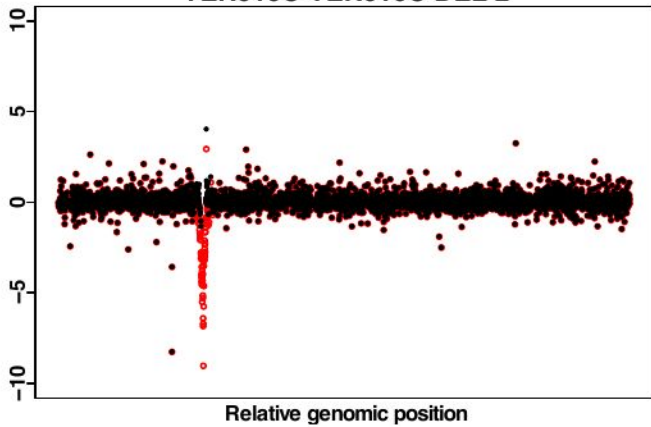

YER035W EDC2 DEL 1

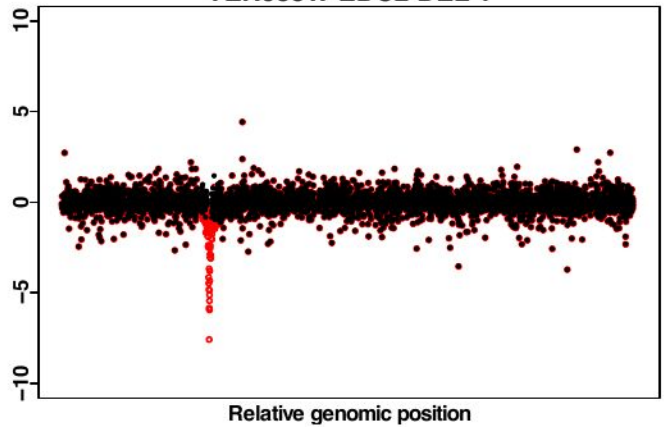



YER035W EDC2 DEL 2

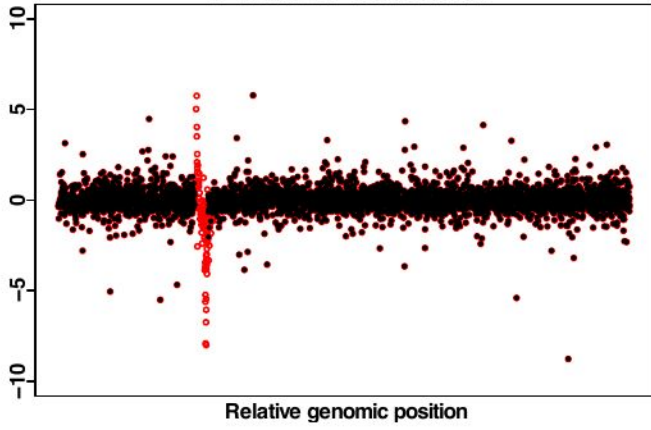

YER048C CAJ1 DEL 1

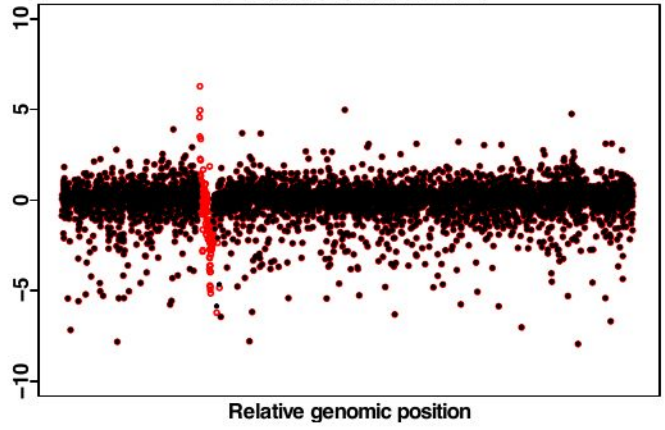

YER048C CAJ1 DEL 2

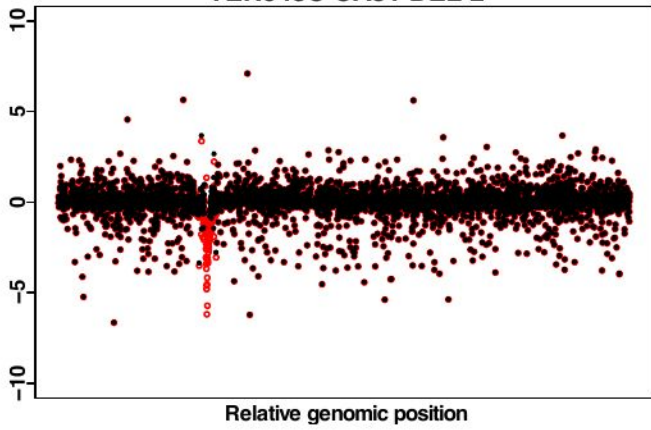

YFL044C OTU1 DEL 1

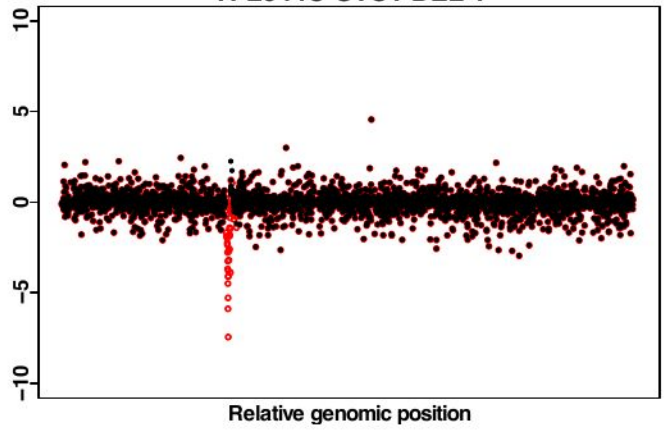

YFL044C OTU1 DEL 2

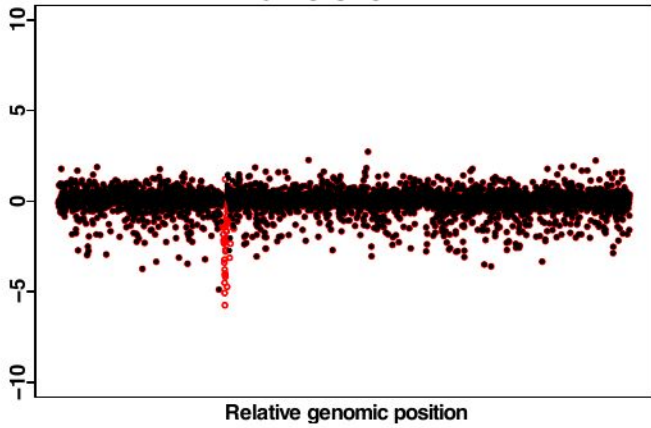

YFR010W UBP6 DEL 1

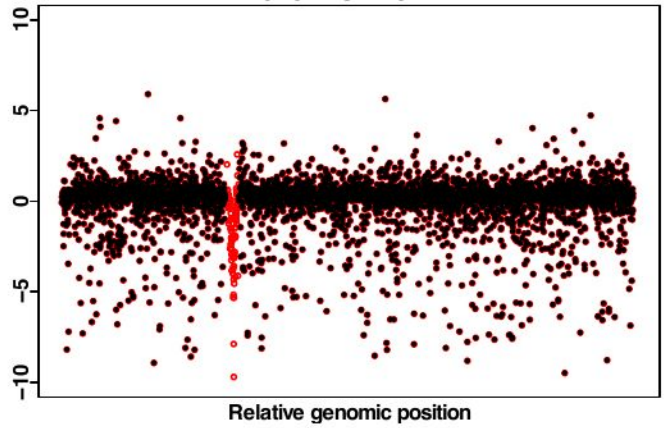

YFR010W UBP6 DEL 2

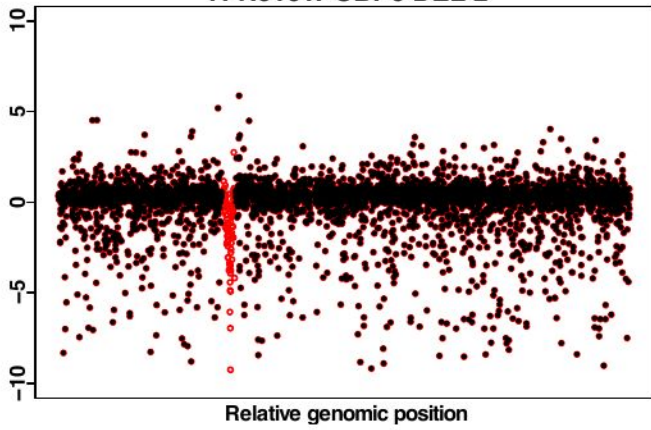

YGL004C RPN14 DEL 1

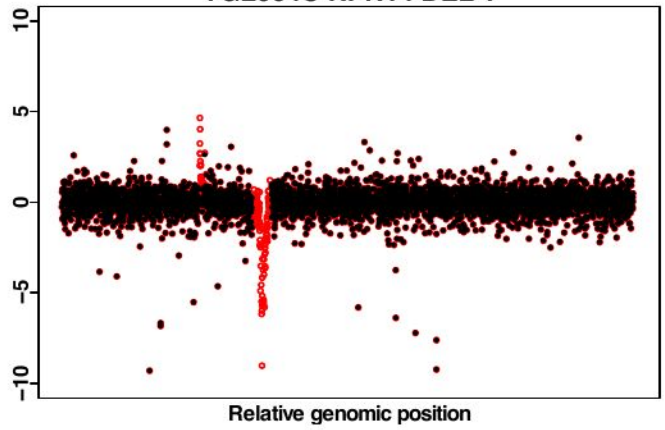

**YGL004C RPN14 DEL 2**

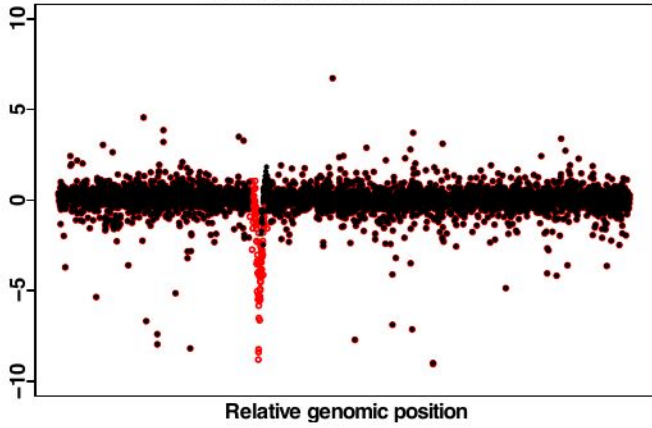

**YGL094C PAN2 DEL 1**

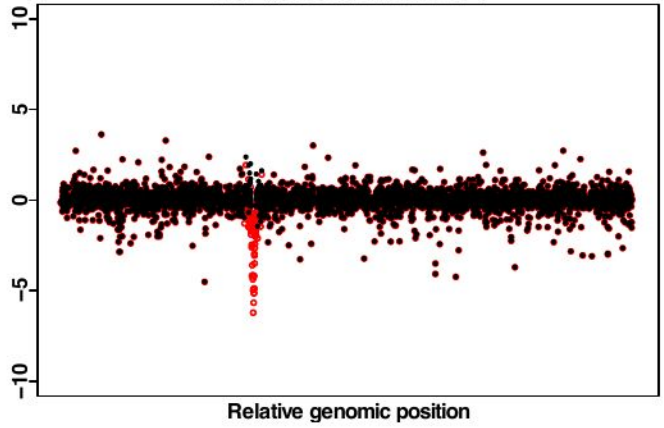

**YGL094C PAN2 DEL 2**

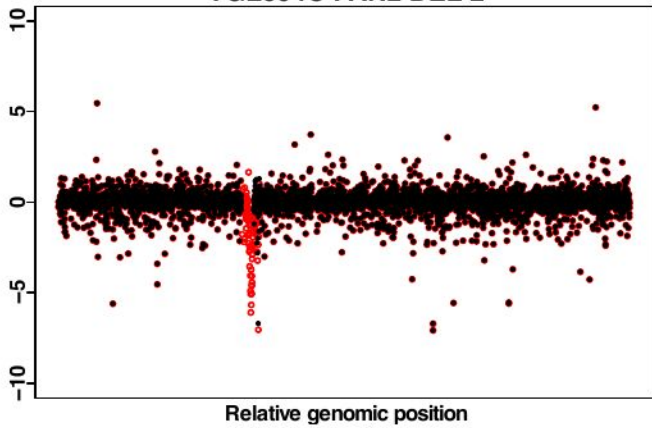

**YGL141W HUL5 DEL 1**

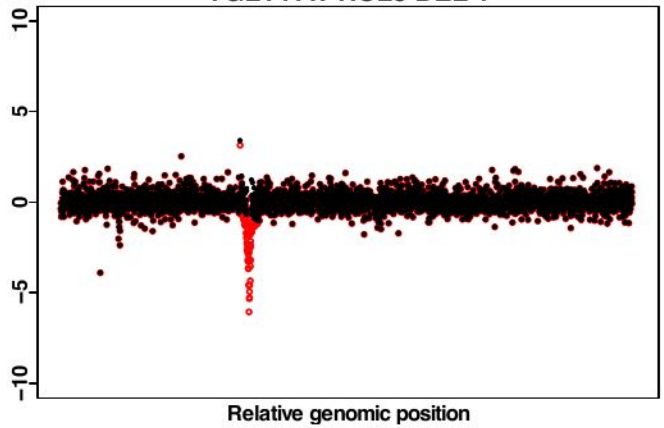

**YGL141W HUL5 DEL 2**

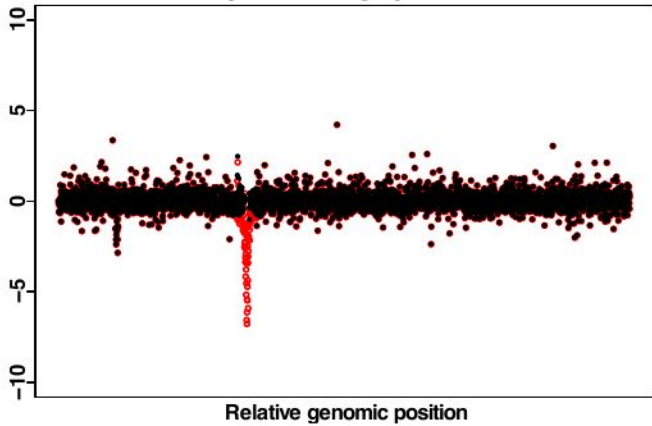

**YGL147C RPL9A DEL 1**

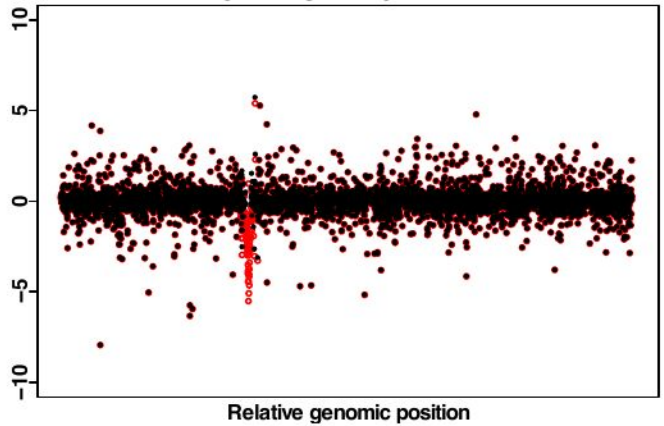

**YGL147C RPL9A DEL 2**

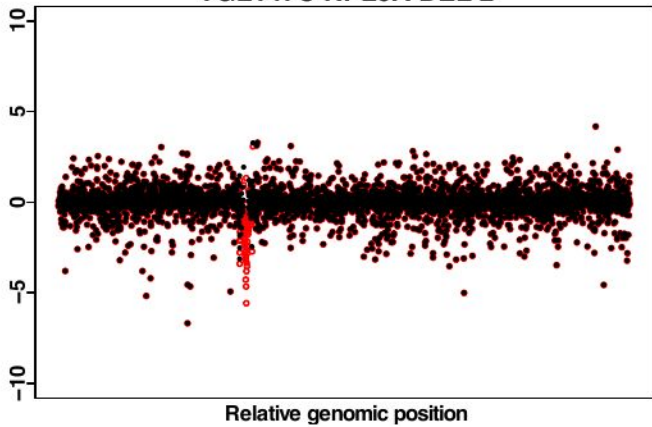

**YGL246C RAI1 DEL 1**

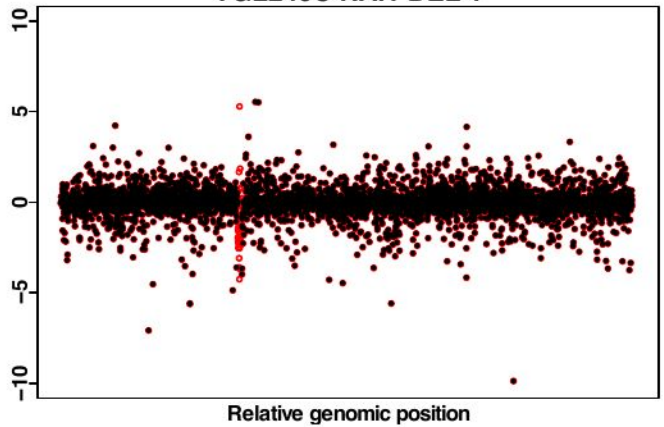



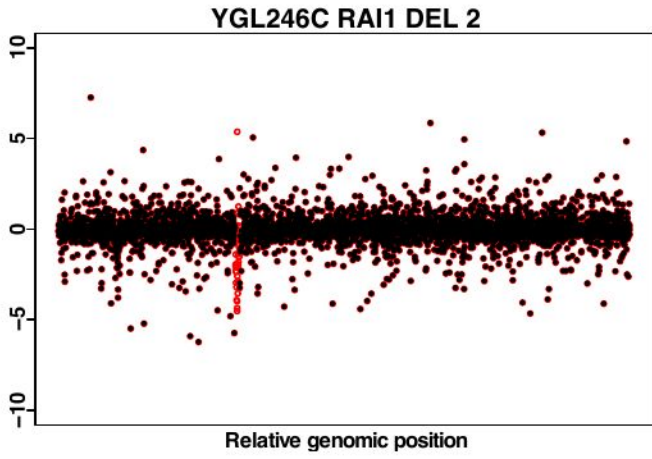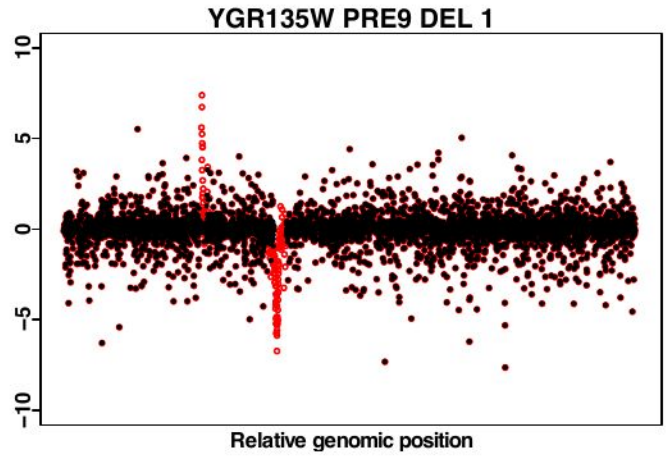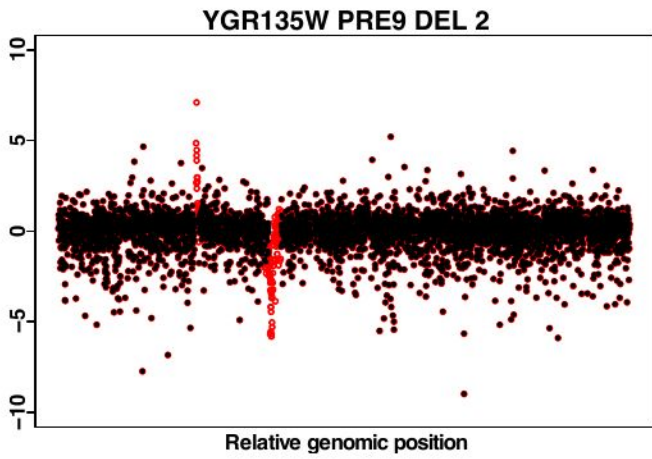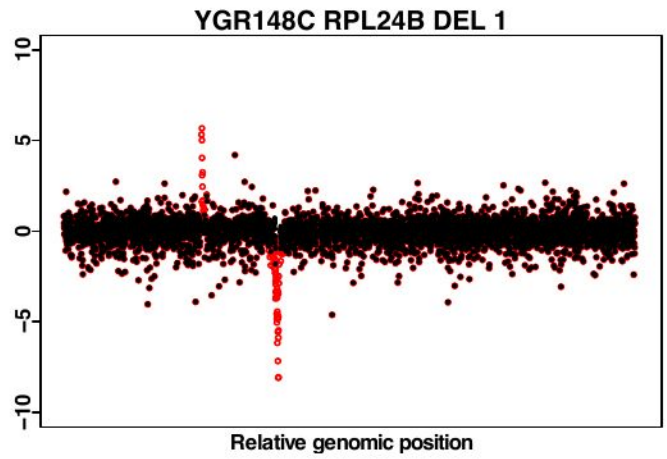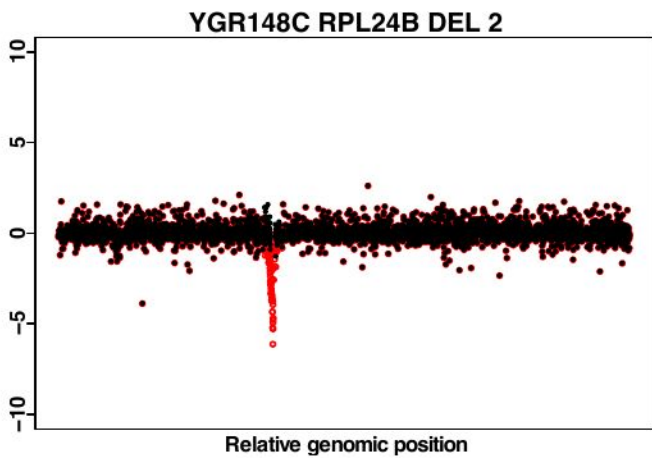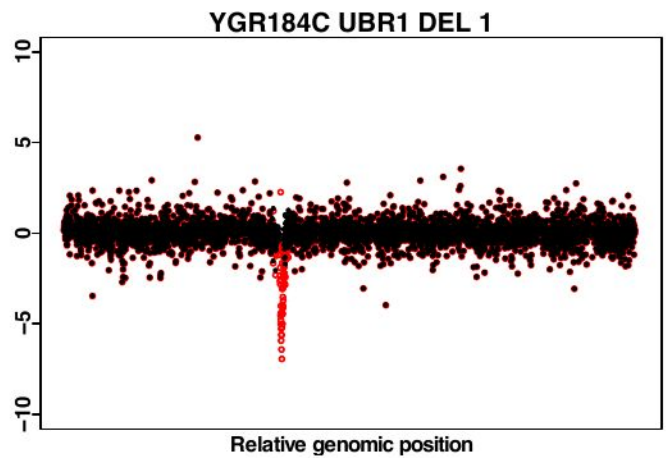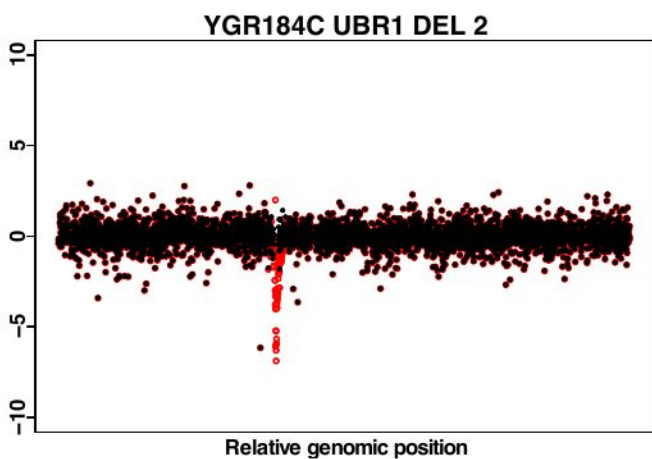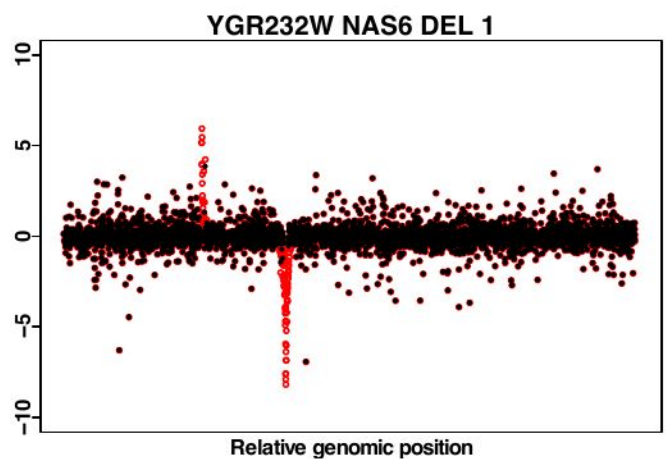

**YGR232W NAS6 DEL 2**

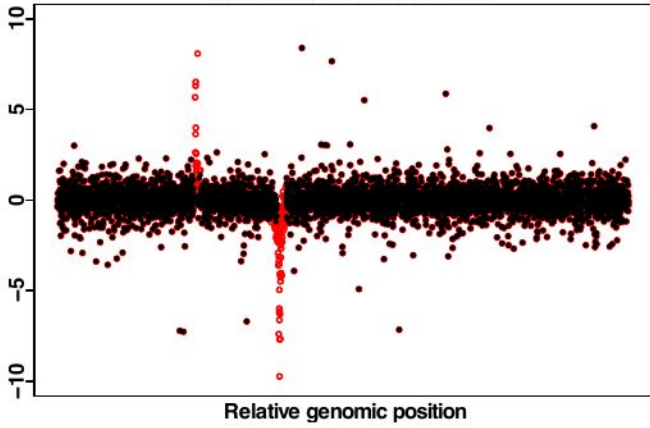

**YGR271W SLH1 DEL 1**

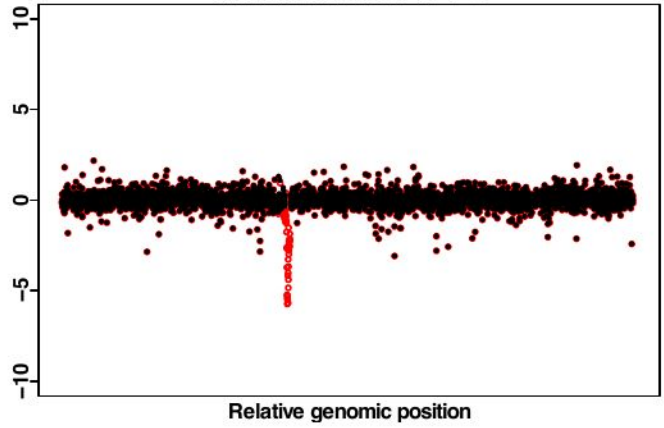

**YGR271W SLH1 DEL 2**

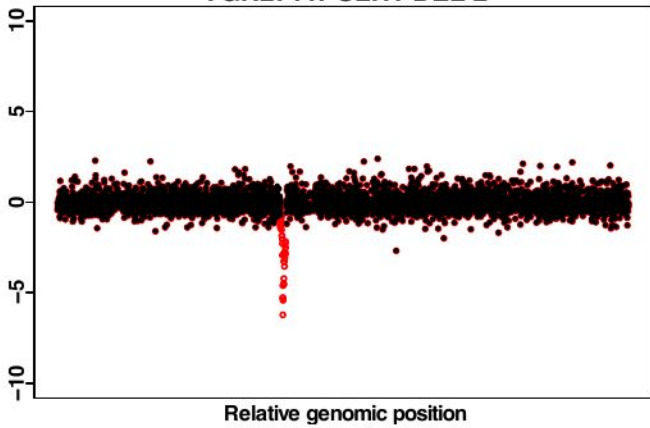

**YHL020C OPI1 DEL 1**

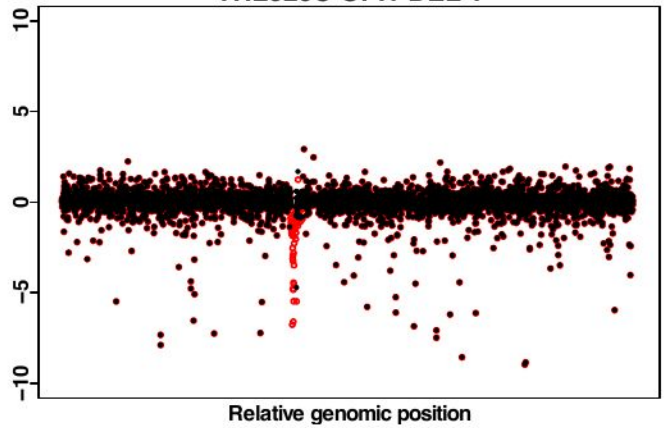

**YHL020C OPI1 DEL 2**

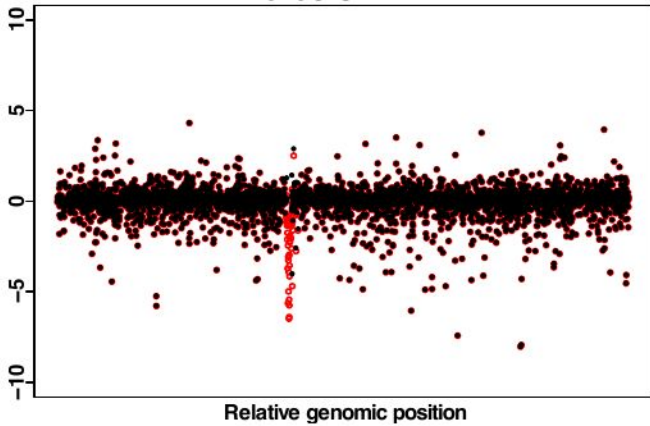

**YHL023C NPR3 DEL 1**

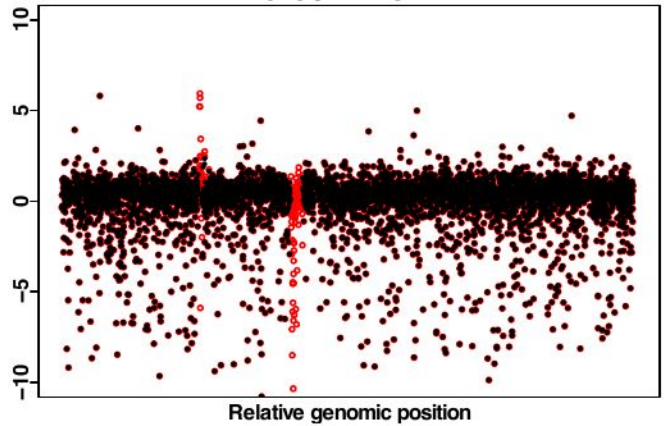

**YHL023C NPR3 DEL 2**

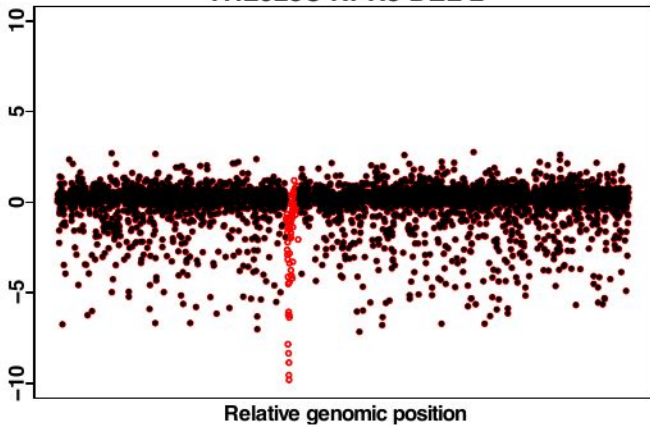

**YHL029C OCA5 DEL 1**

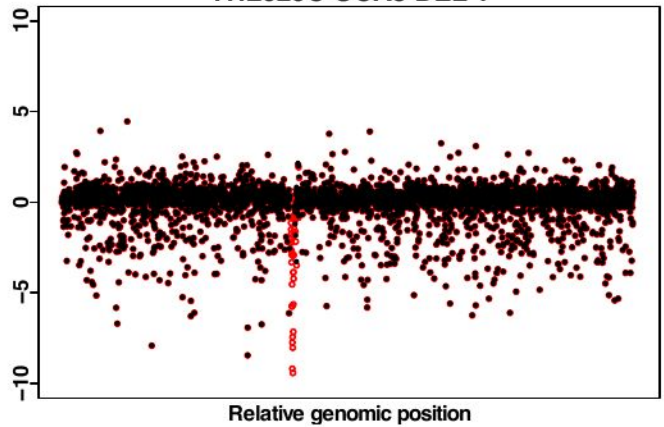



**YHL029C OCA5 DEL 2**

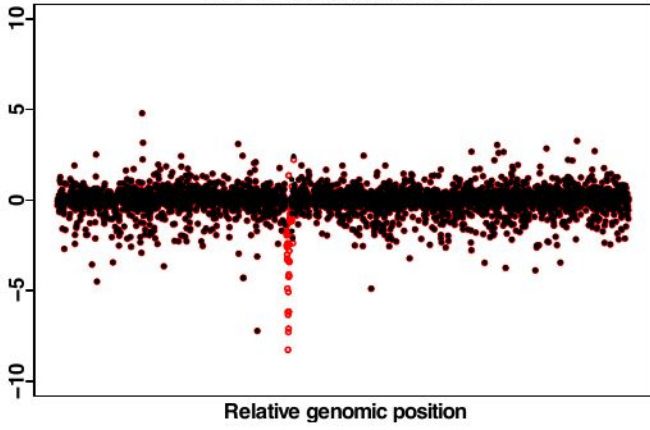

**YHR029C YHI9 DEL 1**

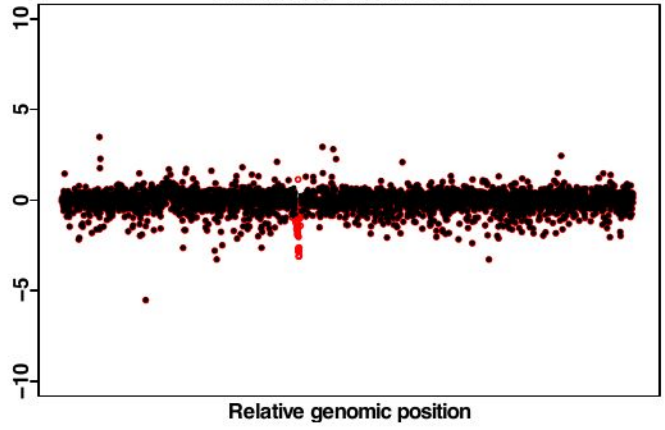

**YHR029C YHI9 DEL 2**

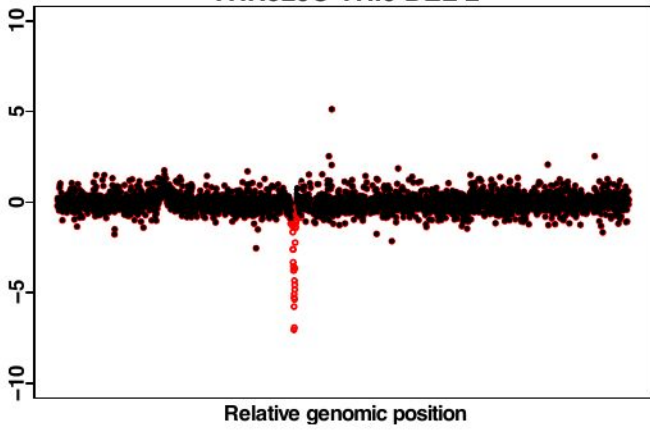

**YHR077C NMD2 DEL 1**

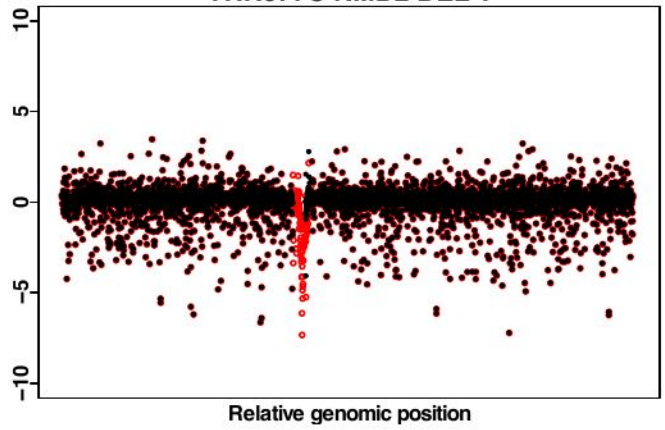

**YHR077C NMD2 DEL 2**

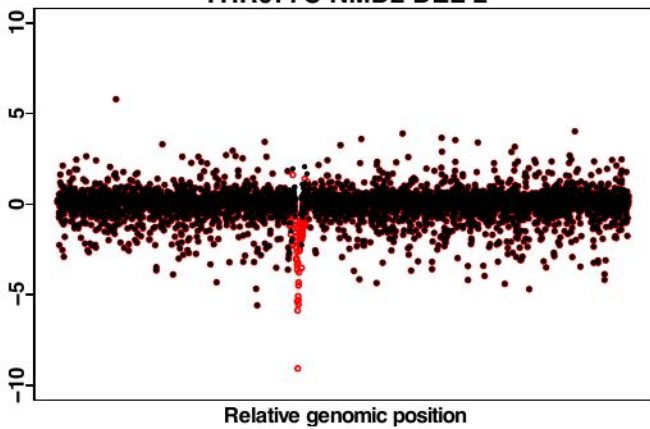

**YHR086W NAM8 DEL 1**

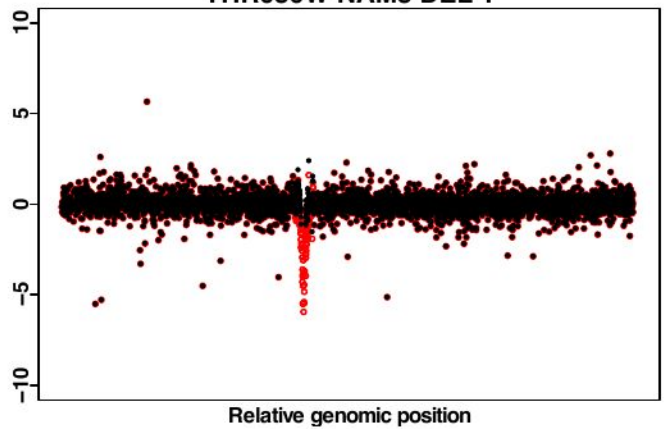

**YHR086W NAM8 DEL 2**

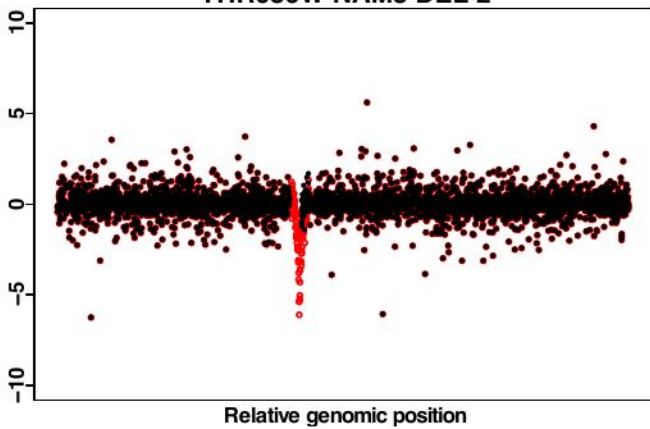

**YHR087W RTC3 DEL 1**

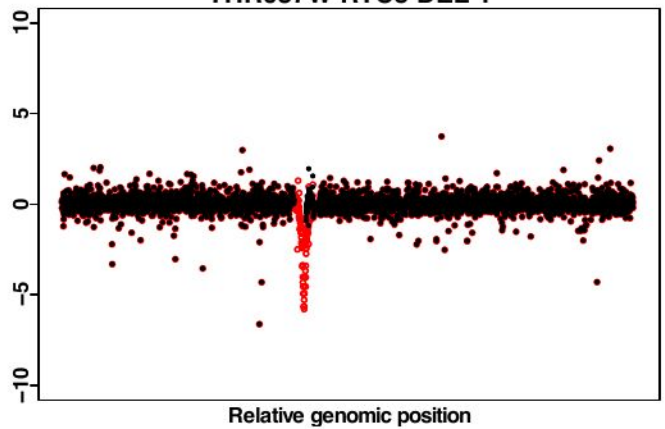

YHR087W RTC3 DEL 2

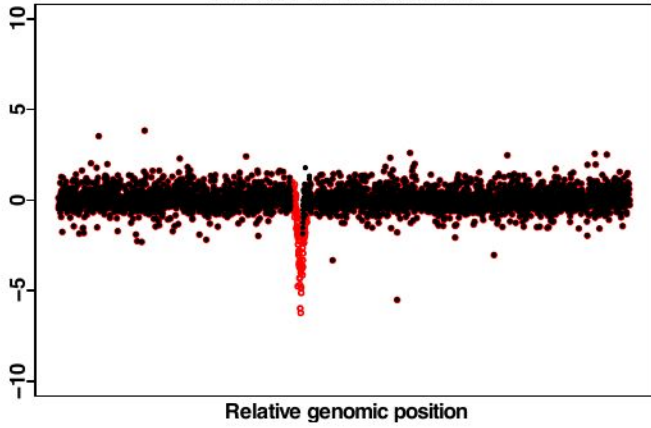

YHR115C DMA1 DEL 1

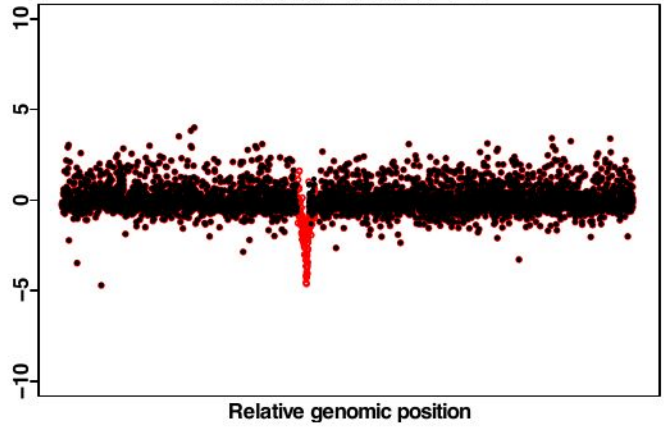

YHR115C DMA1 DEL 2

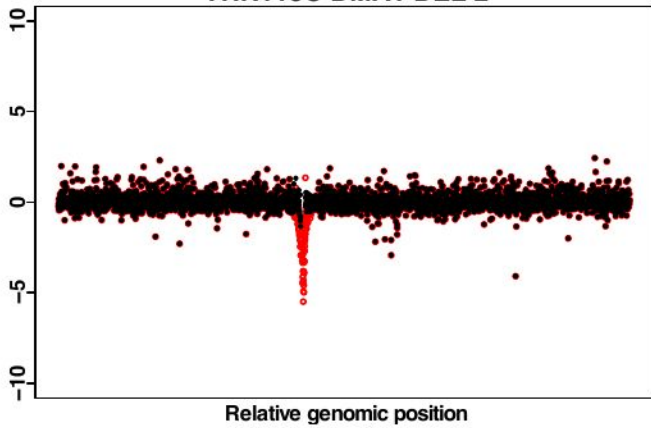

YHR121W LSM12 DEL 1

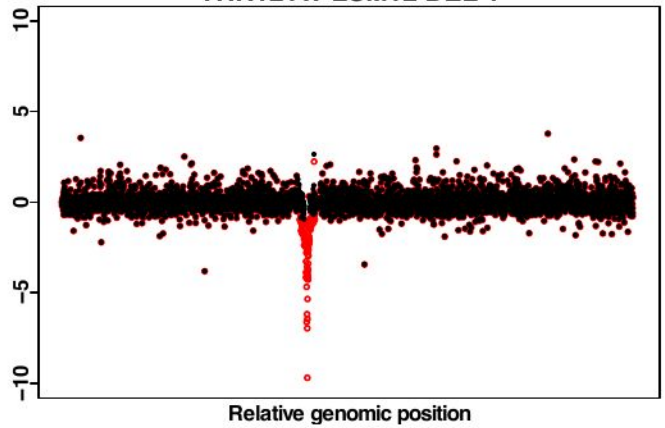

YHR121W LSM12 DEL 2

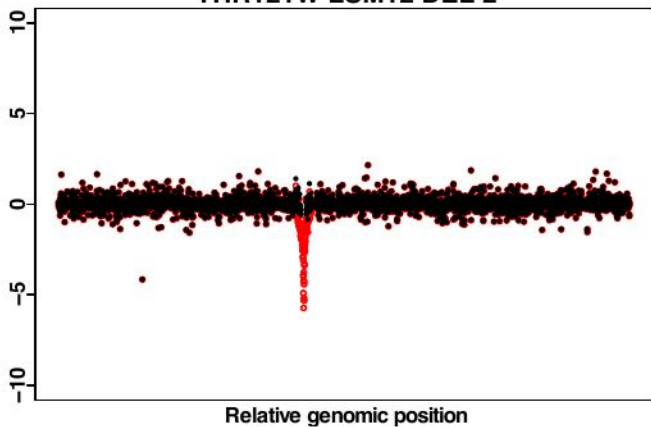

YHR200W RPN10 DEL 1

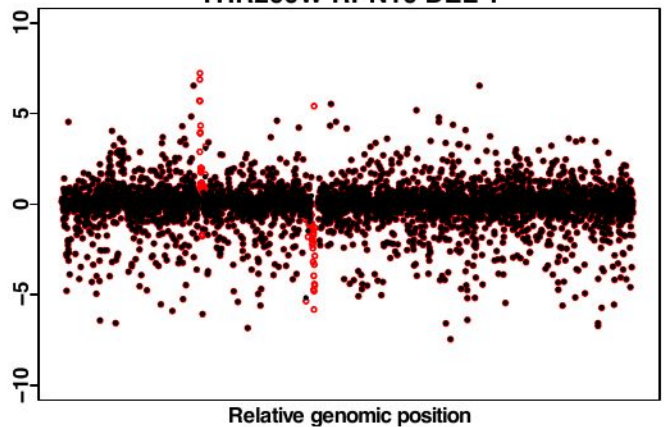

YHR200W RPN10 DEL 2

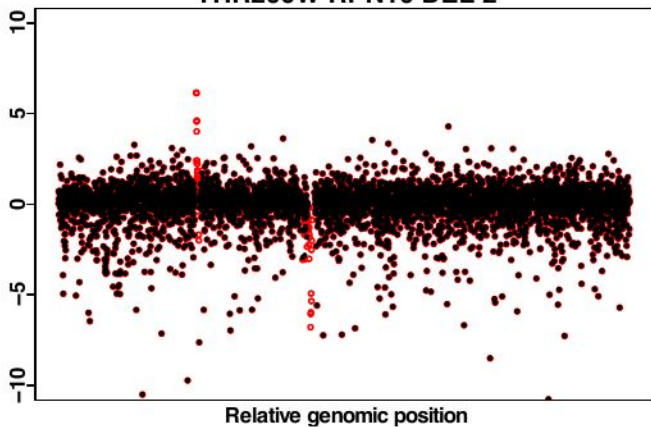

YIL005W EPS1 DEL 1

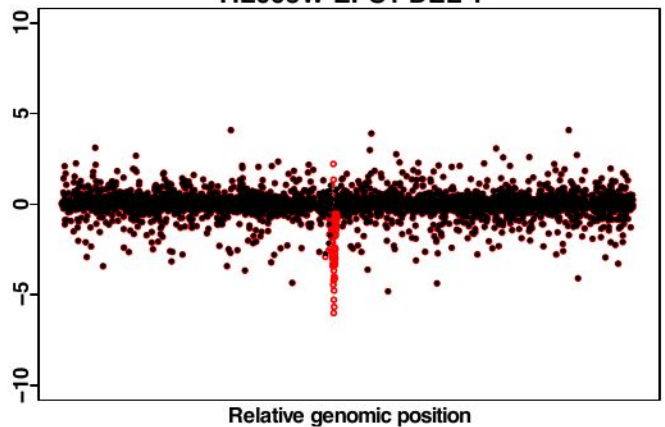

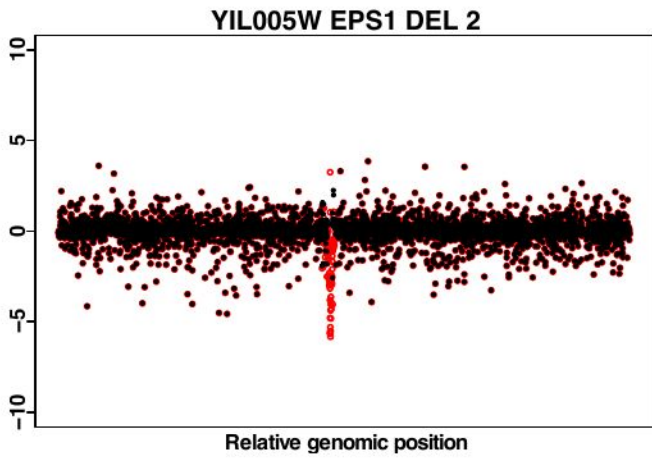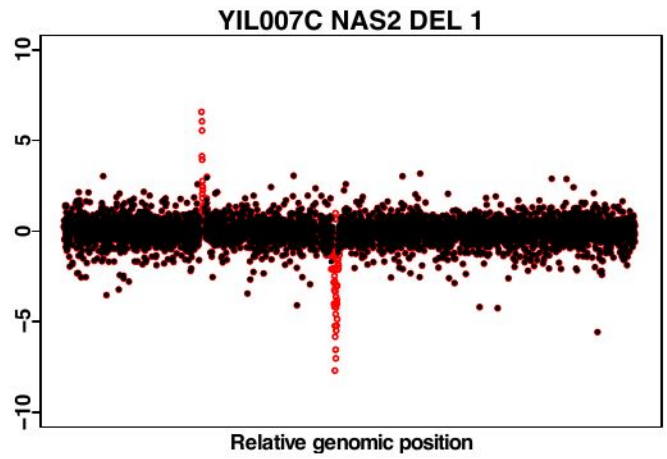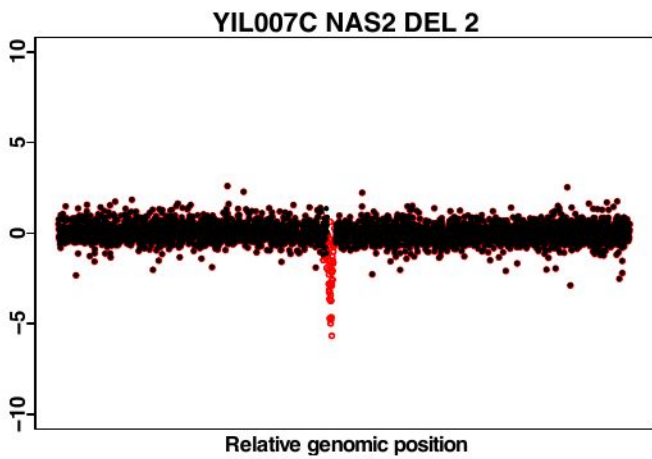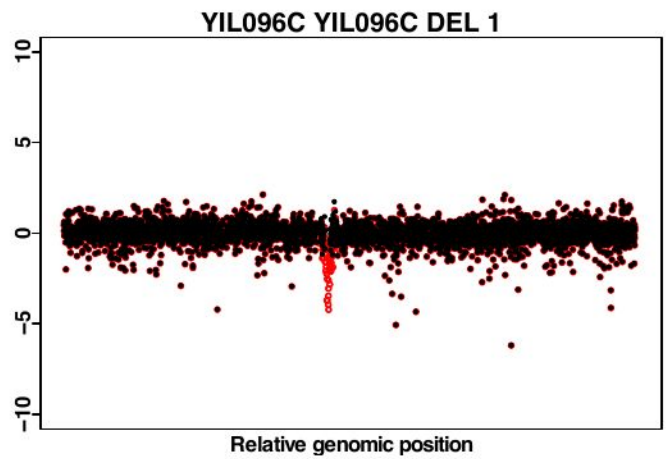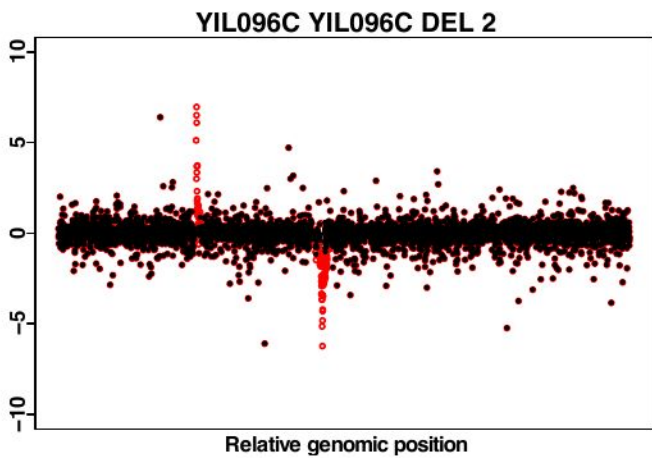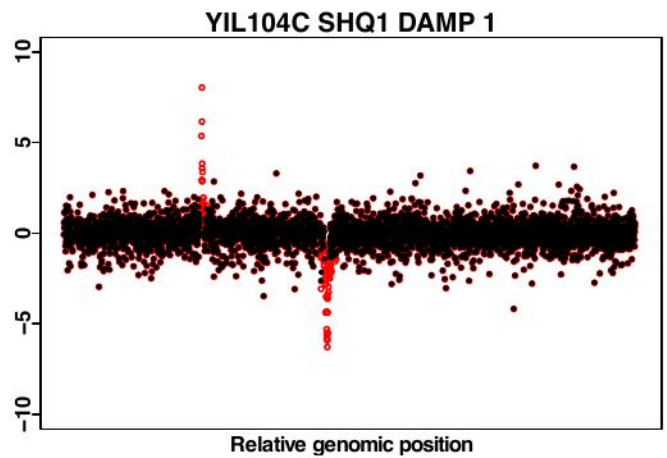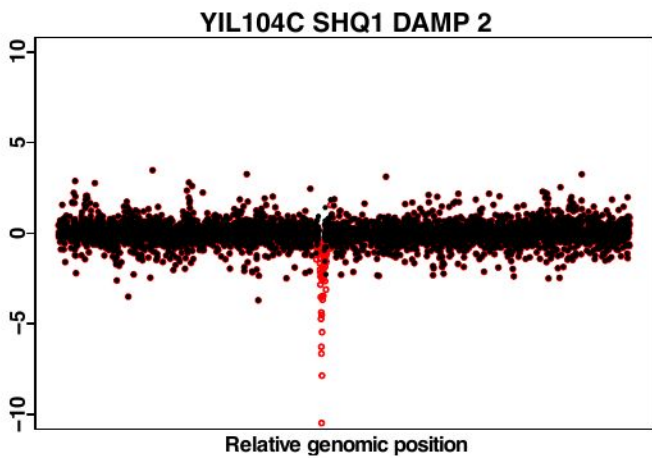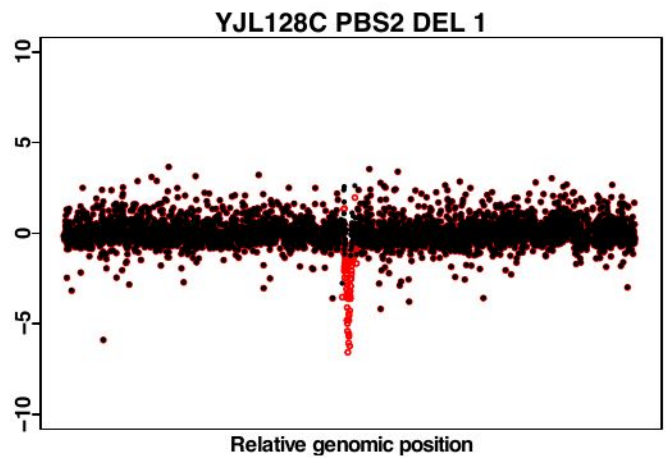



**YJL128C PBS2 DEL 2**

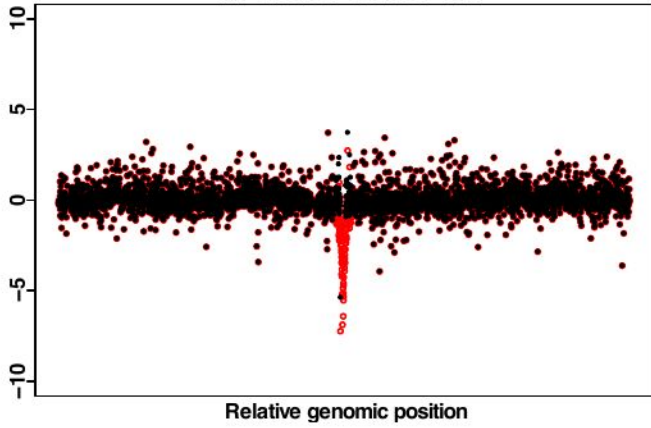

**YJL141C YAK1 DEL 1**

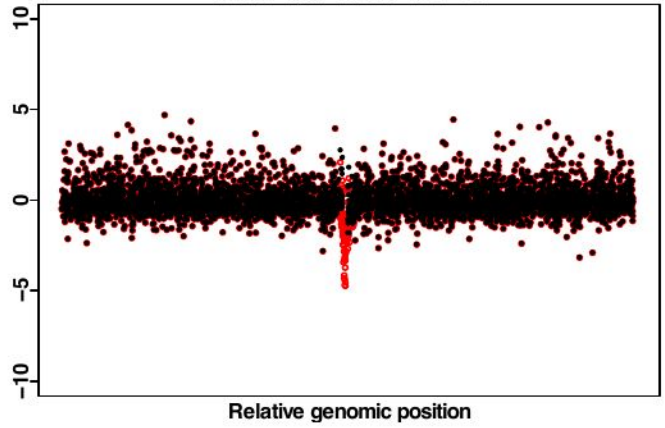

**YJL141C YAK1 DEL 2**

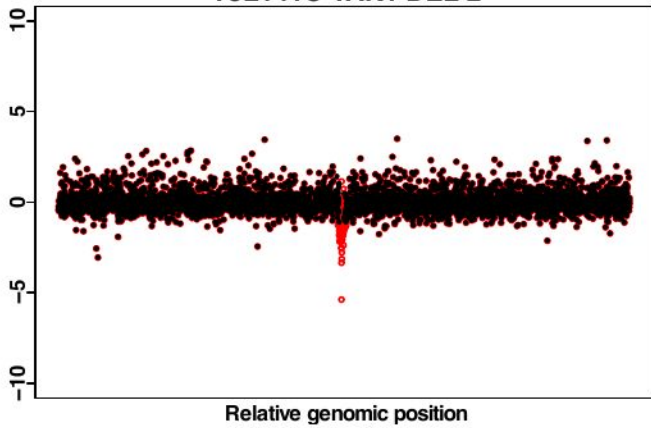

**YJL191W RPS14B DEL 1**

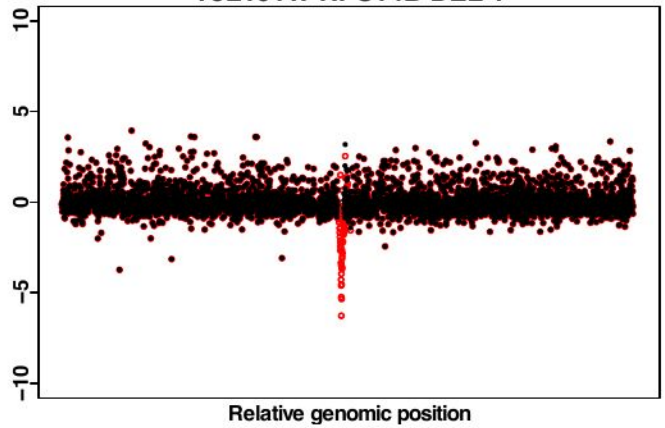

**YJL191W RPS14B DEL 2**

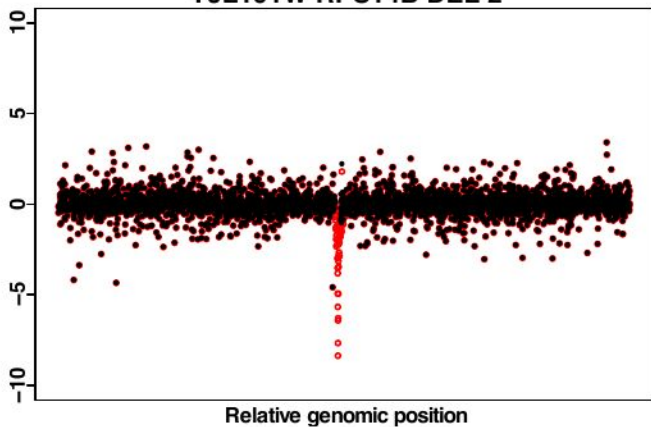

**YJL208C NUC1 DEL 1**

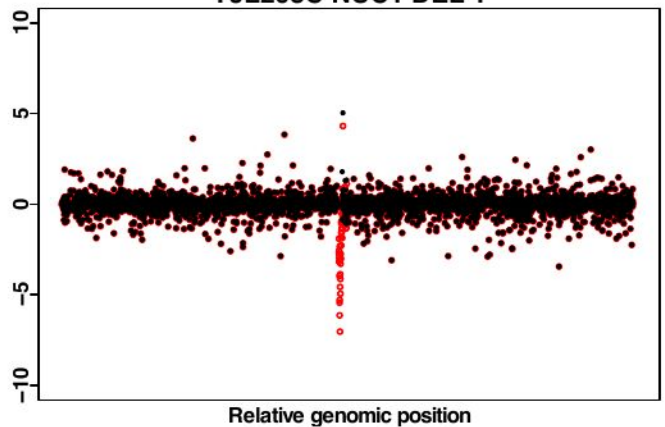

**YJL208C NUC1 DEL 2**

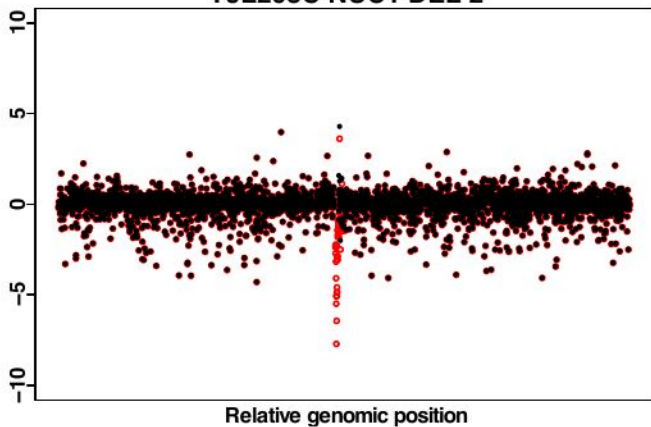

**YJR070C LIA1 DEL 1**

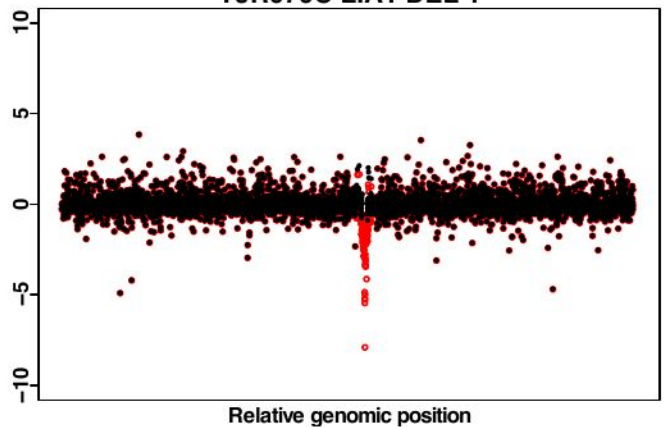

YJR070C LIA1 DEL 2

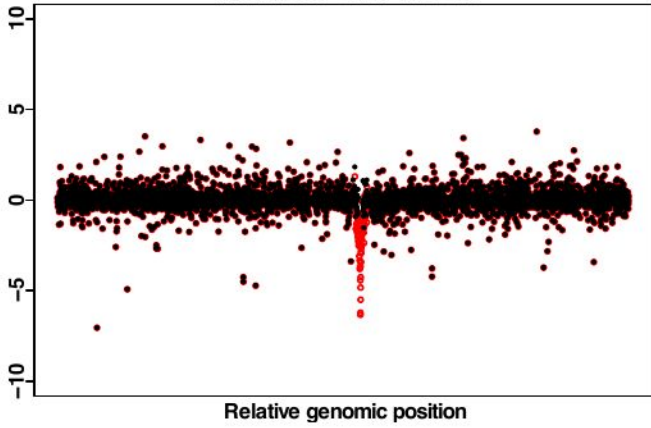

YJR084W YJR084W DEL 1

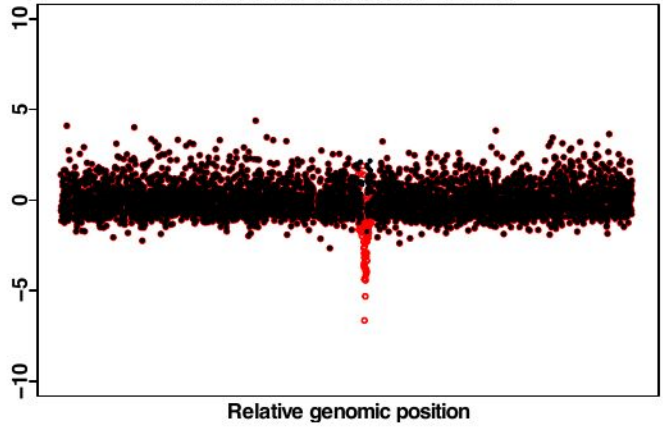

YJR084W YJR084W DEL 2

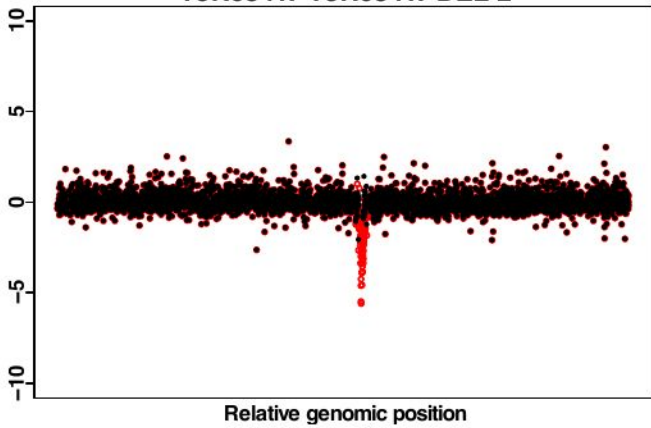

YKL007W CAP1 DEL 1

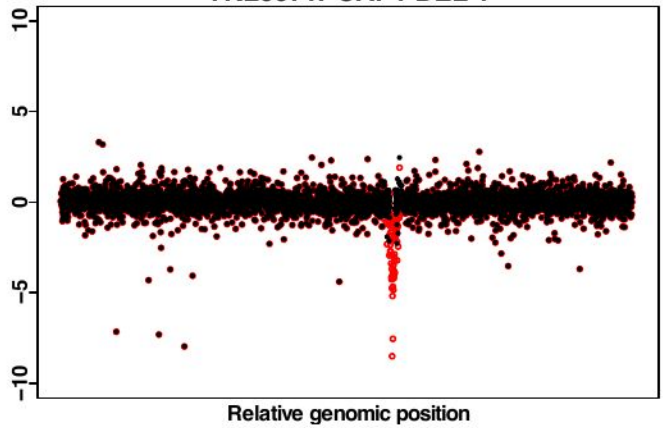

YKL007W CAP1 DEL 2

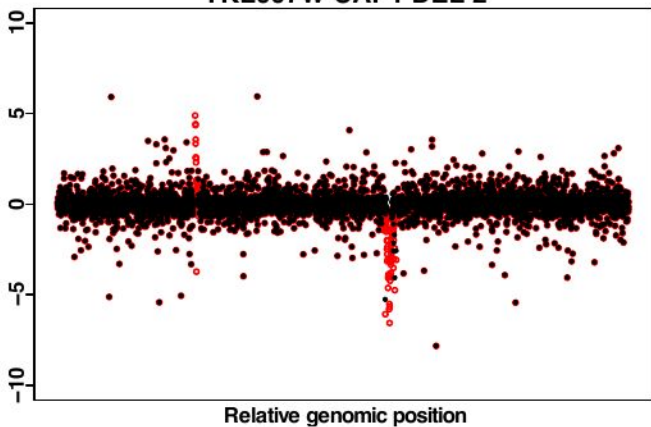

YKL023W YKL023W DEL 1

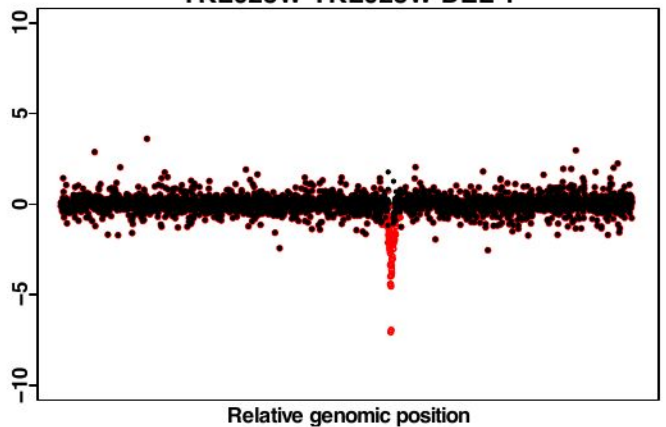

YKL023W YKL023W DEL 2

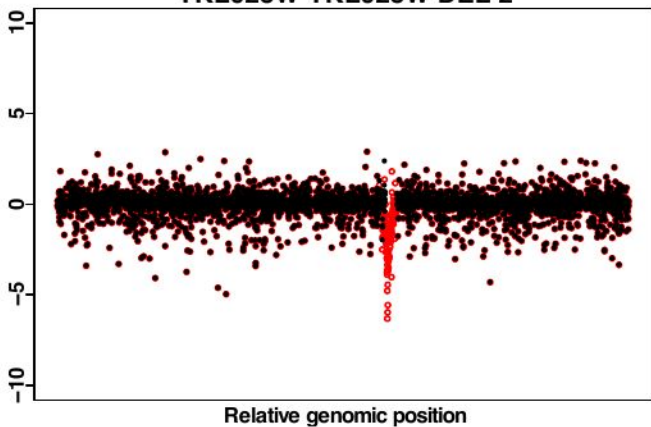

YKL025C PAN3 DEL 1

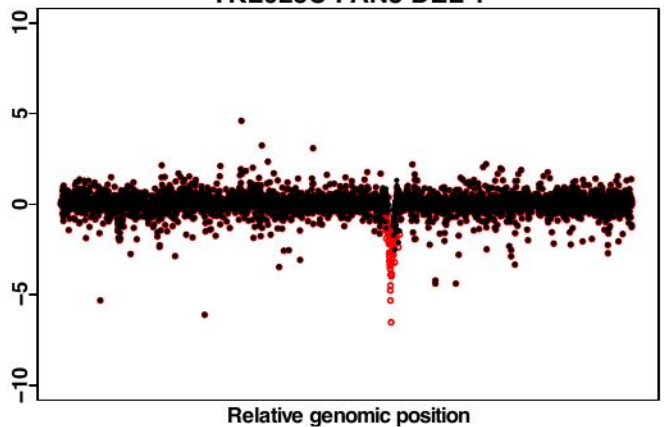

YKL025C PAN3 DEL 2

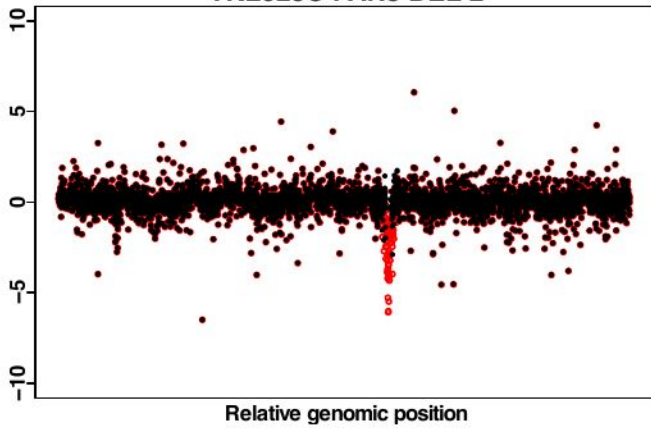

YKL081W TEF4 DEL 1

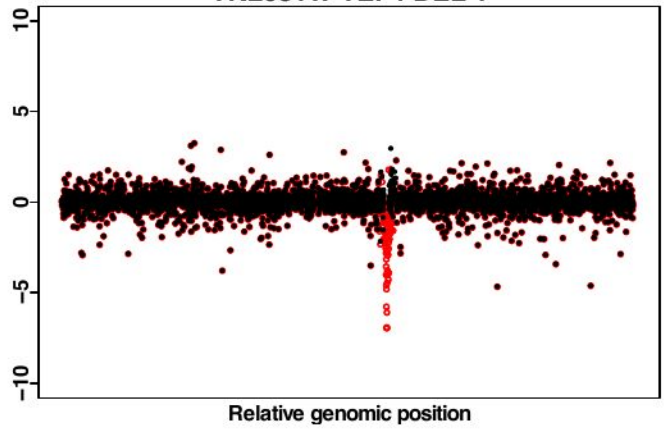

YKL081W TEF4 DEL 2

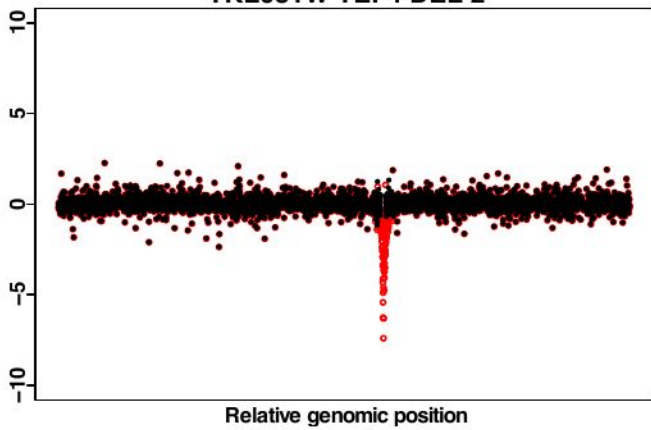

YKL206C ADD66 DEL 1

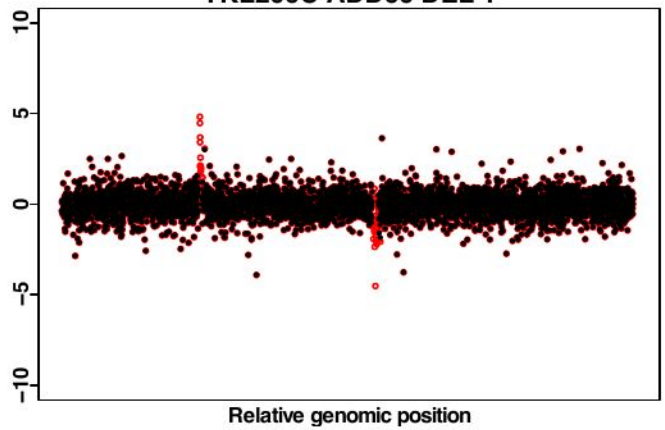

YKL206C ADD66 DEL 2

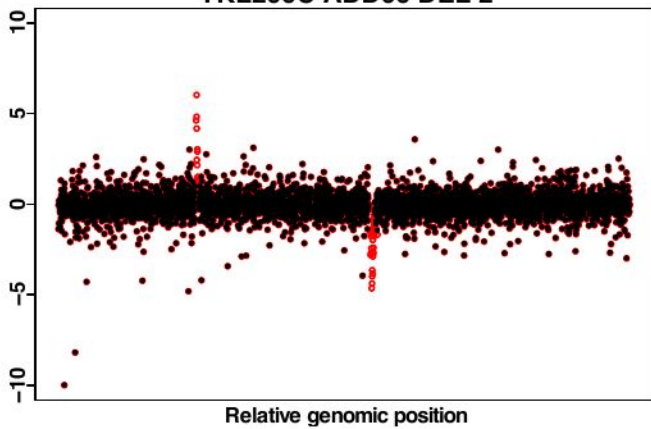

YKR019C IRS4 DEL 1

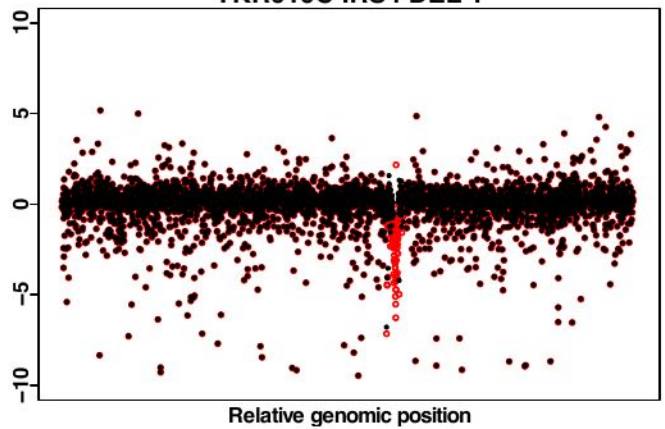

YKR019C IRS4 DEL 2

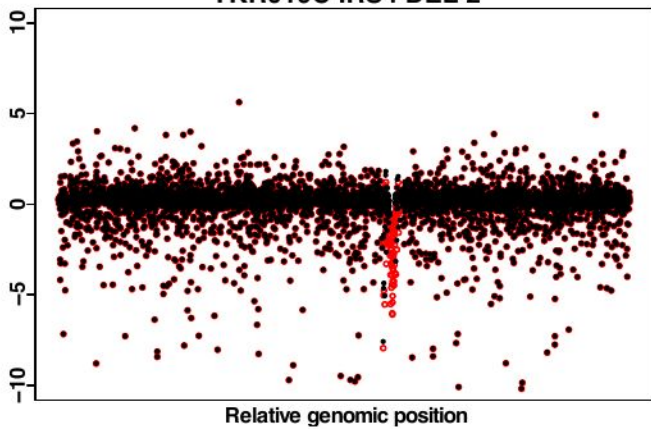

YKR048C NAP1 DEL 1

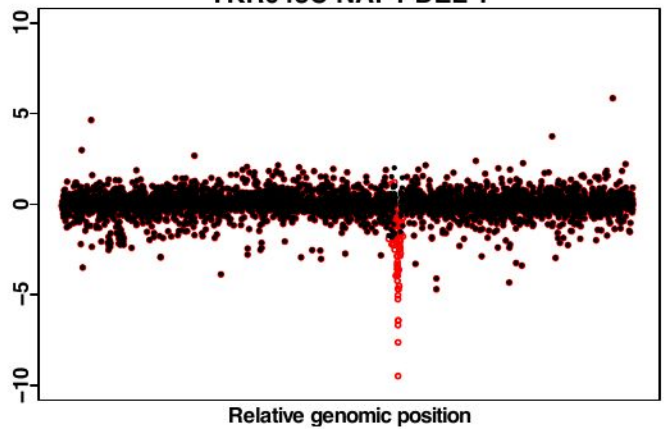



YKR048C NAP1 DEL 2

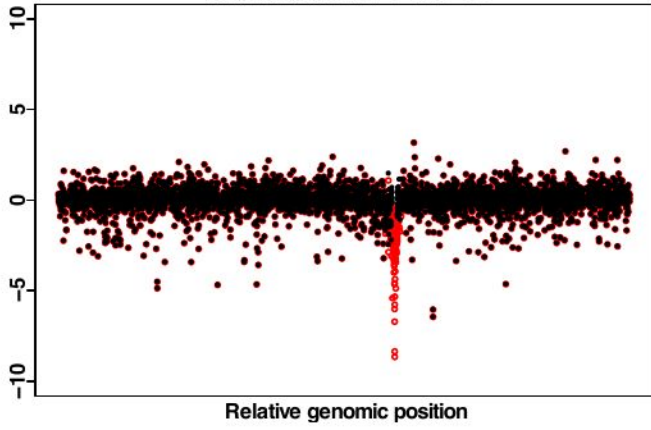

YKR084C HBS1 DEL 1

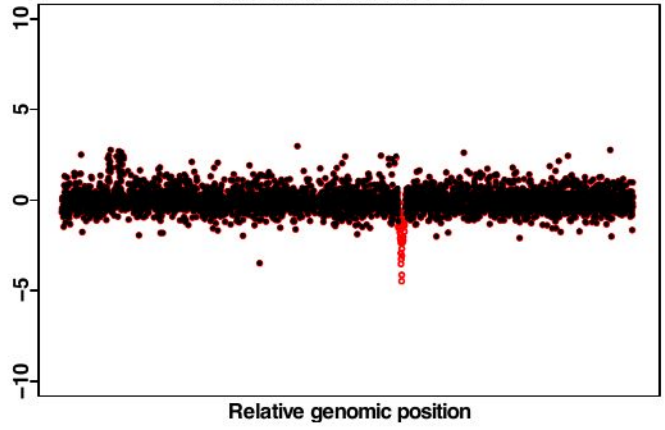

YKR084C HBS1 DEL 2

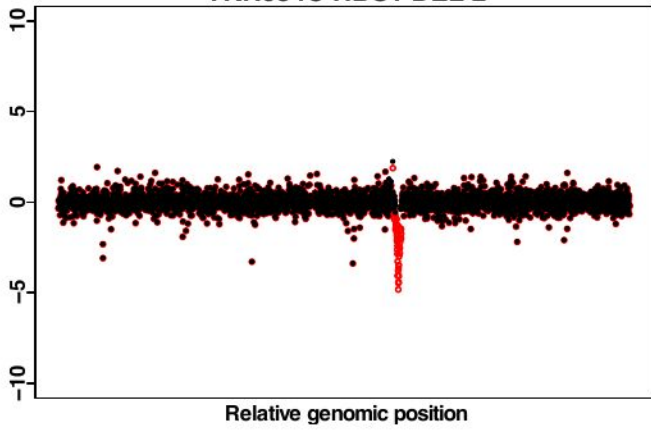

YLR021W IRC25 DEL 1

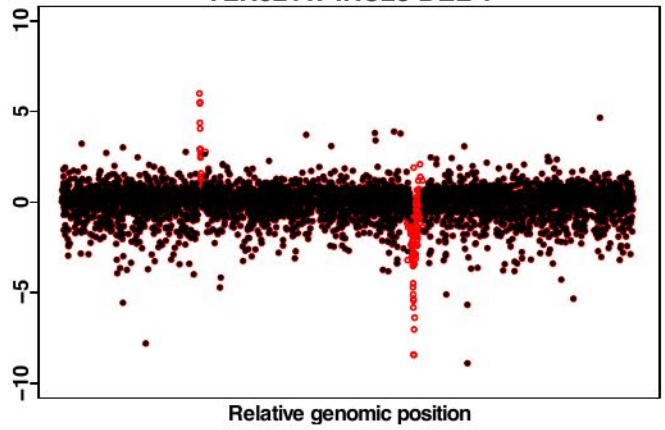

YLR021W IRC25 DEL 2

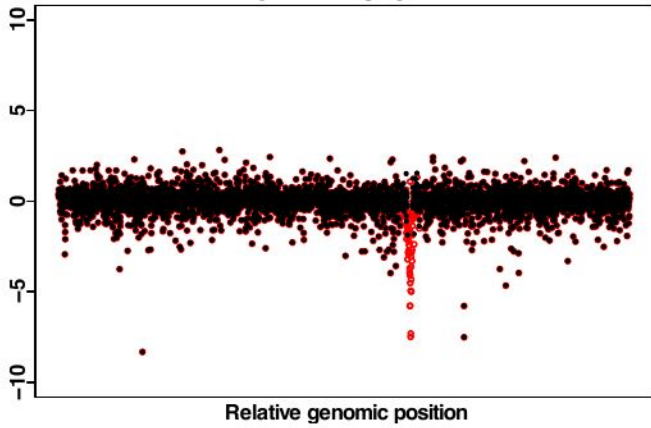

YLR058C SHM2 DEL 1

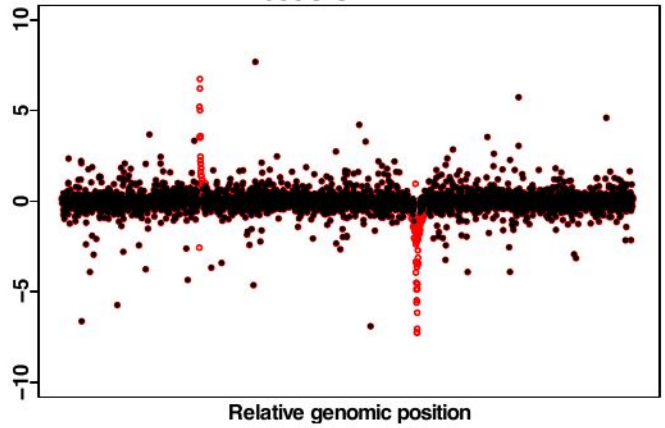

YLR058C SHM2 DEL 2

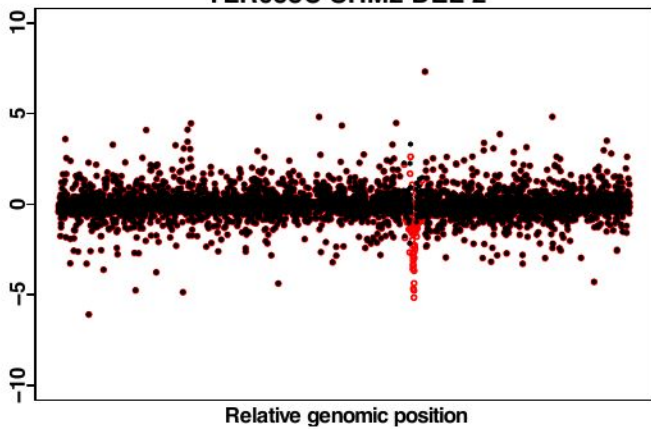

YLR059C REX2 DEL 1

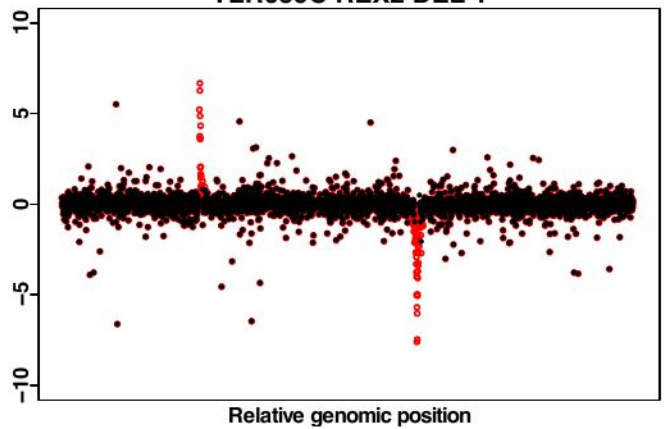

YLR059C REX2 DEL 2

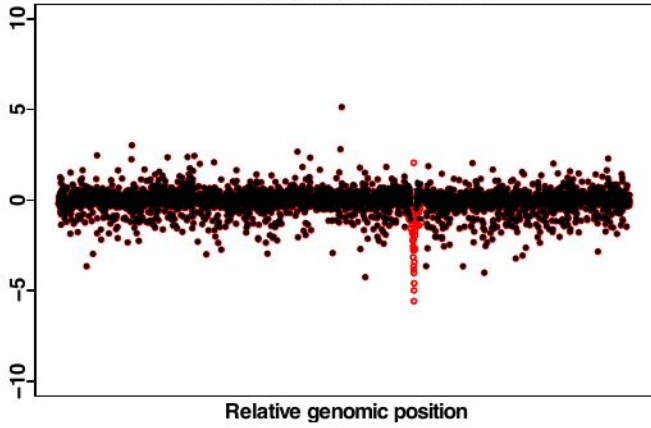

YLR107W REX3 DEL 1

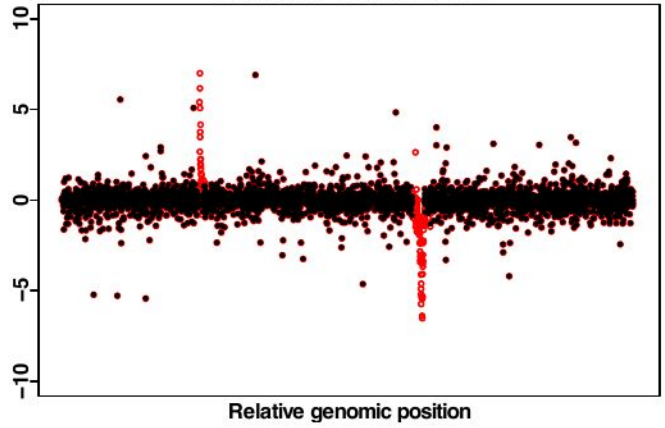

YLR107W REX3 DEL 2

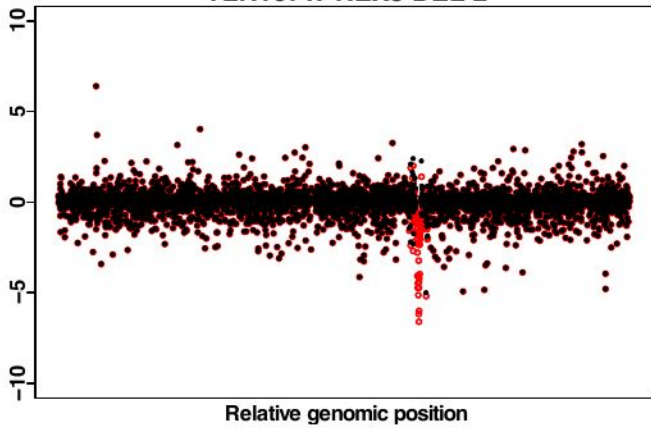

YLR175W CBF5 DAMP 1

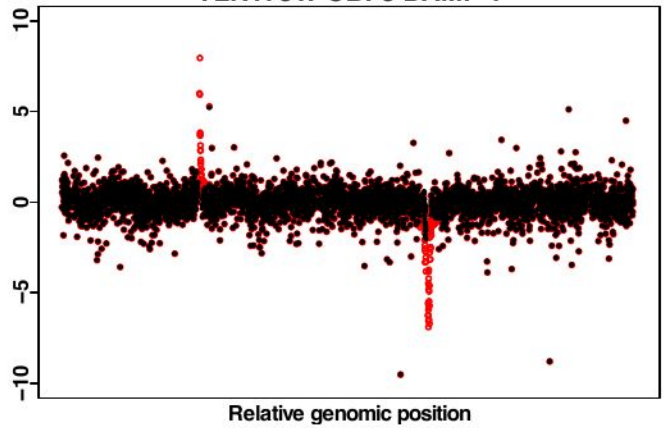

YLR175W CBF5 DAMP 2

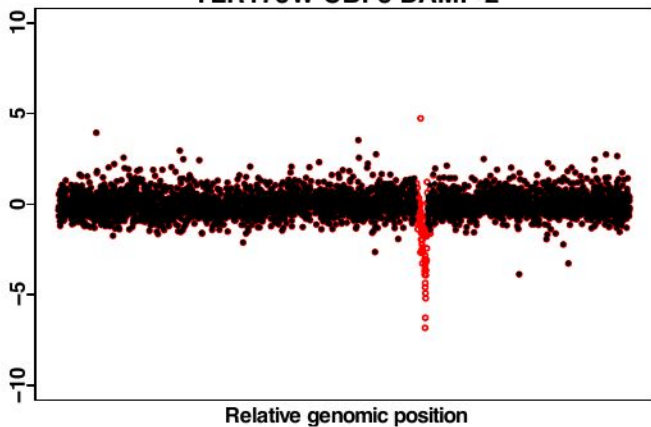

YLR175W CBF5 DAMP 3

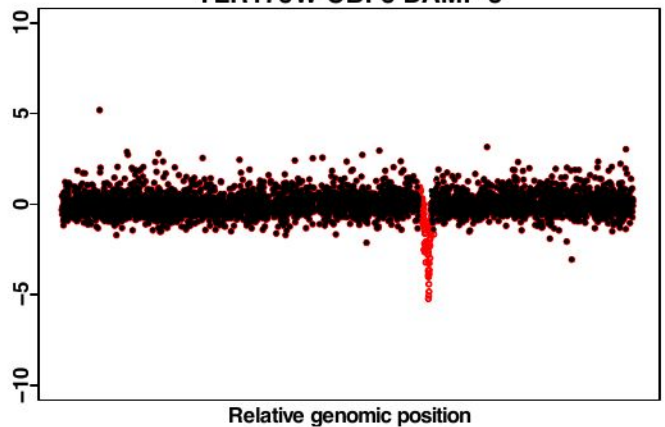

YLR177W YLR177W DEL 1

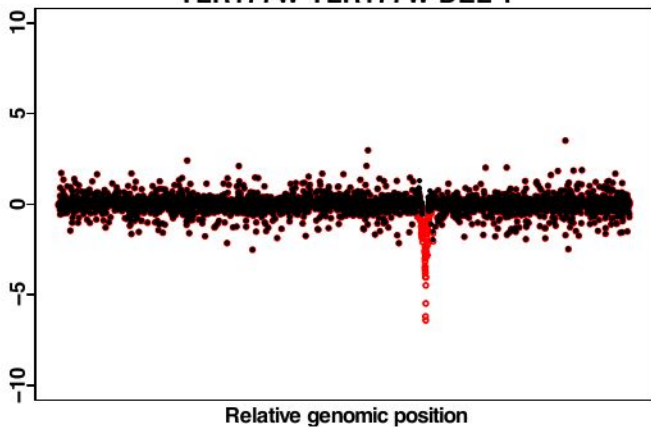

YLR177W YLR177W DEL 2

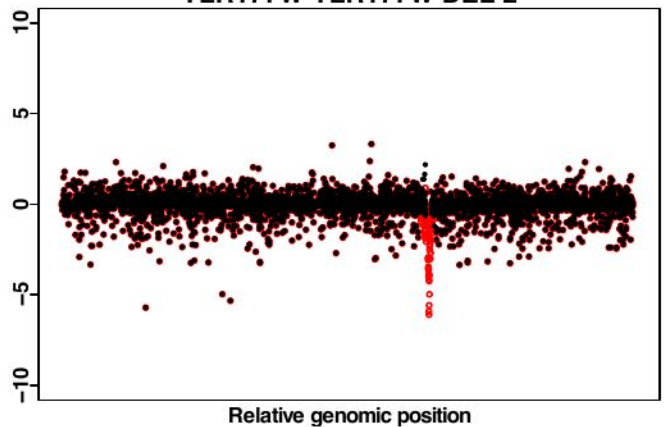

YLR185W RPL37A DEL 1

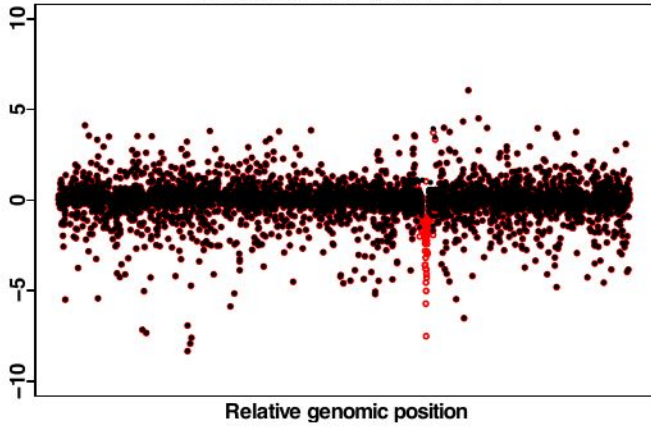

YLR185W RPL37A DEL 2

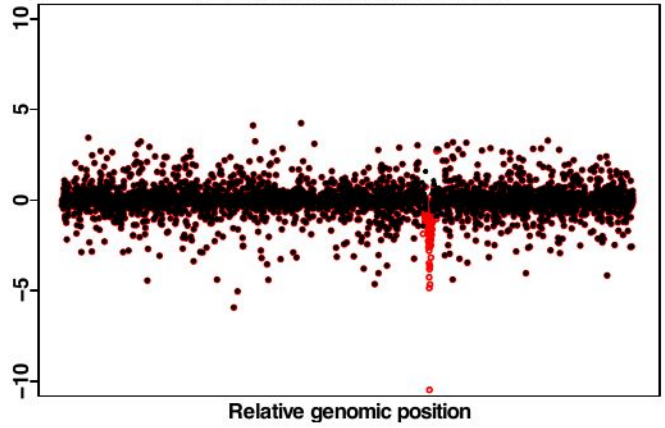

YLR192C HCR1 DEL 1

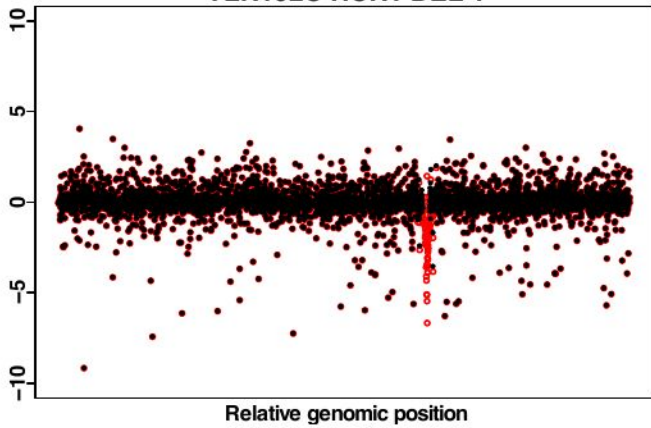

YLR192C HCR1 DEL 2

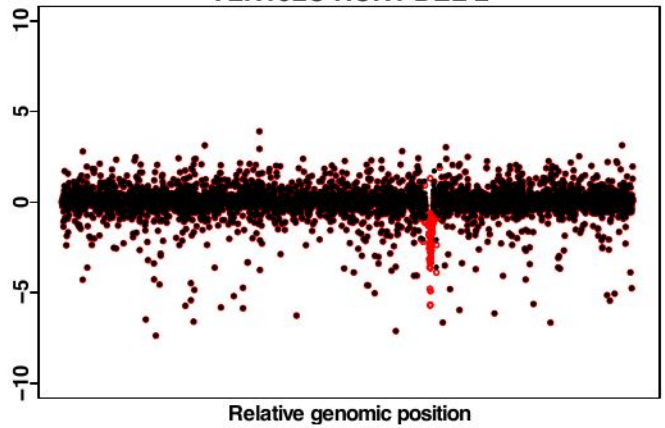

YLR197W NOP56 DAMP 1

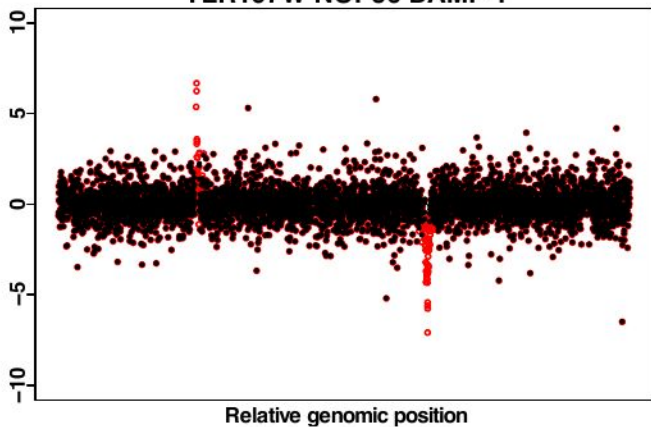

YLR197W NOP56 DAMP 2

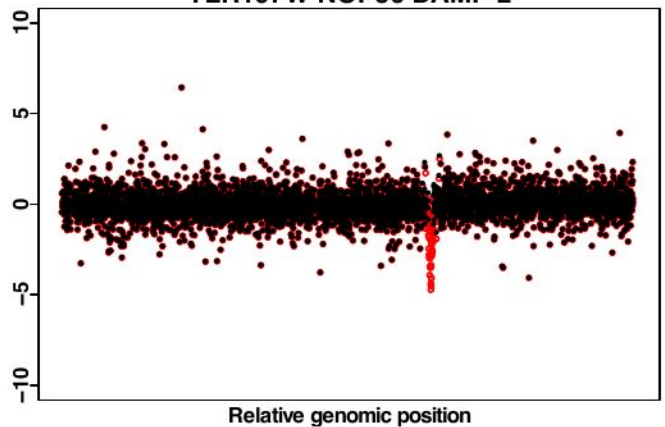

YLR264W RPS28B DEL 1

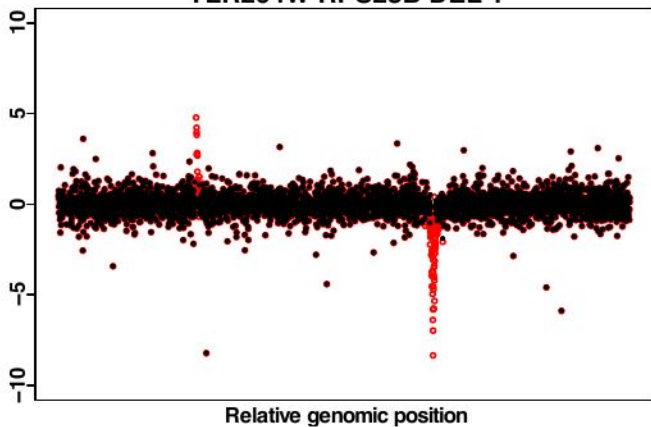

YLR264W RPS28B DEL 2

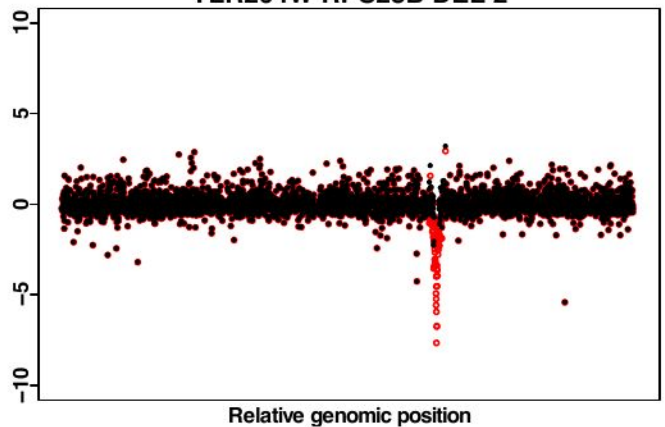



YLR342W FKS1 DEL 1

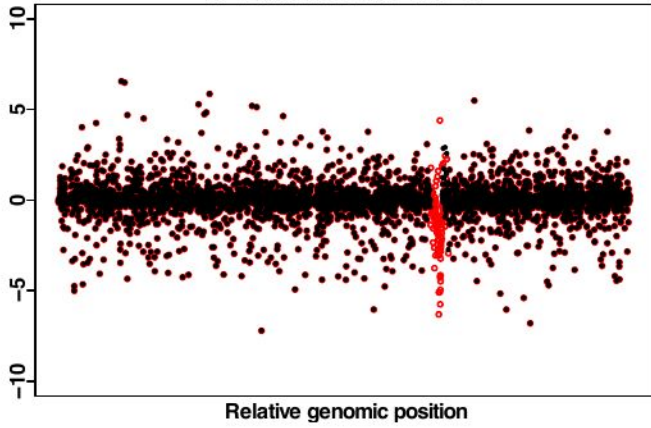

YLR342W FKS1 DEL 2

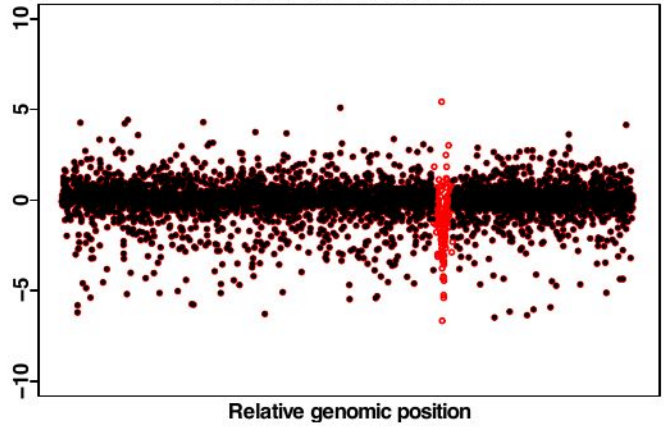

YLR363C NMD4 DEL 1

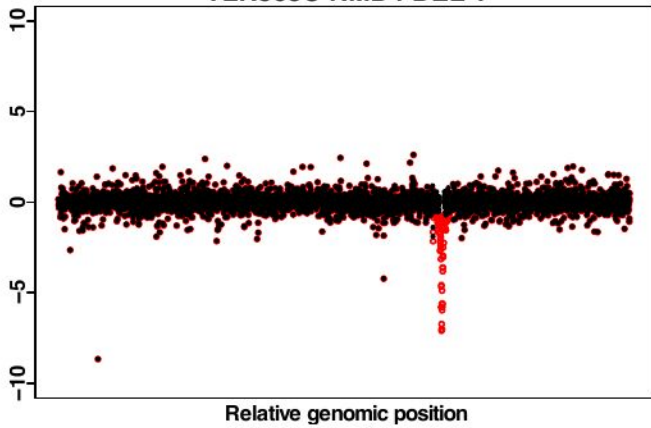

YLR363C NMD4 DEL 2

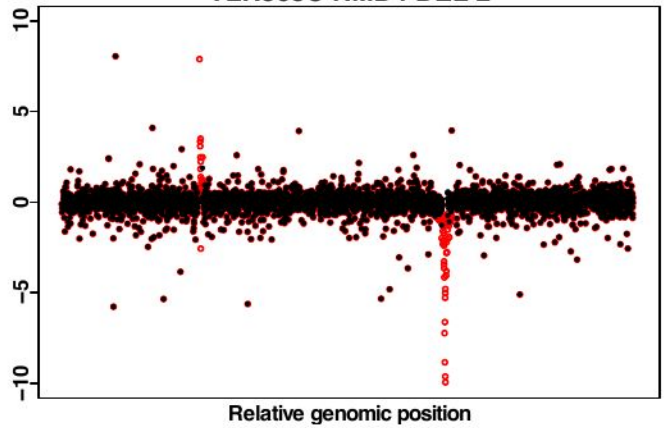

YLR363C NMD4 DEL 3

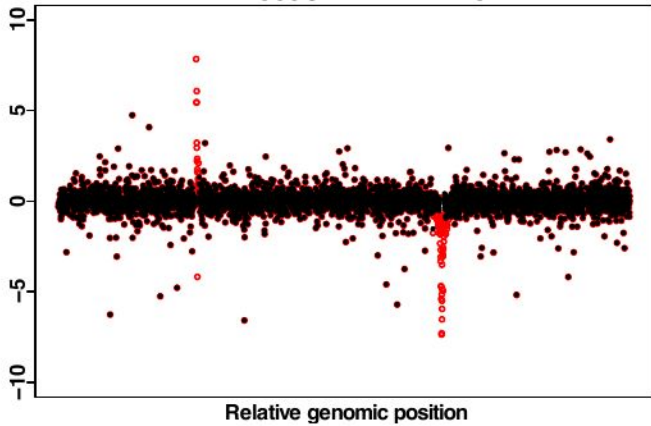

YLR449W FPR4 DEL 1

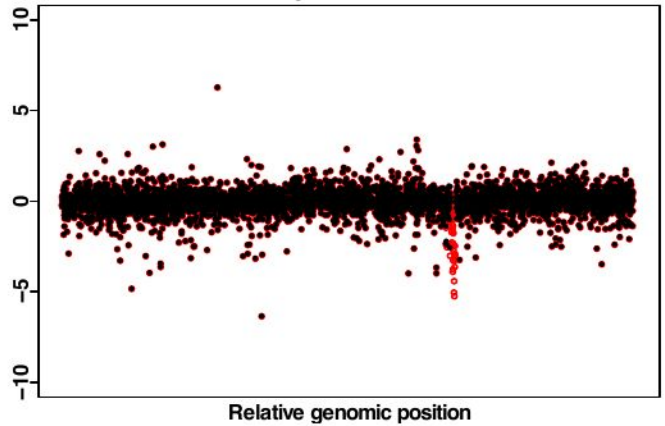

YLR449W FPR4 DEL 2

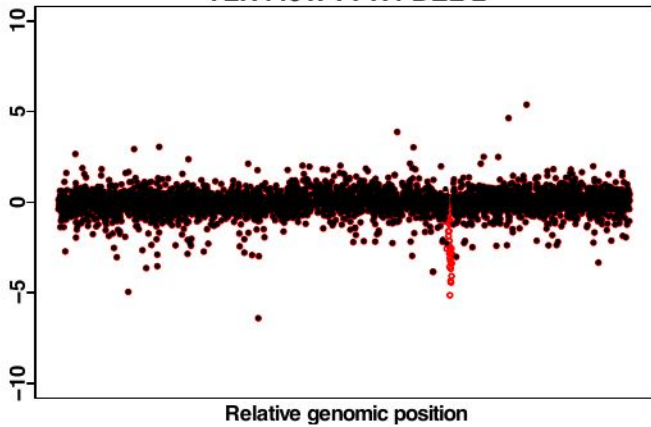

YML014W TRM9 DEL 1

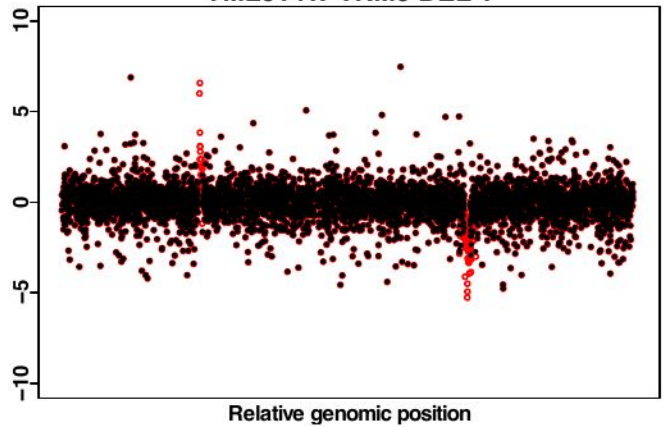

**YML014W TRM9 DEL 2**

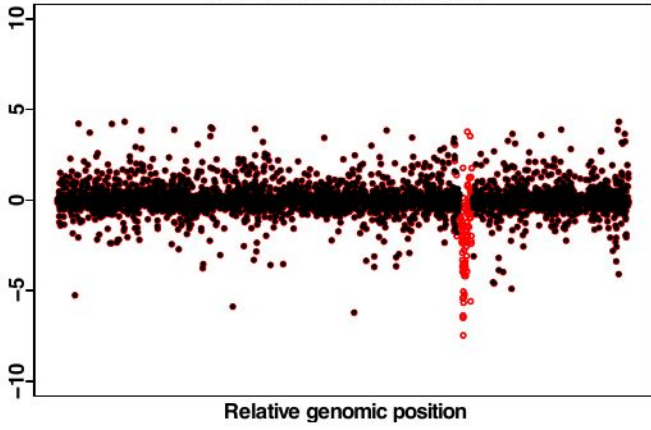

**YML058W.A HUG1 DEL 1**

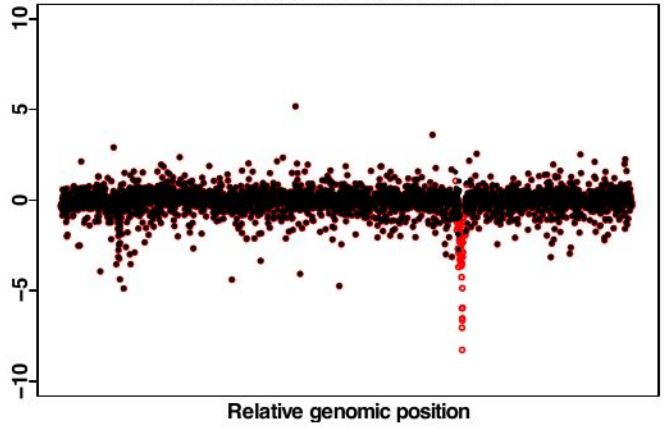

**YML058W.A HUG1 DEL 2**

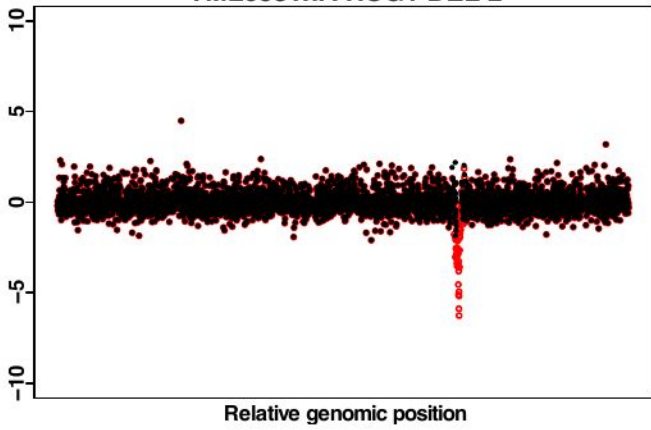

**YML074C FPR3 DEL 1**

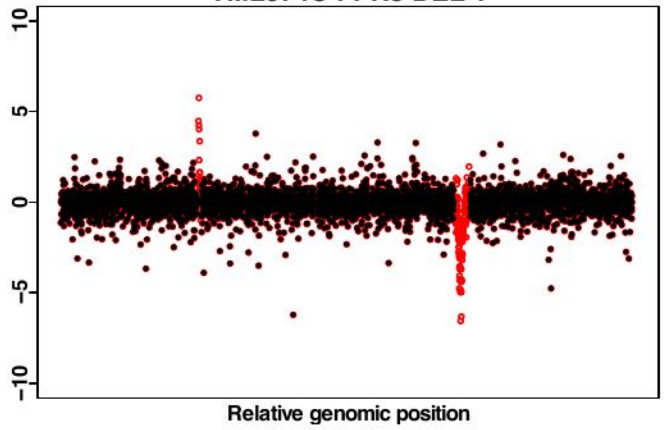

**YML074C FPR3 DEL 2**

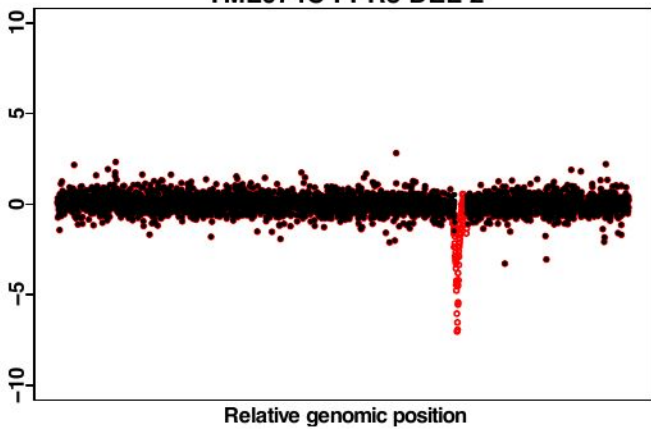

**YML074C FPR3 DEL 3**

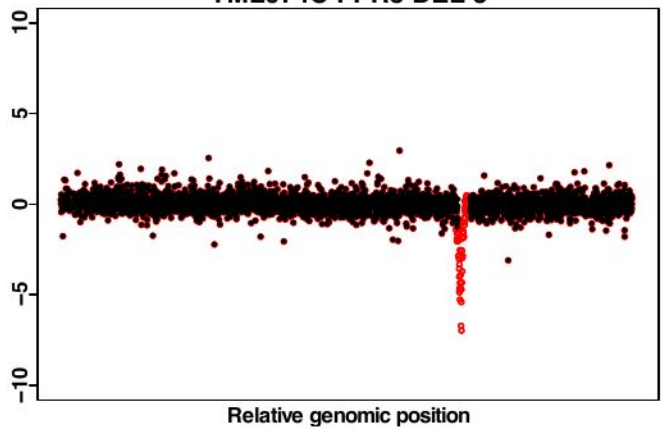

**YMR037C MSN2 DEL 1**

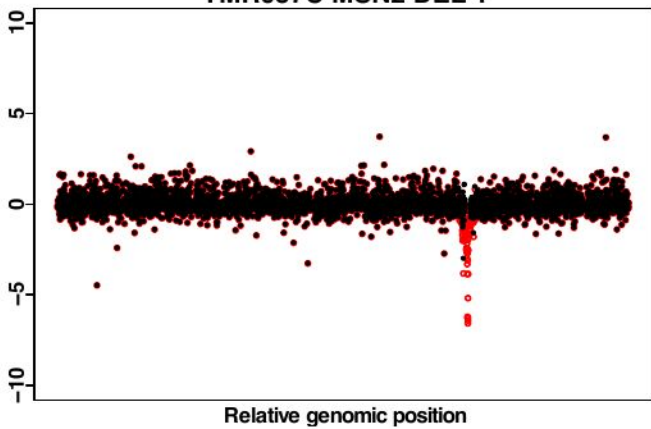

**YMR037C MSN2 DEL 2**

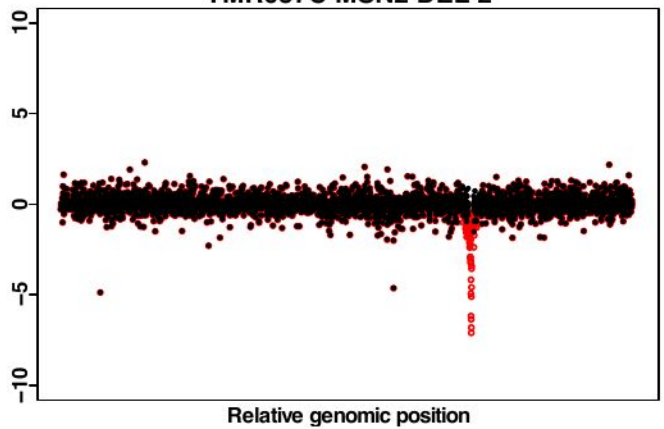

YMR075W RCO1 DEL 1

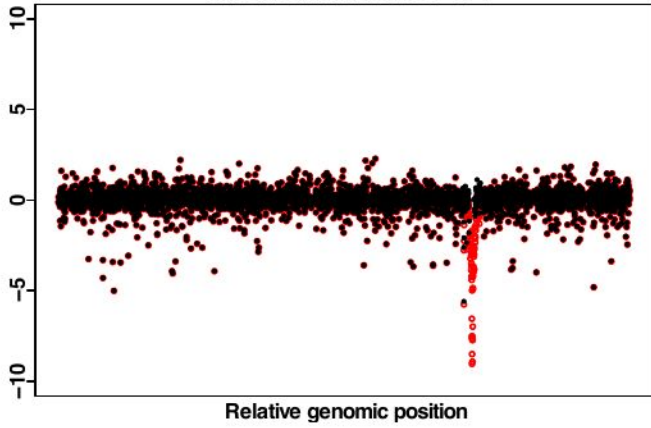

YMR075W RCO1 DEL 2

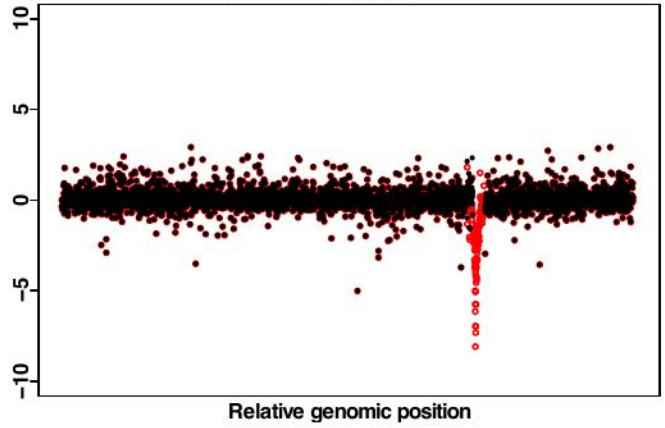

YMR080C NAM7 DEL 1

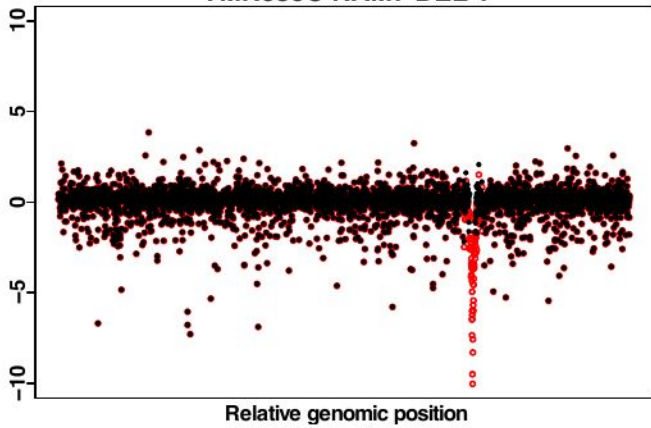

YMR080C NAM7 DEL 2

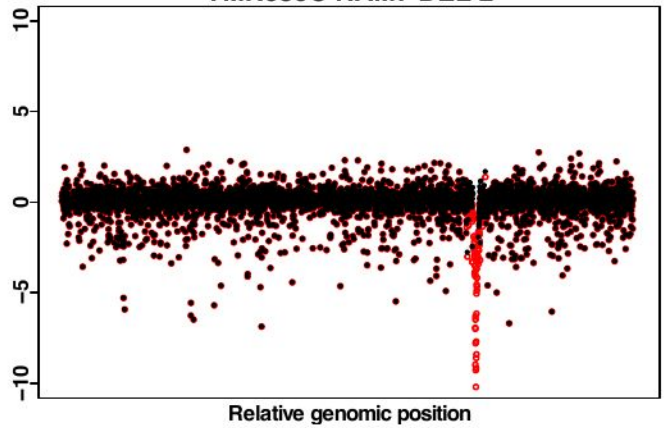

YMR080C NAM7 DEL 3

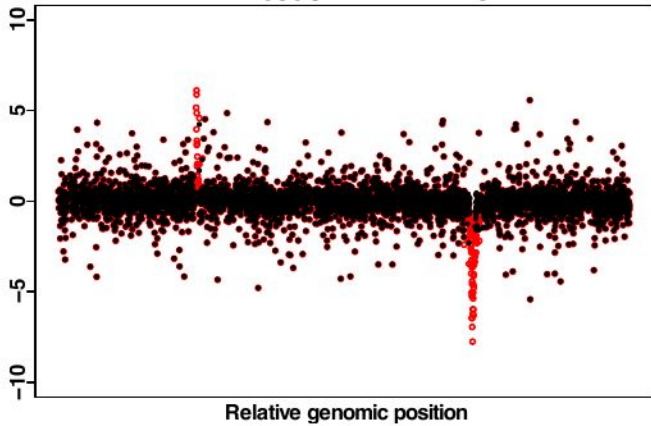

YMR153W NUP53 DEL 1

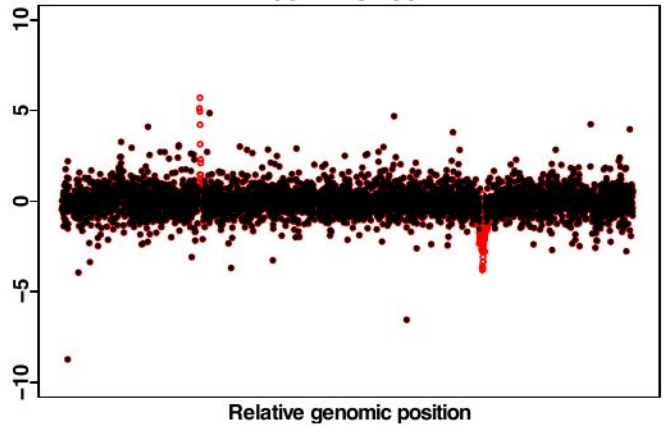

YMR153W NUP53 DEL 2

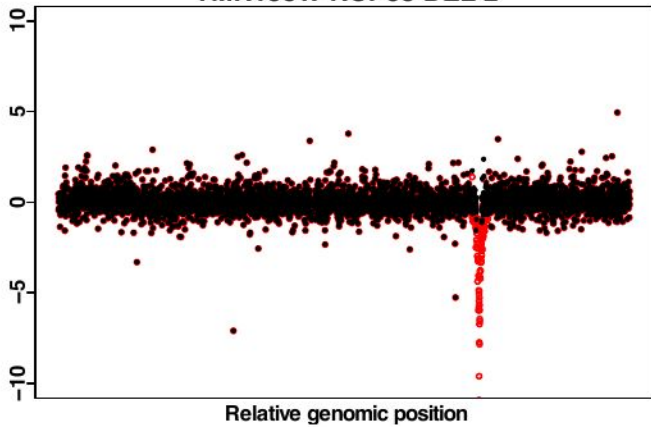

YMR162C DNF3 DEL 1

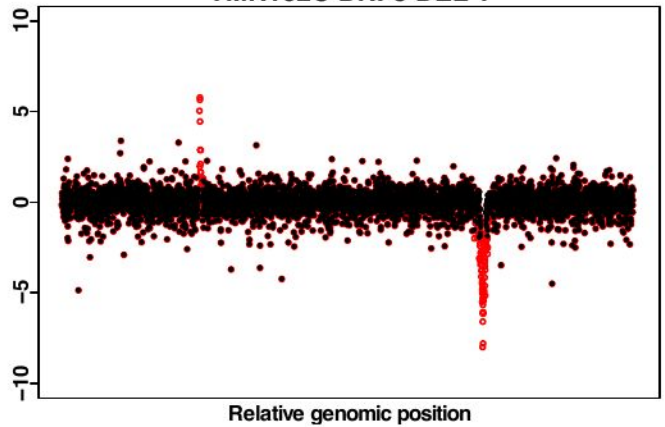



YMR162C DNF3 DEL 2

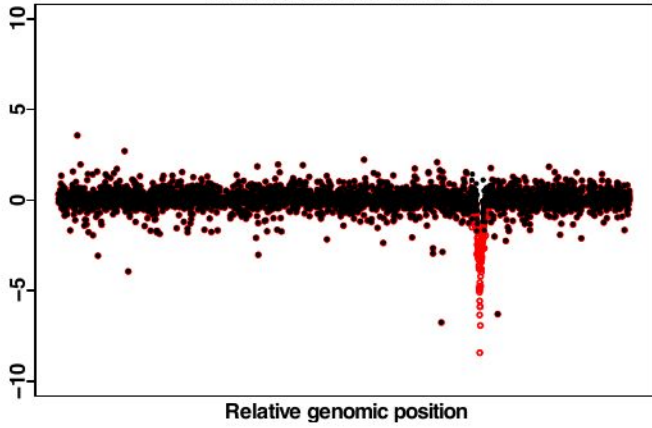

YMR184W ADD37 DEL 1

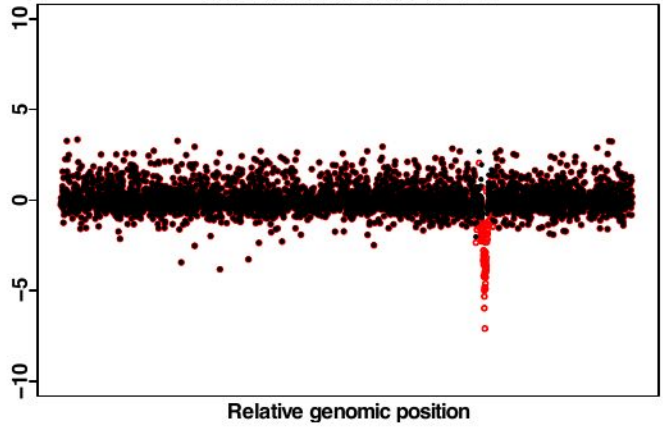

YMR184W ADD37 DEL 2

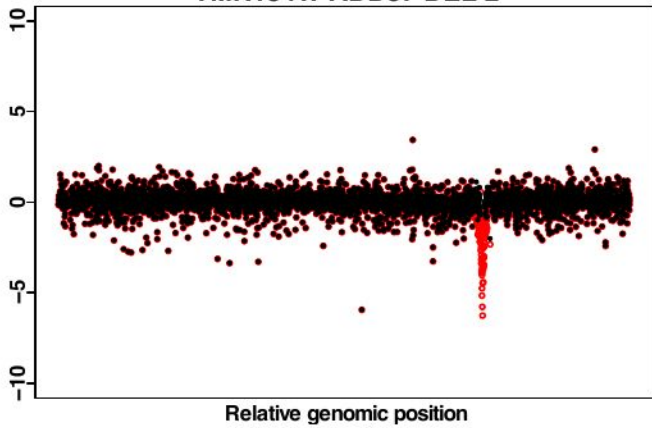

YMR184W ADD37 DEL 3

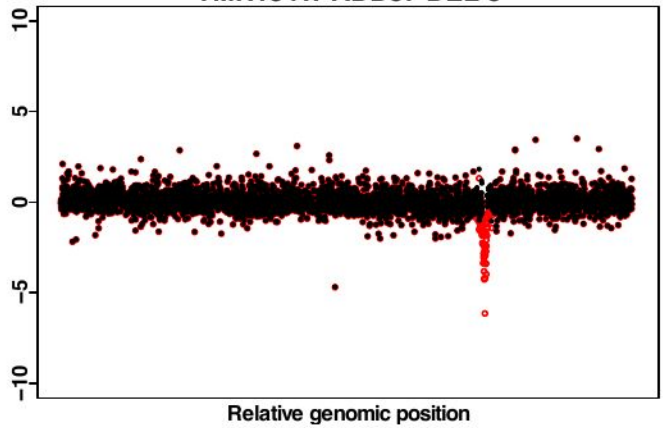

YMR191W SPG5 DEL 1

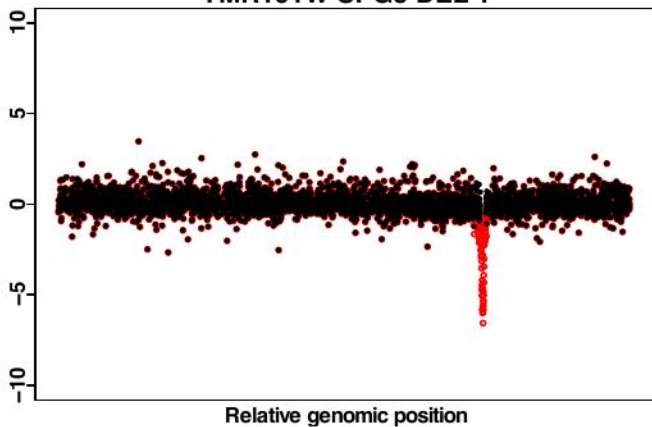

YMR191W SPG5 DEL 2

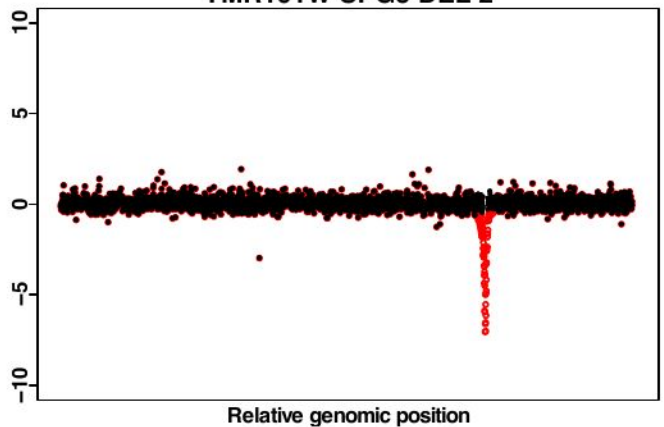

YMR219W ESC1 DEL 1

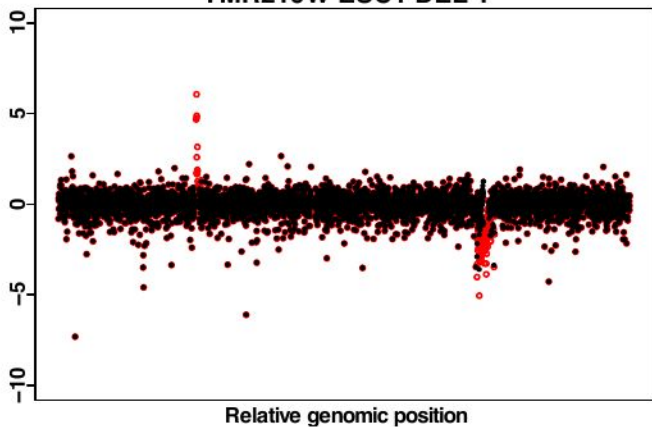

YMR219W ESC1 DEL 2

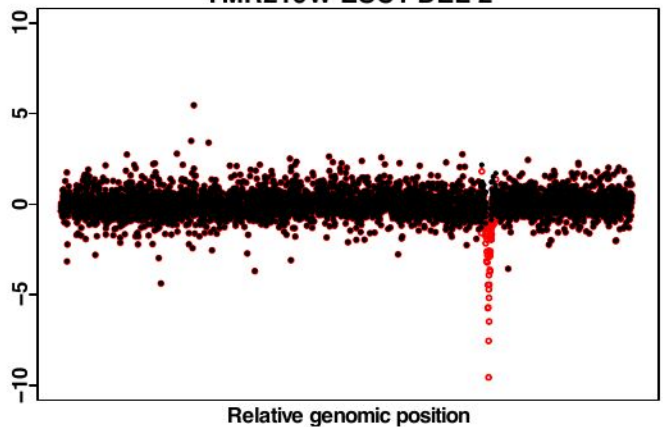

YMR223W UBP8 DEL 1

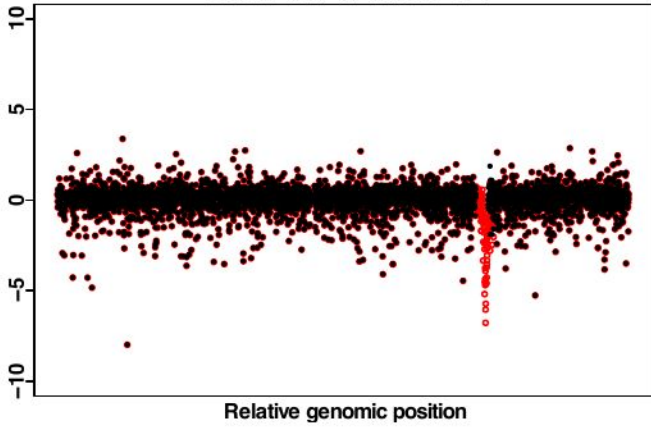

YMR223W UBP8 DEL 2

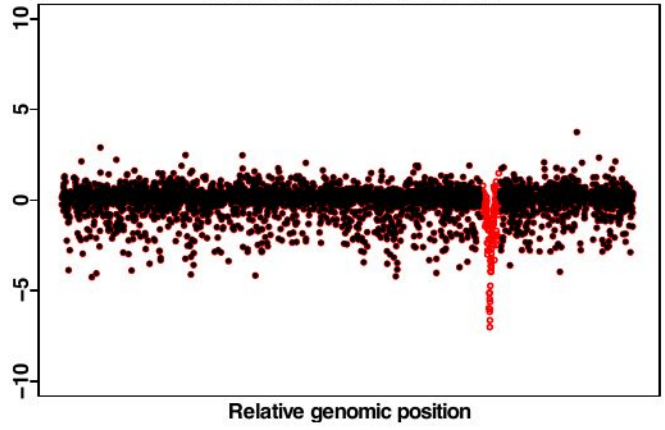

YMR239C RNT1 TETO2 1

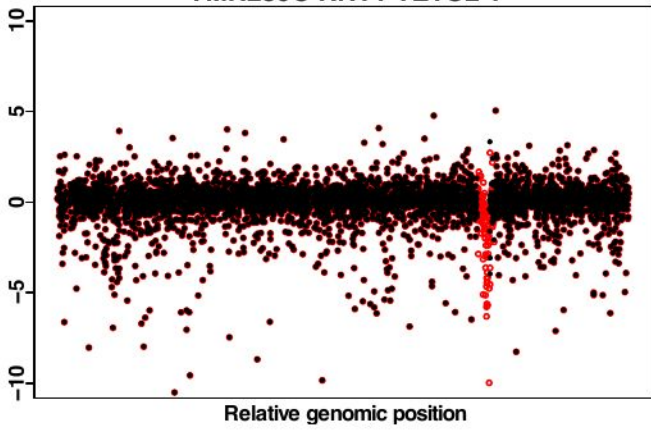

YMR239C RNT1 TETO2 2

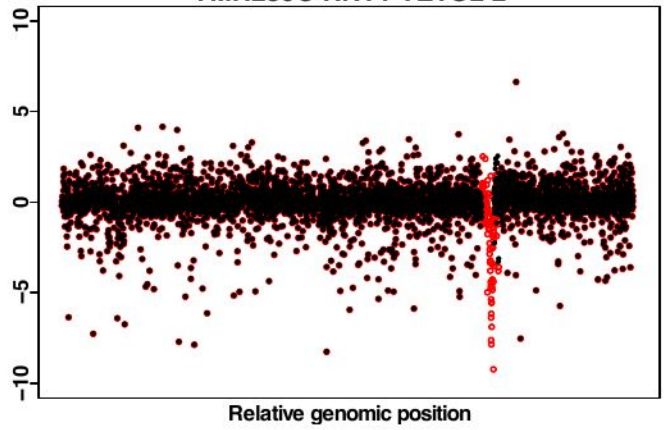

YMR283C RIT1 DEL 1

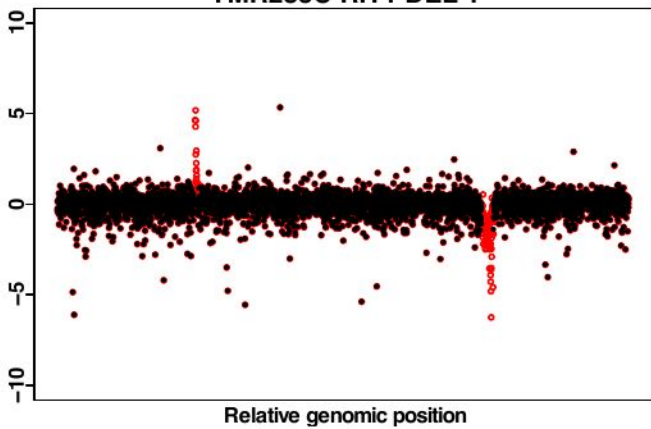

YMR283C RIT1 DEL 2

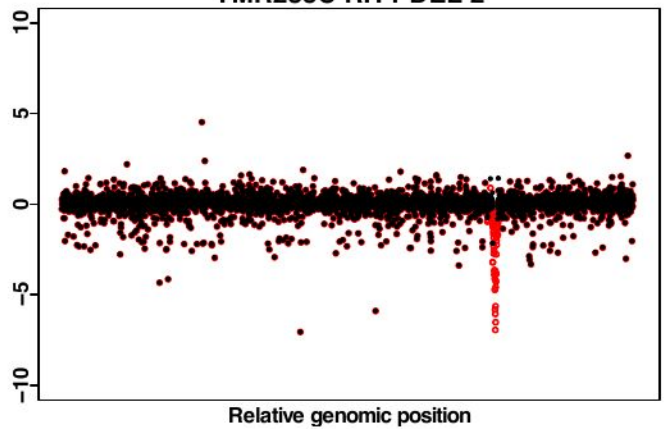

YMR300C ADE4 DEL 1

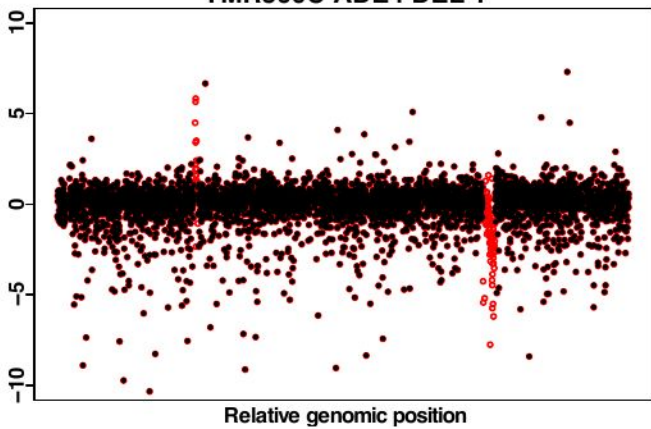

YMR300C ADE4 DEL 2

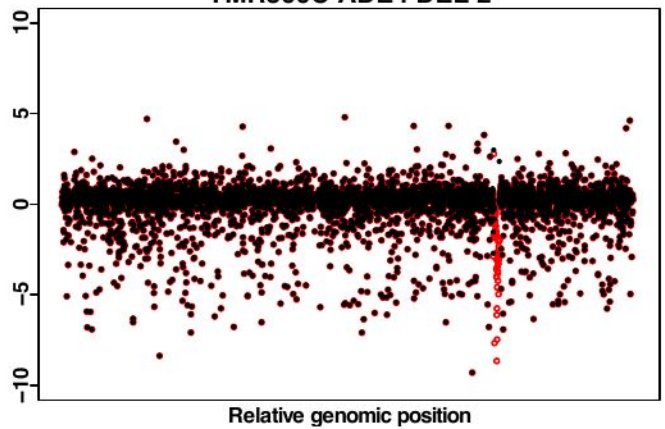

YNL021W HDA1 DEL 1

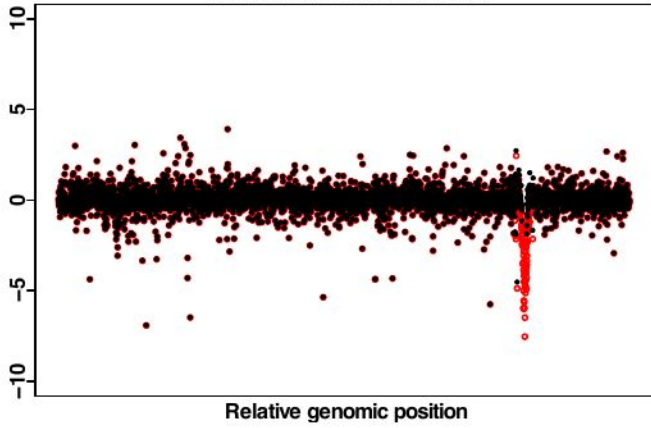

YNL021W HDA1 DEL 2

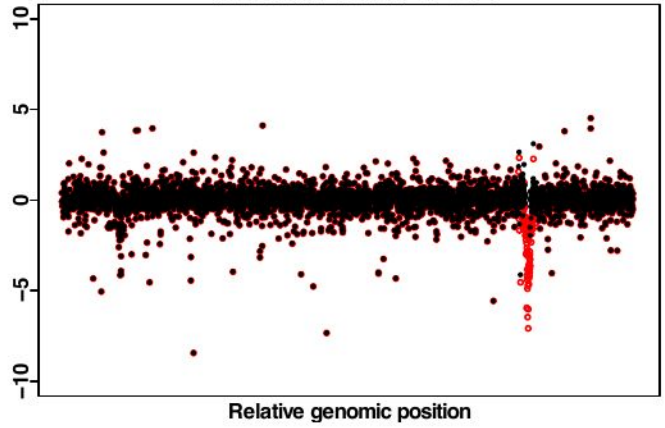

YNL056W OCA2 DEL 1

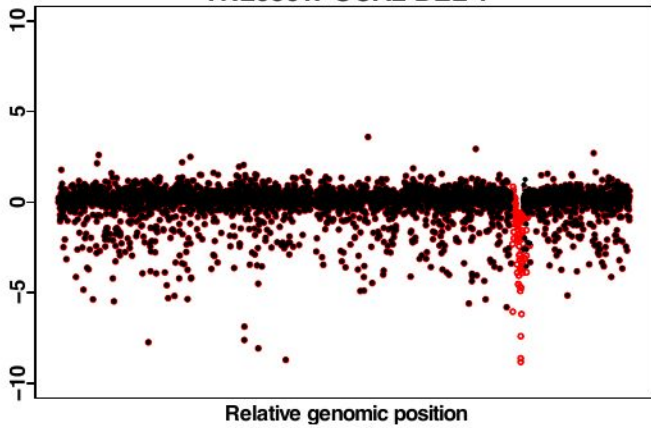

YNL056W OCA2 DEL 2

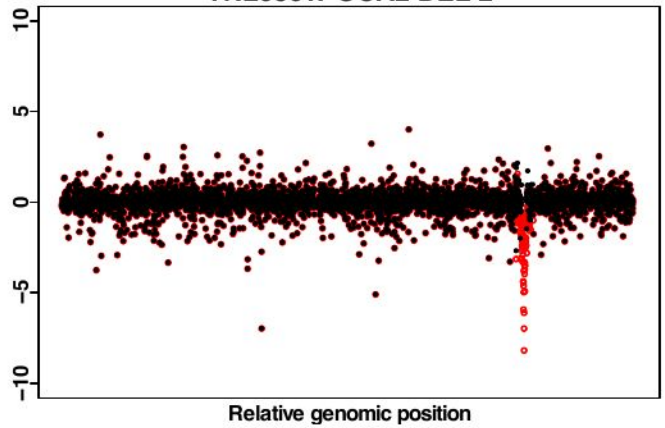

YNL072W RNH201 DEL 1

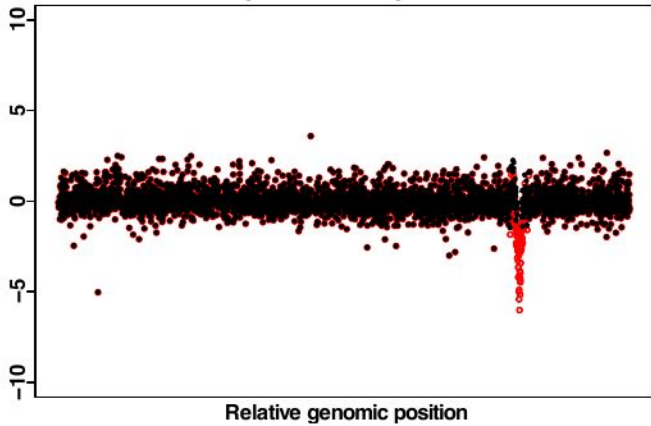

YNL072W RNH201 DEL 2

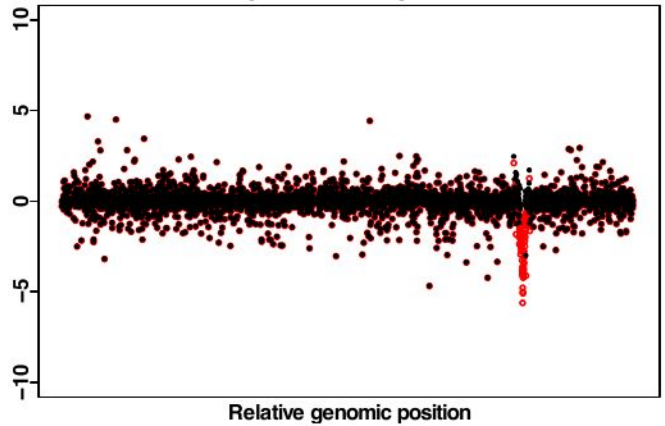

YNL099C OCA1 DEL 1

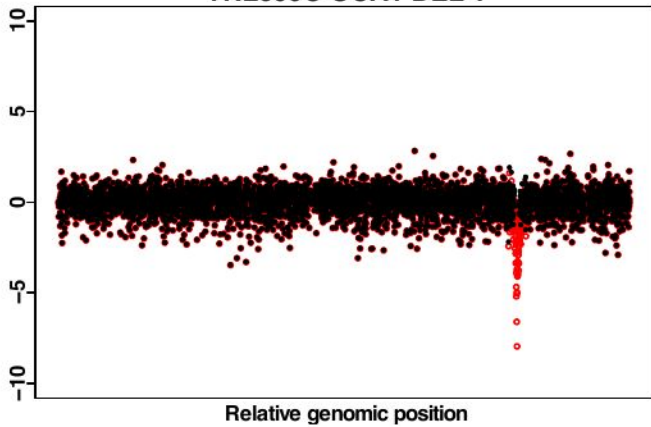

YNL099C OCA1 DEL 2

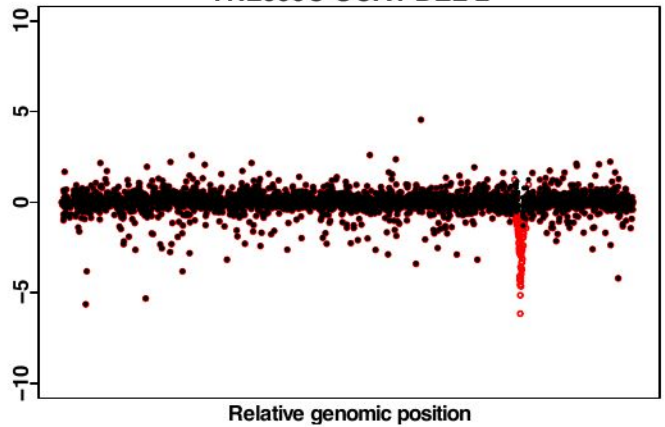



YNL222W SSU72 TETO2 1

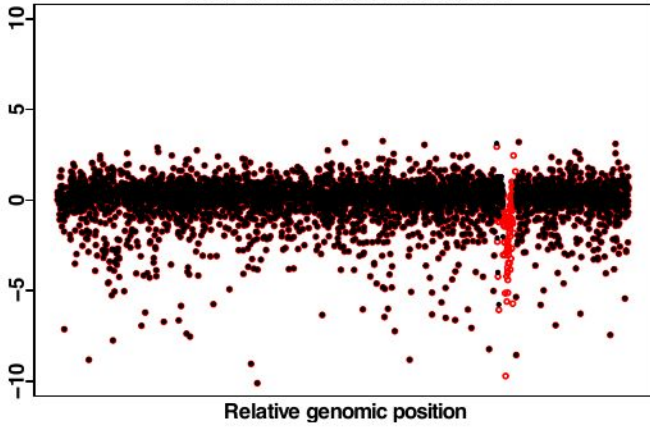

YNL222W SSU72 TETO2 2

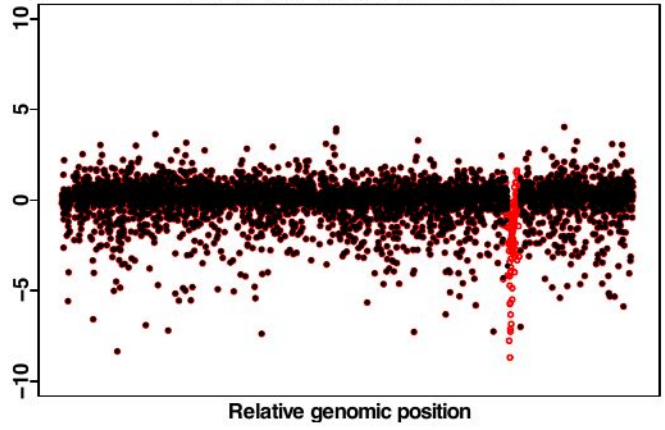

YNL250W RAD50 DEL 1

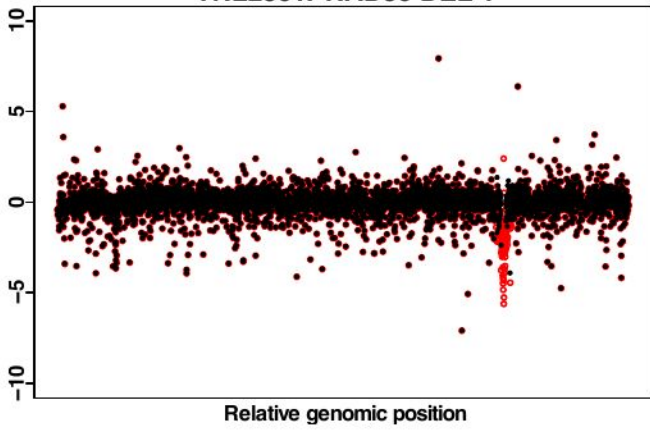

YNL250W RAD50 DEL 2

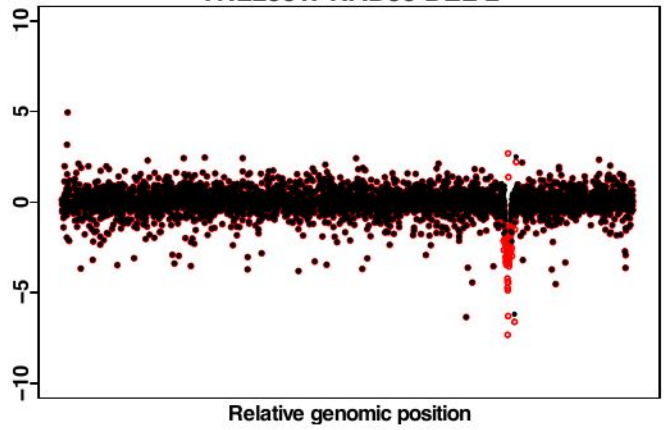

YNL299W TRF5 DEL 1

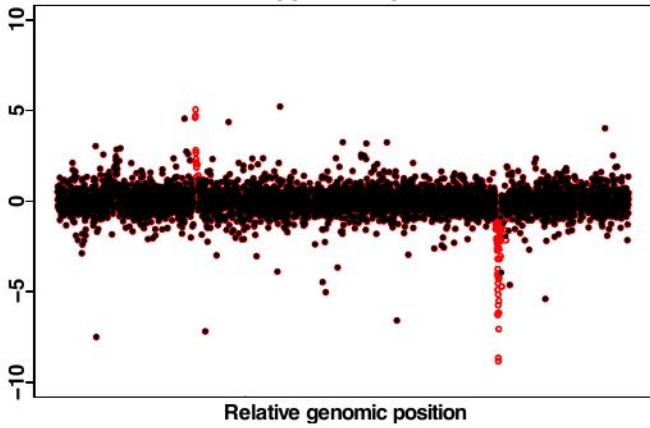

YNL299W TRF5 DEL 2

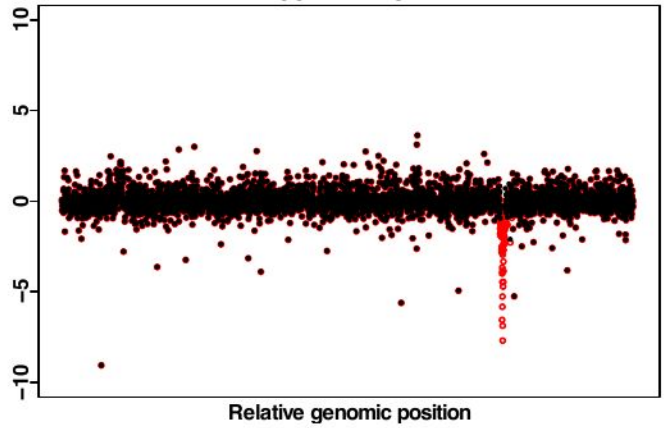

YNR046W TRM112 DAMP 1

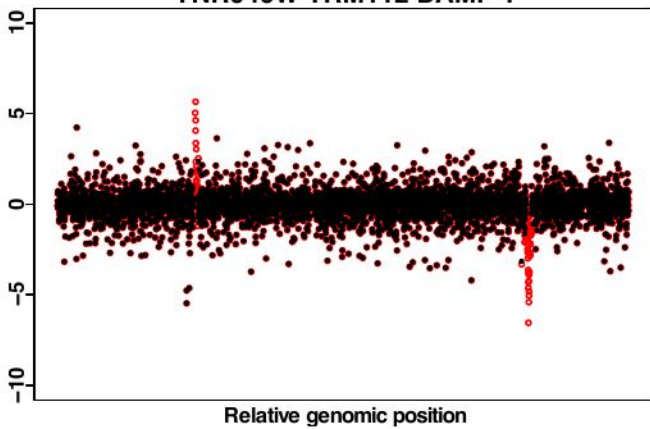

YNR046W TRM112 DAMP 2

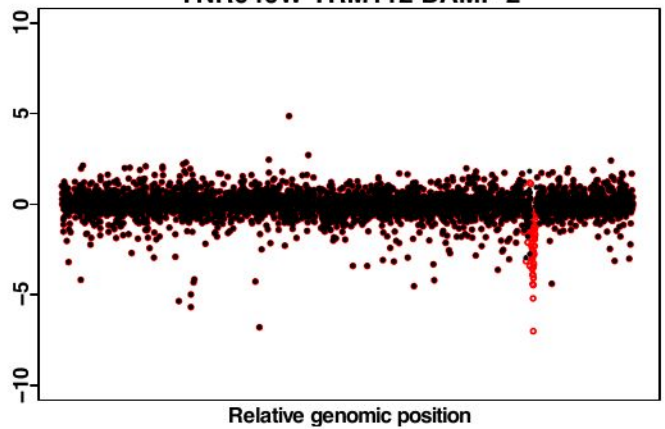

YNR046W TRM112 DAMP 3

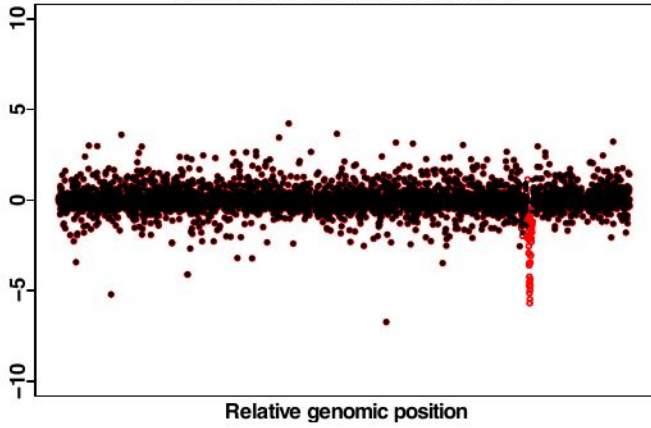

YNR050C LYS9 DEL 1

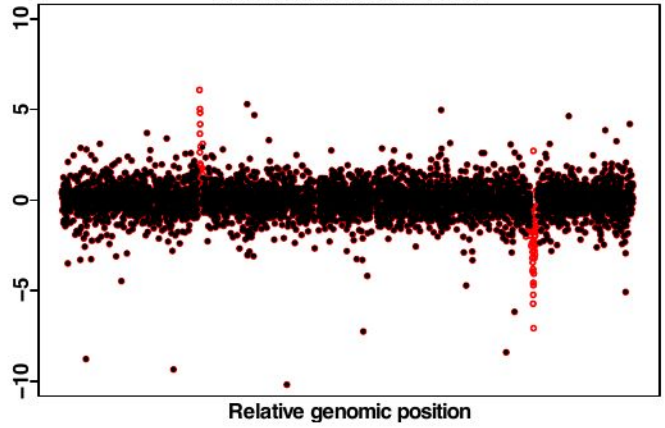

YNR050C LYS9 DEL 2

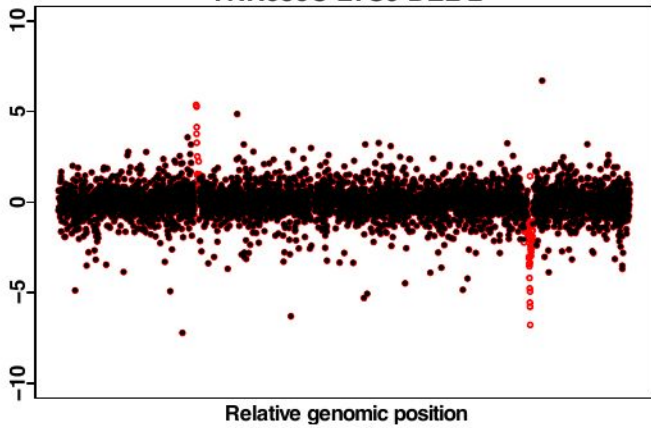

YOL012C HTZ1 DEL 1

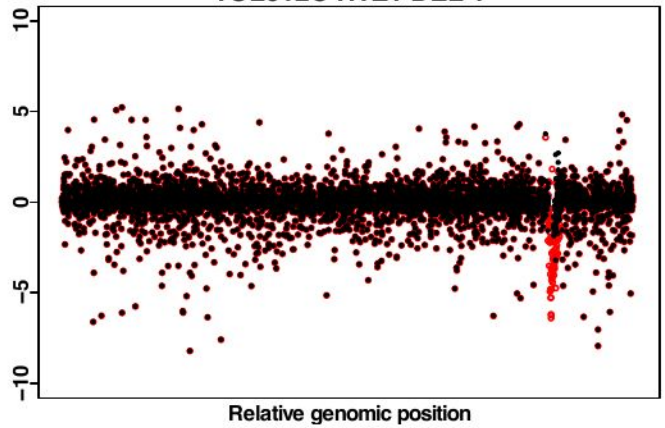

YOL012C HTZ1 DEL 2

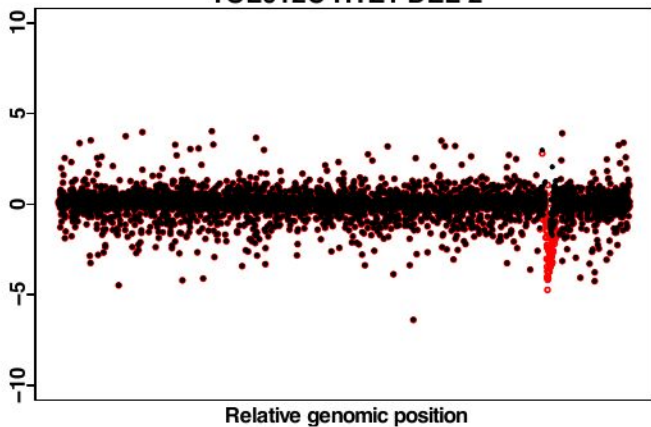

YOL013C HRD1 DEL 1

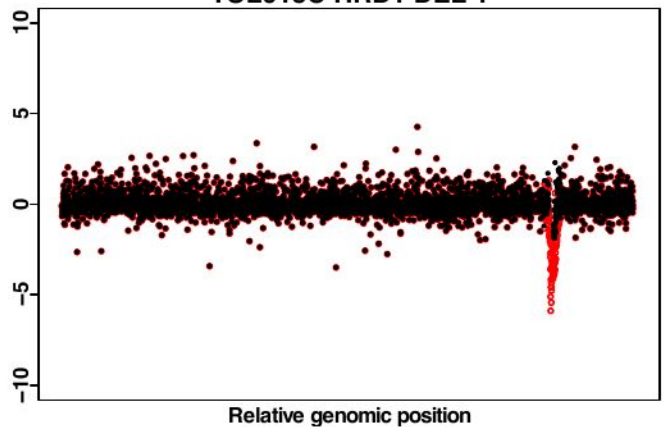

YOL013C HRD1 DEL 2

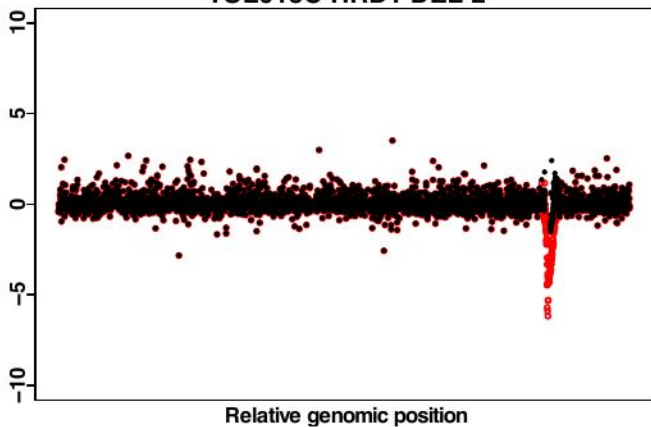

YOL020W TAT2 DEL 1

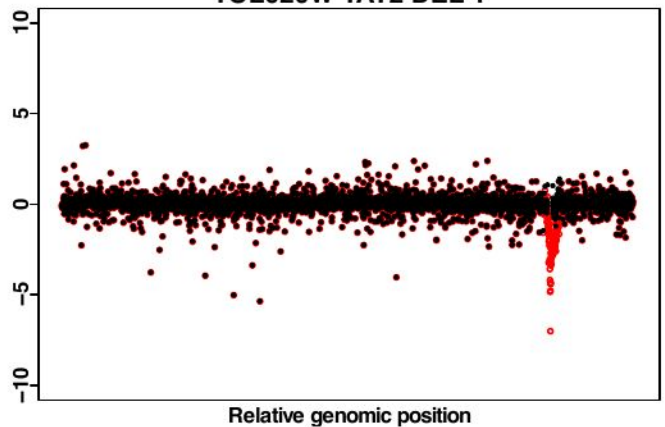



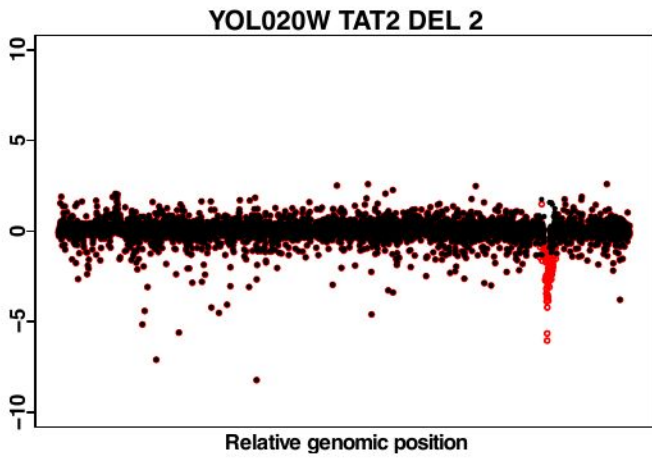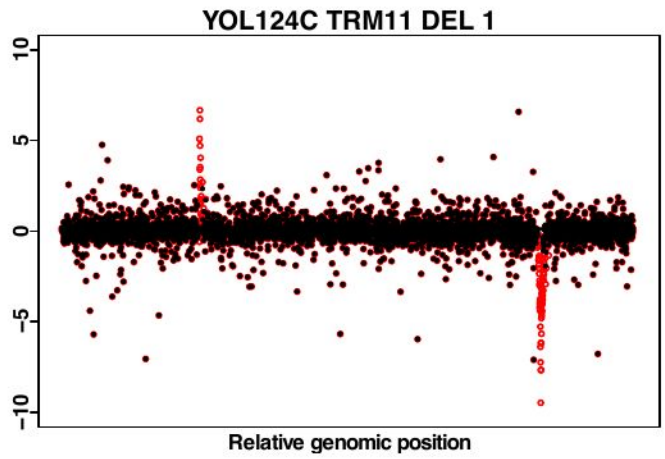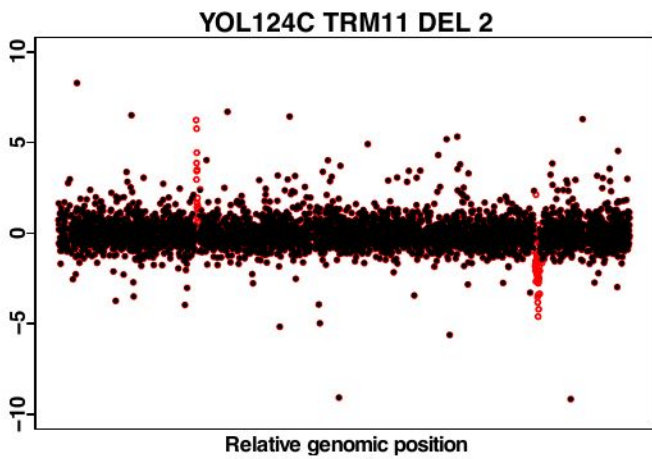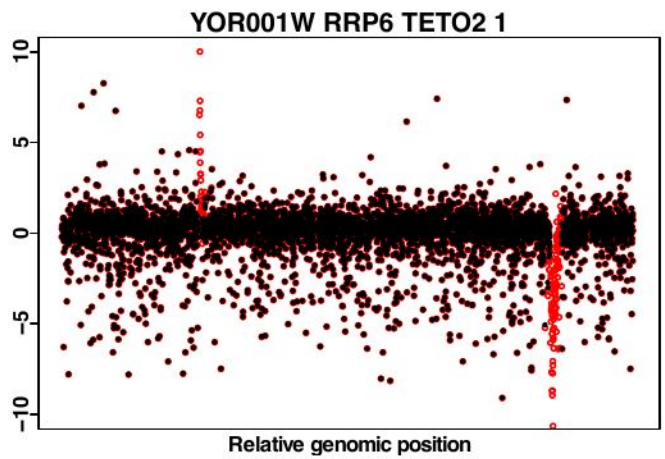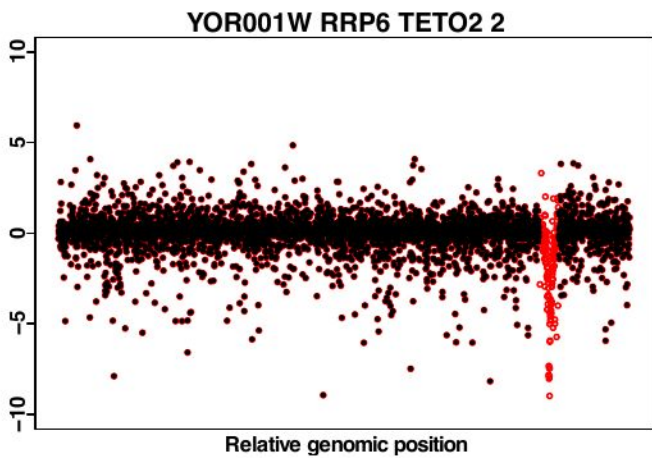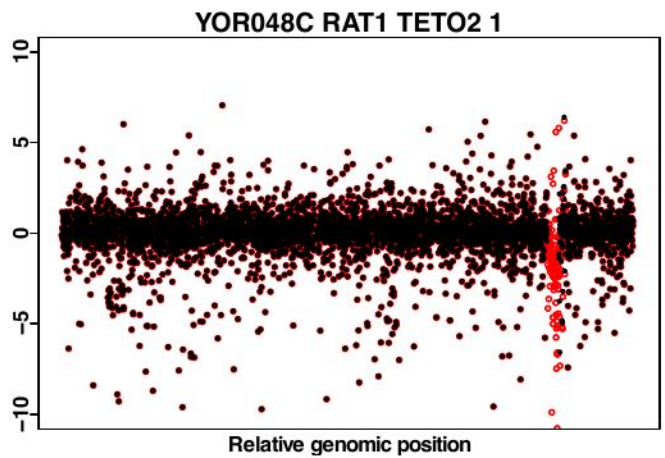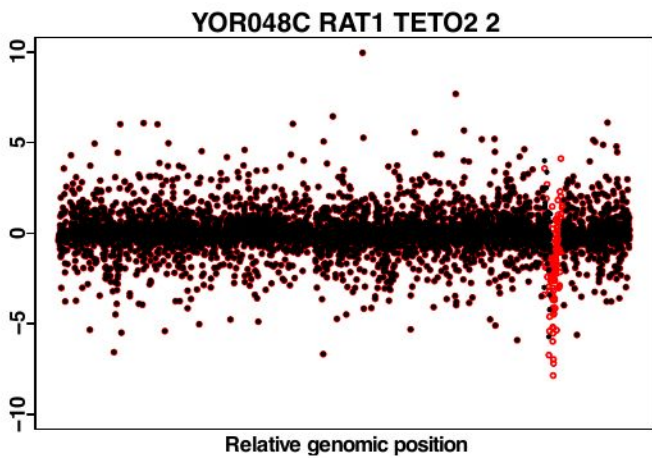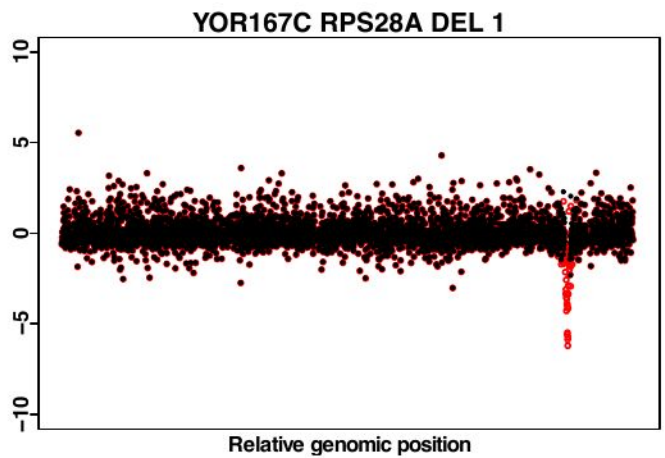



**YOR167C RPS28A DEL 2**

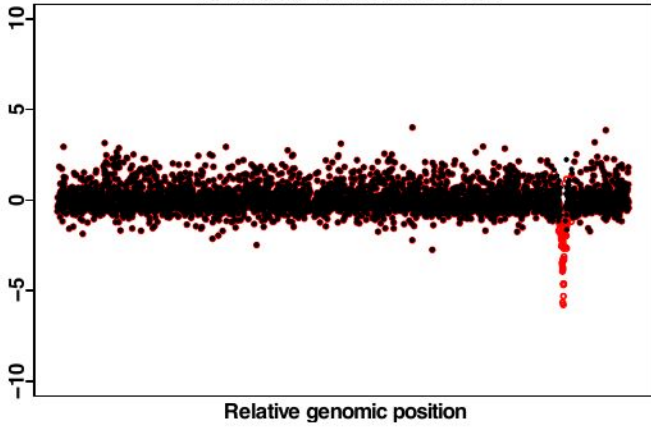

**YOR235W IRC13 DEL 1**

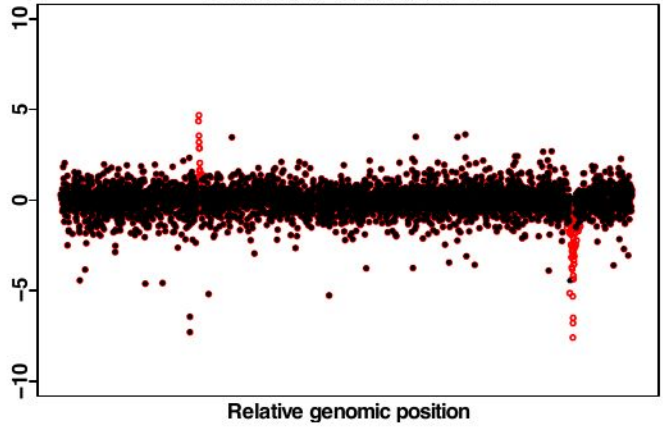

**YOR235W IRC13 DEL 2**

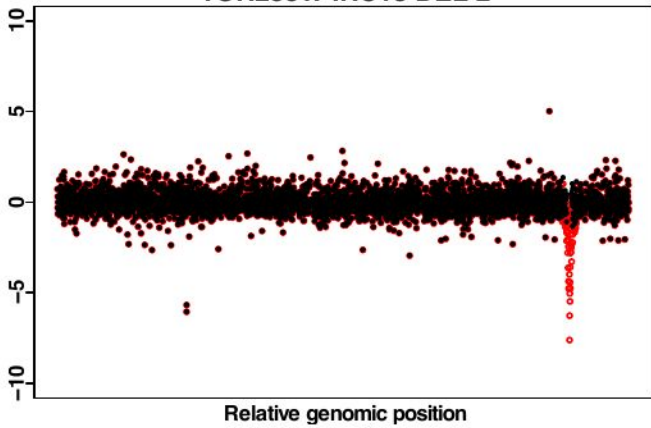

**YOR274W MOD5 DEL 1**

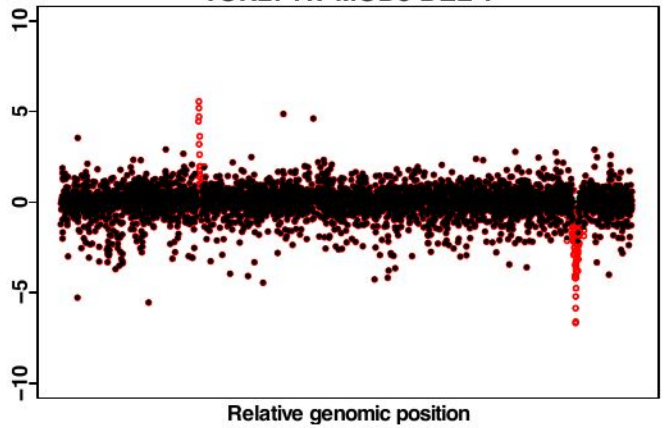

**YOR274W MOD5 DEL 2**

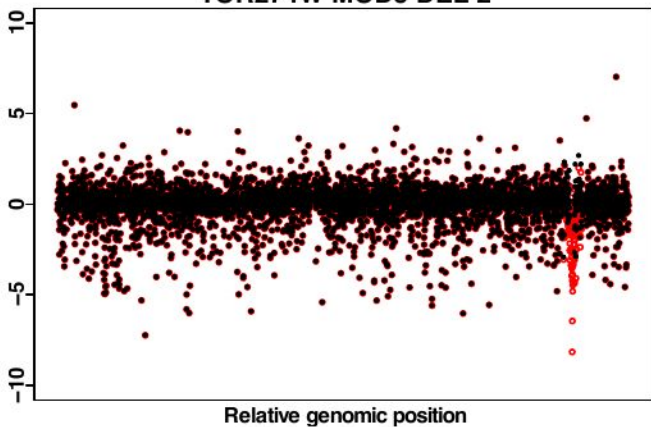

**YOR304W ISW2 DEL 1**

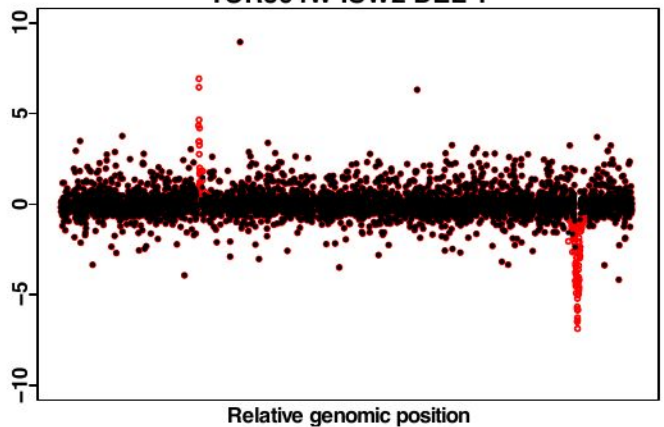

**YOR304W ISW2 DEL 2**

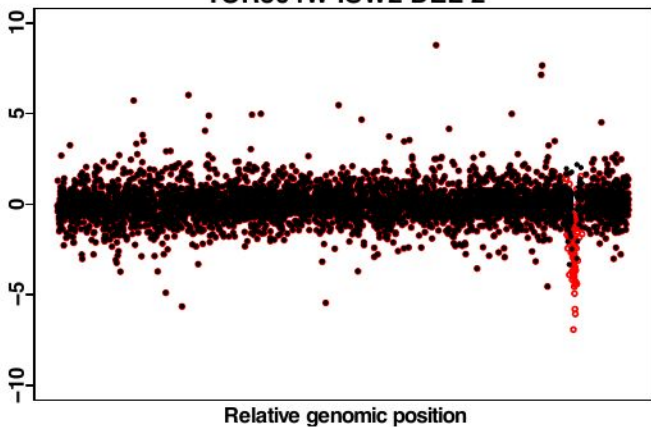

**YOR310C NOP58 DAMP 1**

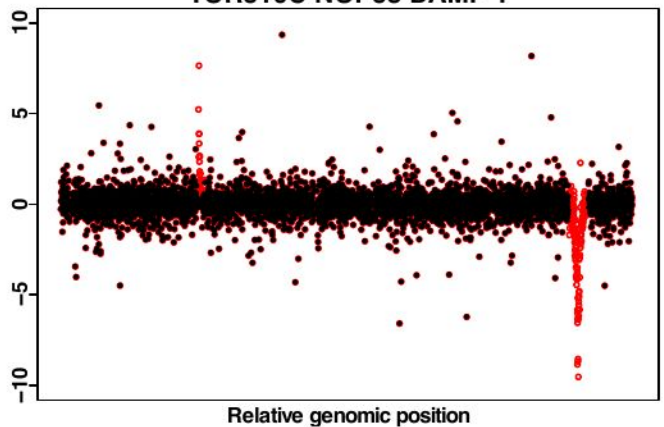

**YOR310C NOP58 DAMP 2**

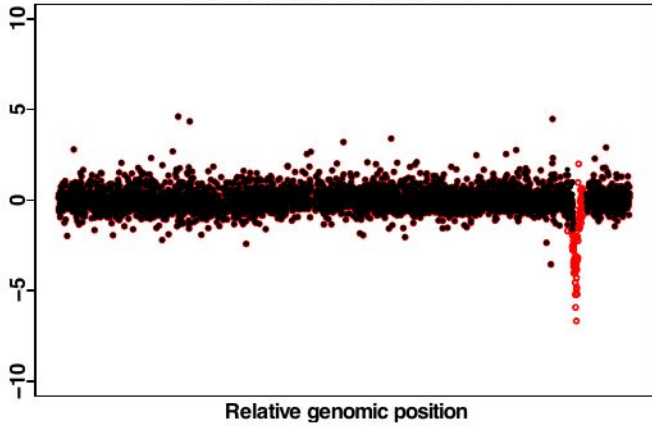

**YOR339C UBC11 DEL 1**

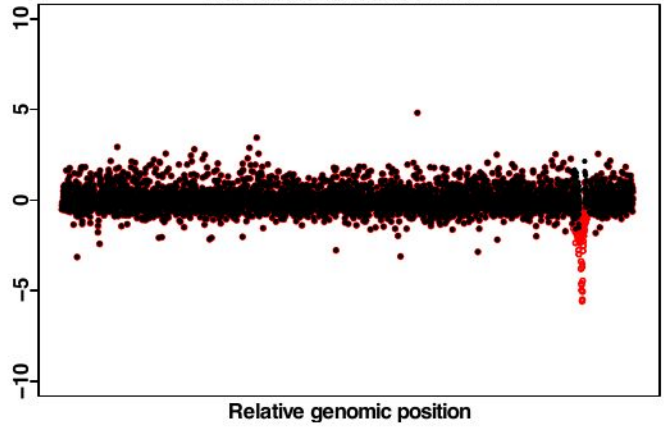

**YOR339C UBC11 DEL 2**

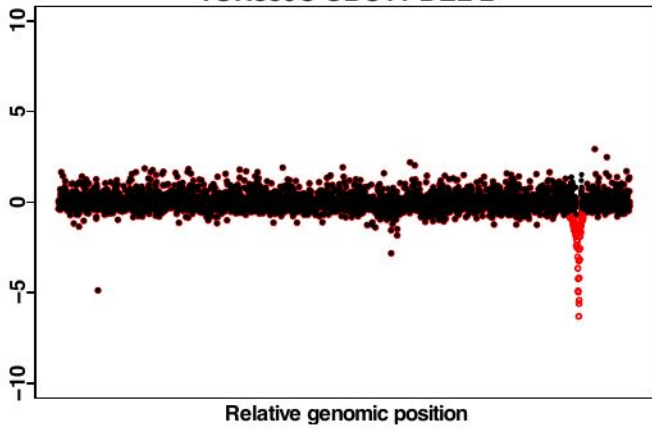

**YPL093W NOG1 DAMP 1**

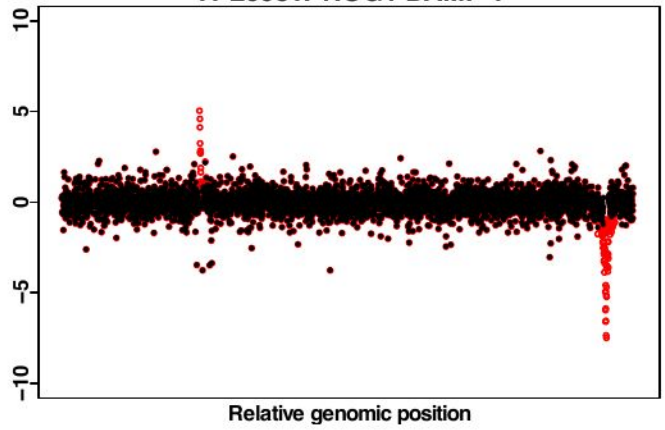

**YPL093W NOG1 DAMP 2**

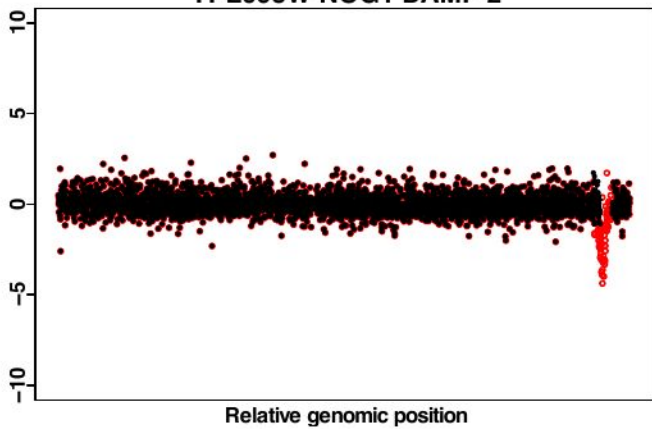

**YPL144W POC4 DEL 1**

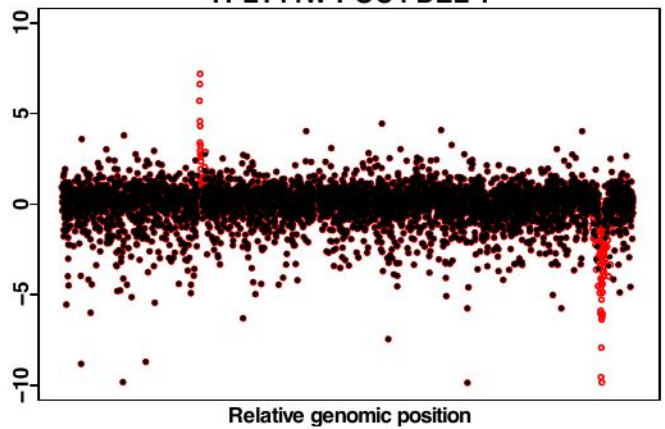

**YPL144W POC4 DEL 2**

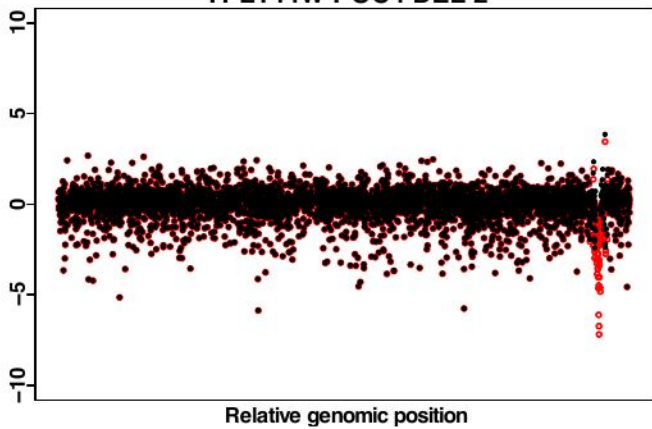

**YPL184C MRN1 DEL 1**

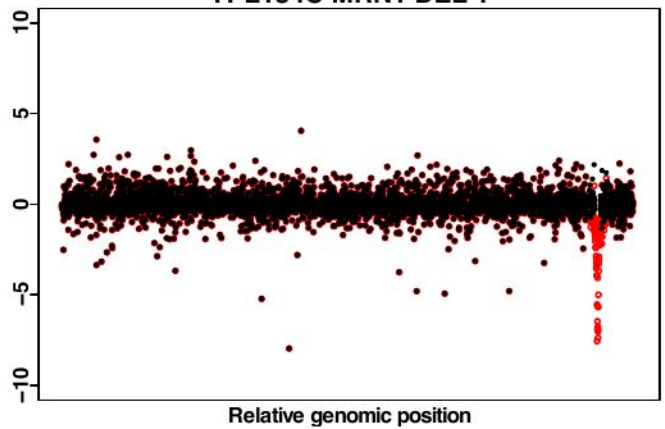

YPL184C MRN1 DEL 2

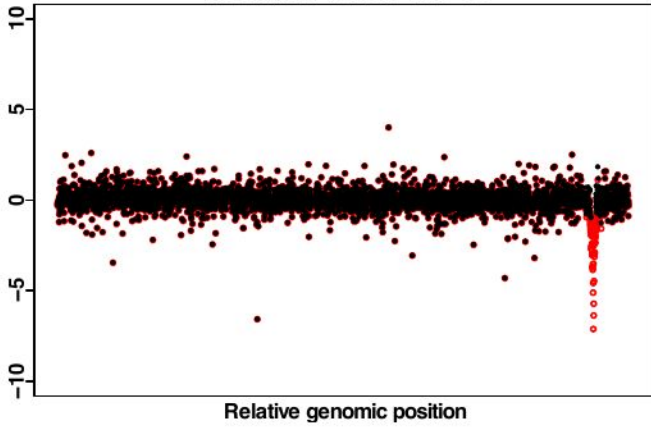

YPL198W RPL7B DEL 1

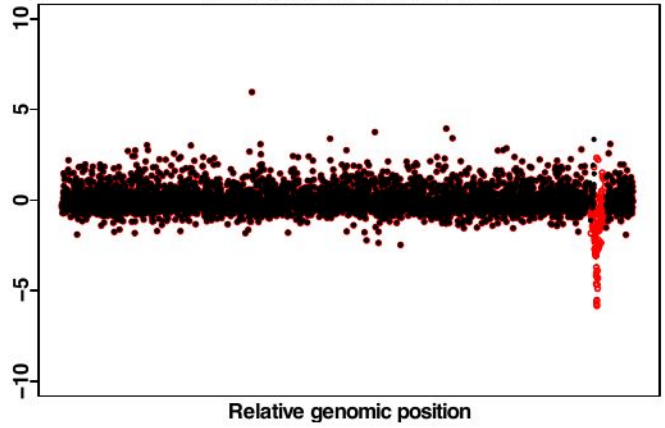

YPL198W RPL7B DEL 2

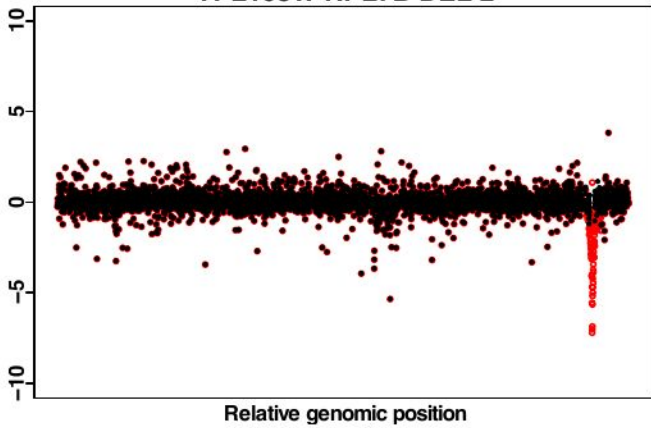

YPL200W CSM4 DEL 1

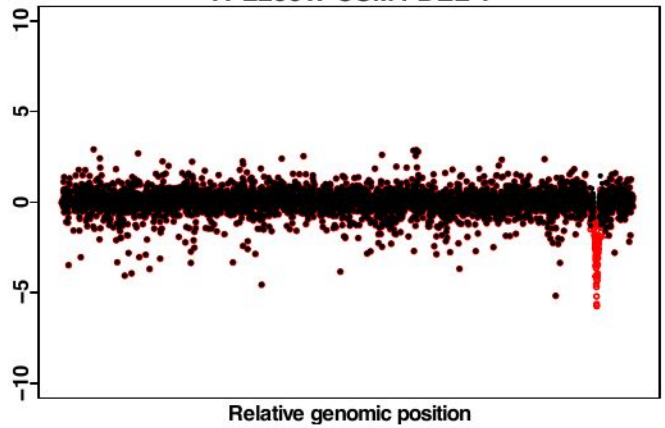

YPL200W CSM4 DEL 2

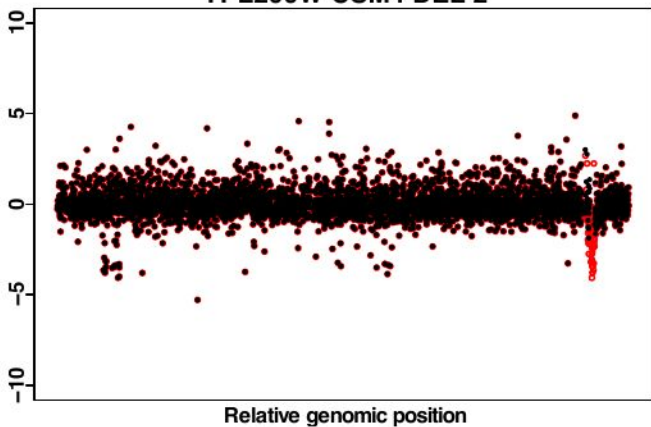

YPL212C PUS1 DEL 1

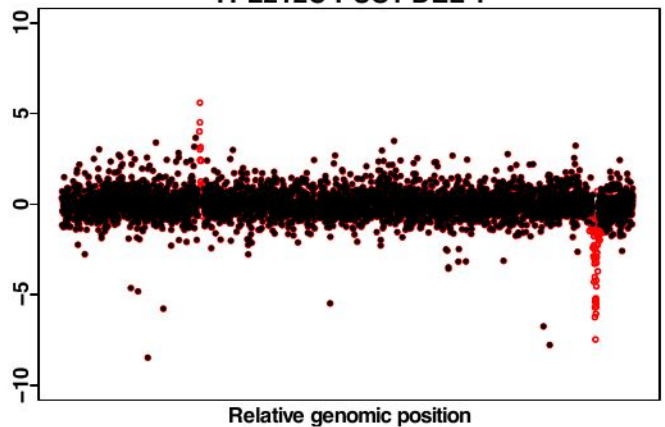

YPL212C PUS1 DEL 2

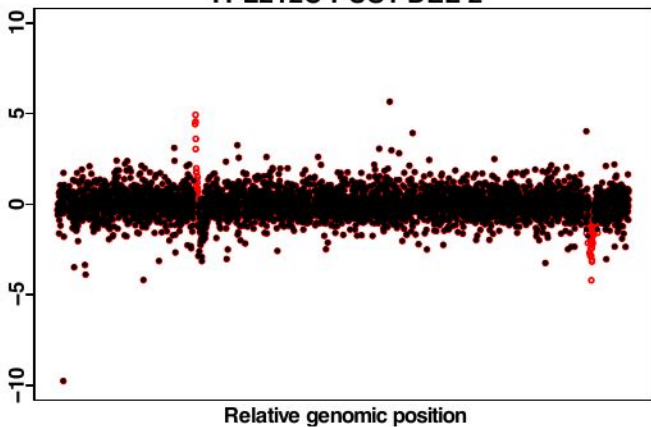

YPL212C PUS1 DEL 3

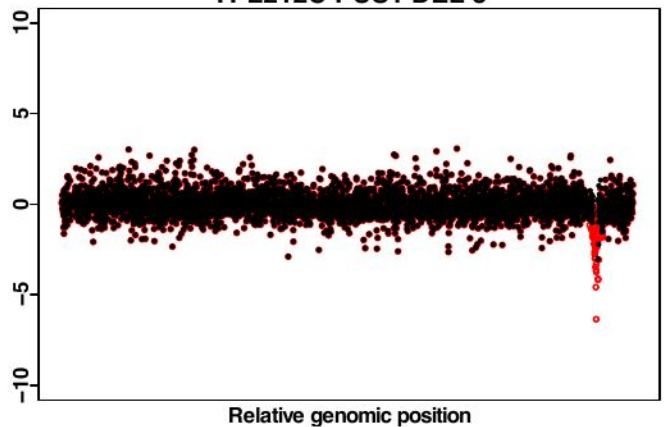



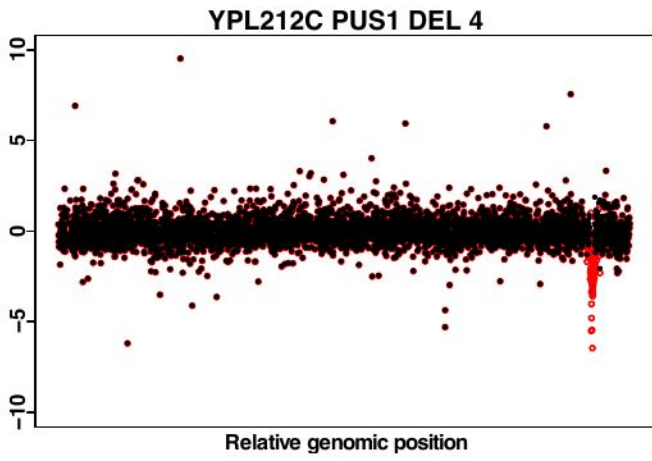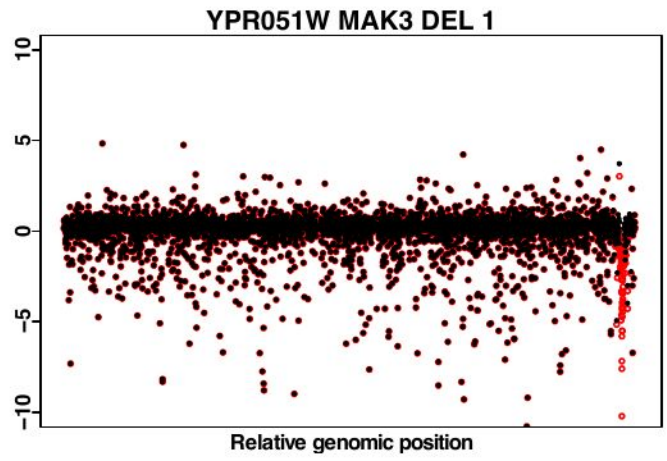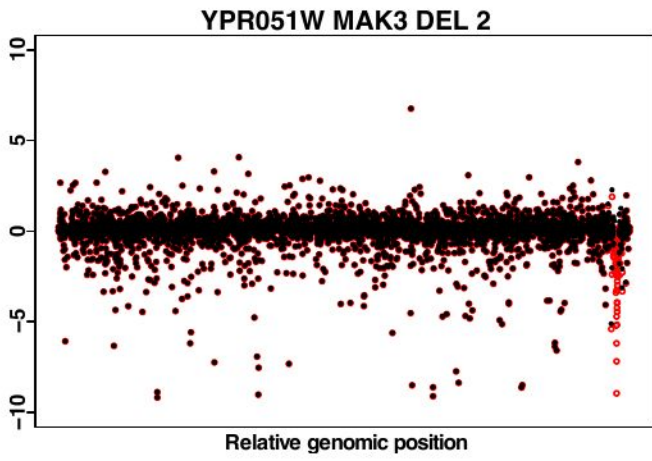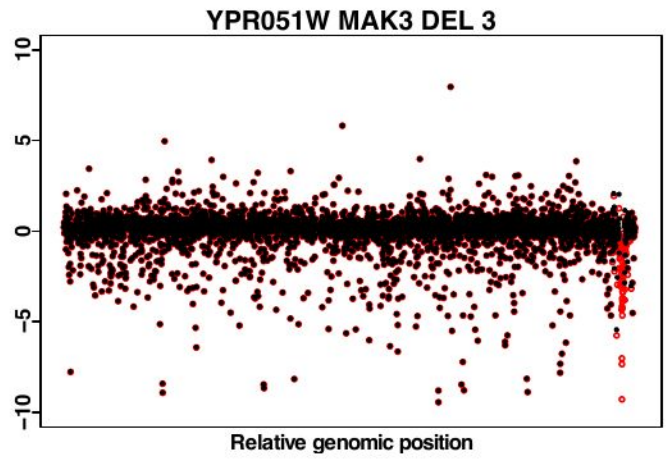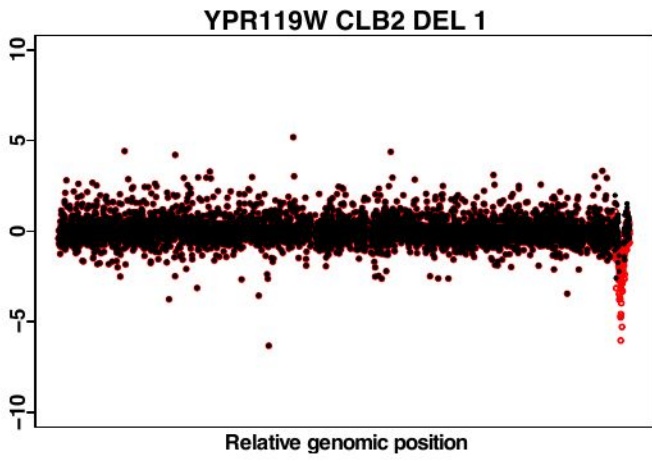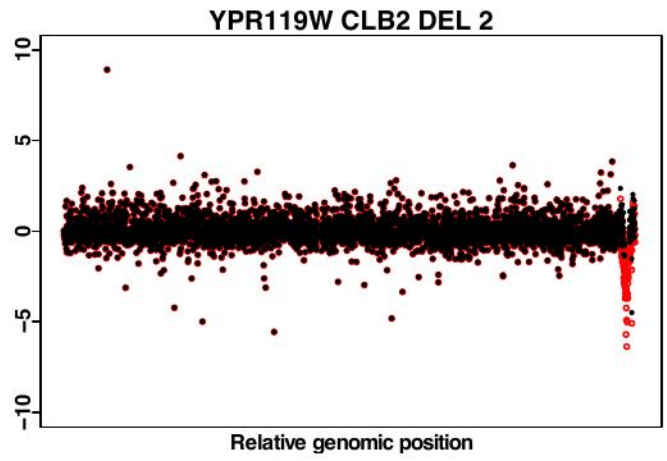

Supplement: Supplementary file [file media-1.pdf]
